# Supplementary material
Source: PubMed Central journal article supplement (PMC5939939)

**Supplemental Figure 1. Response curves for immuno-MRM assays.** Each page consists of a response curve plot for an analyte. The analyte name is listed on the top of the page. There are two plots corresponding to each analyte: linear plot and log(10) plot. Individual transitions and the sum of all transitions are plotted. Error bars are the standard deviation of technical triplicates.

Analyte: sp|Q0VG06|FP100\_HUMAN.APS[+80]PLGPTR

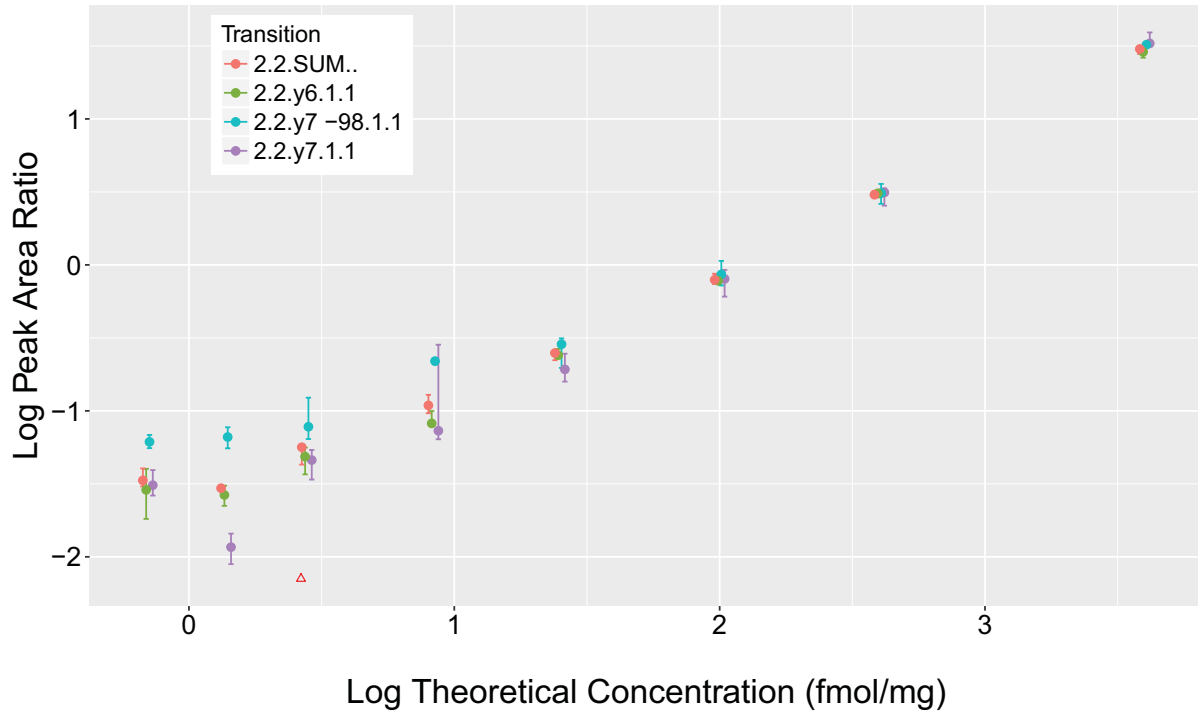

Analyte: sp|Q0VG06|FP100\_HUMAN.APS[+80]PLGPTR

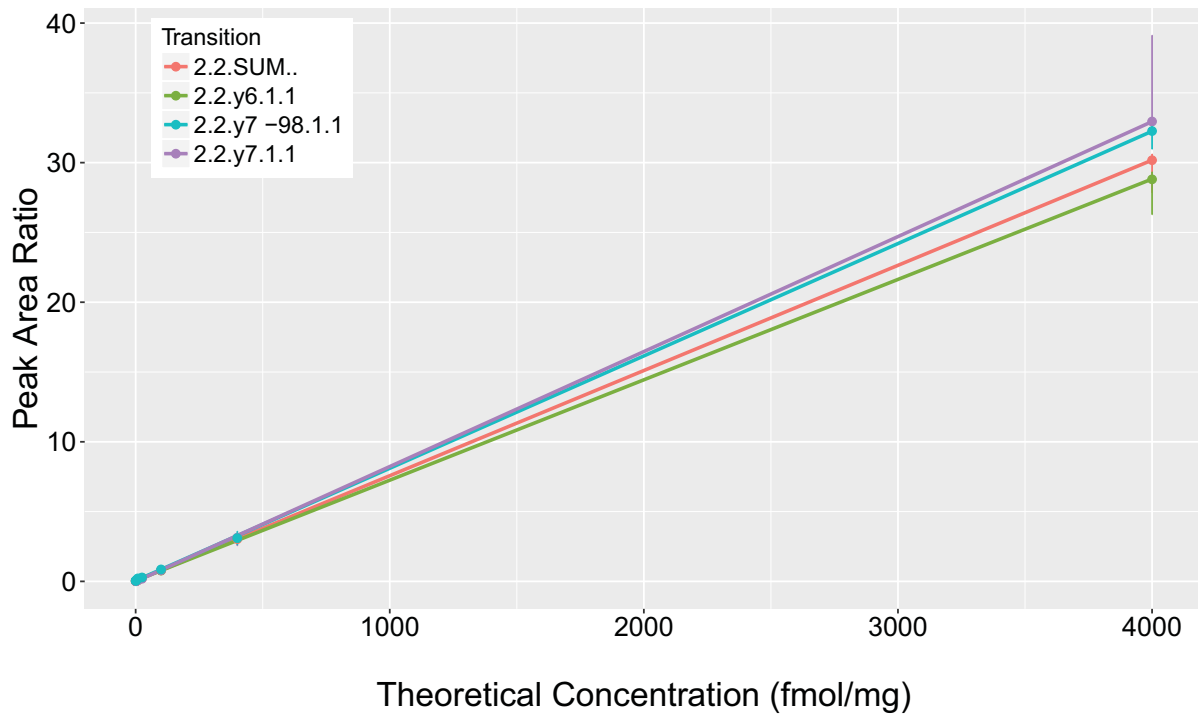

Analyte: sp|Q0VG06|FP100\_HUMAN.APSPLGPTR

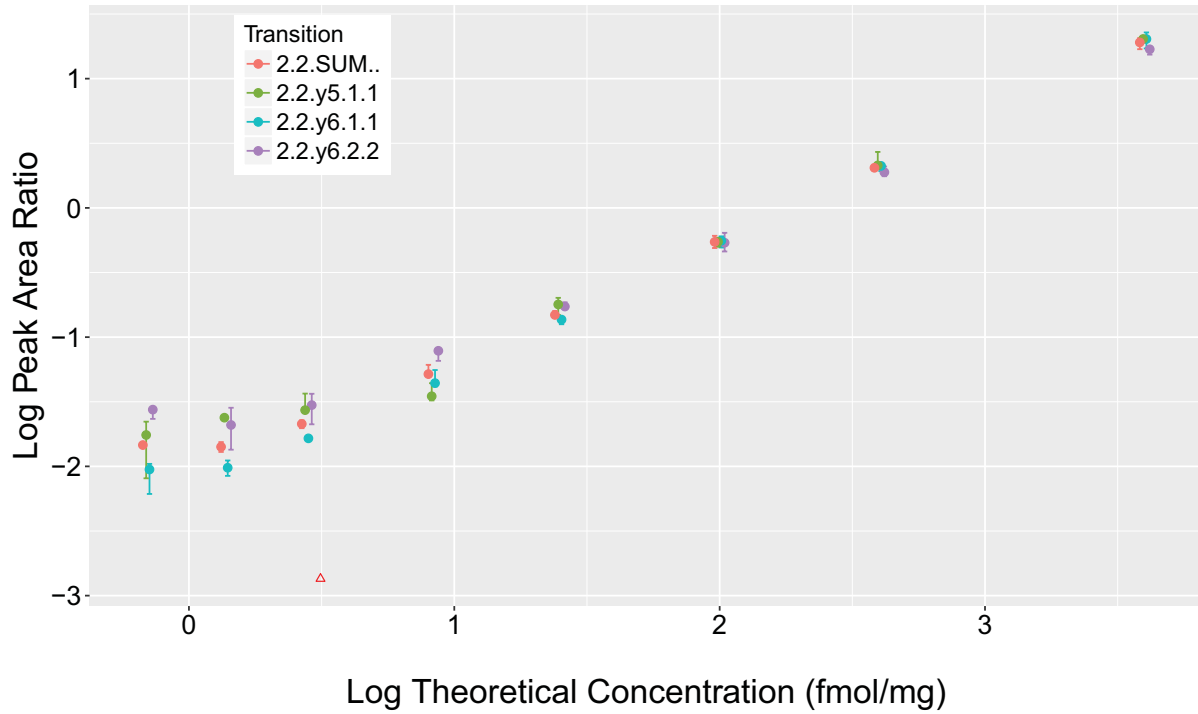

Analyte: sp|Q0VG06|FP100\_HUMAN.APSPLGPTR

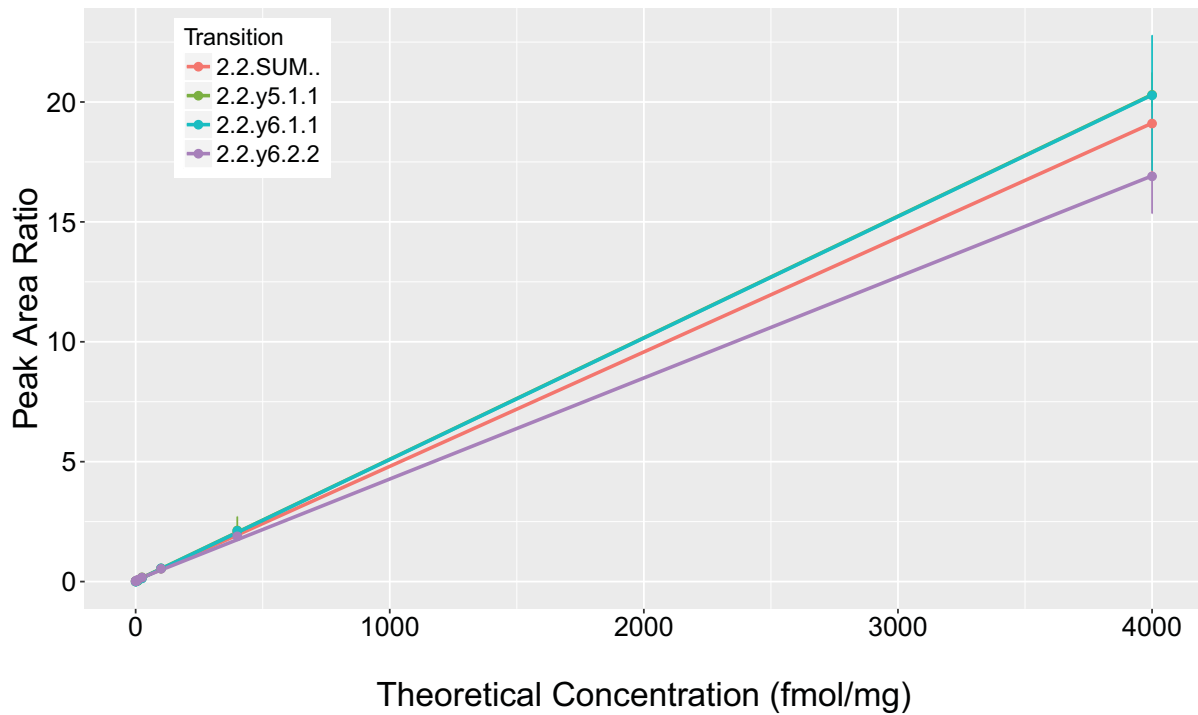

Analyte: sp|Q14676|MDC1\_HUMAN.AQPFGFIDS[+80]DTDAEEER

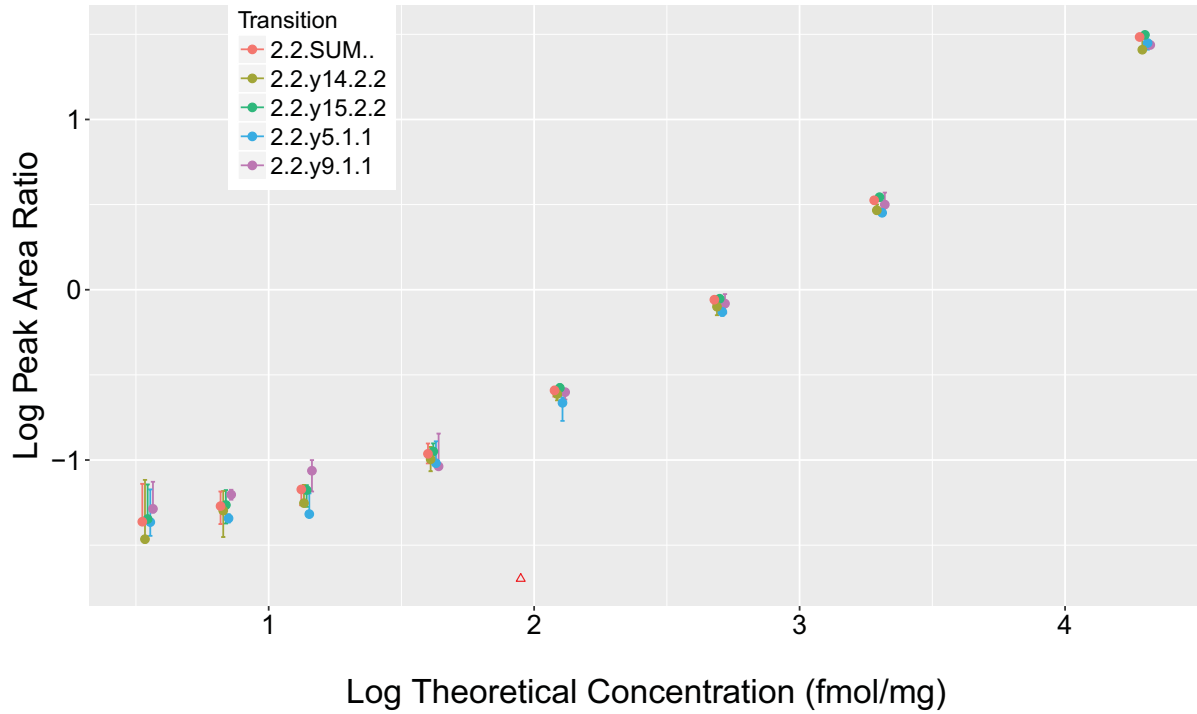

Analyte: sp|Q14676|MDC1\_HUMAN.AQPFGFIDS[+80]DTDAEEER

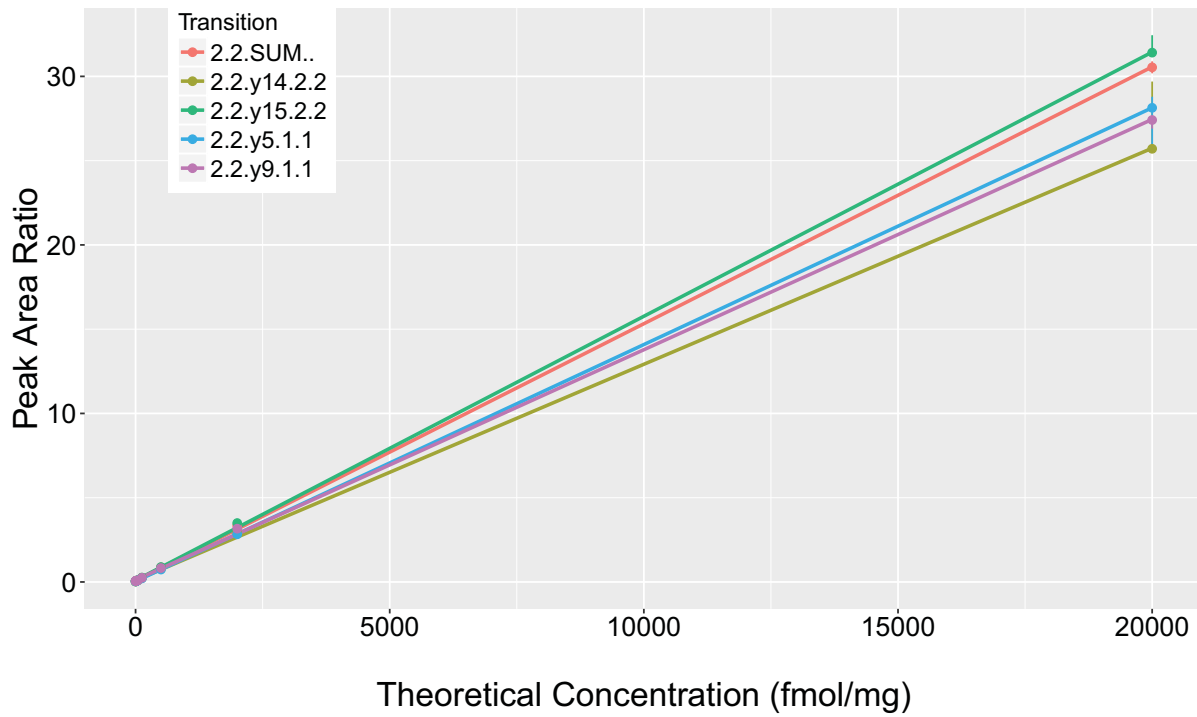

Analyte: sp|Q14676|MDC1\_HUMAN.AQPFGFIDSDTDAAEEER

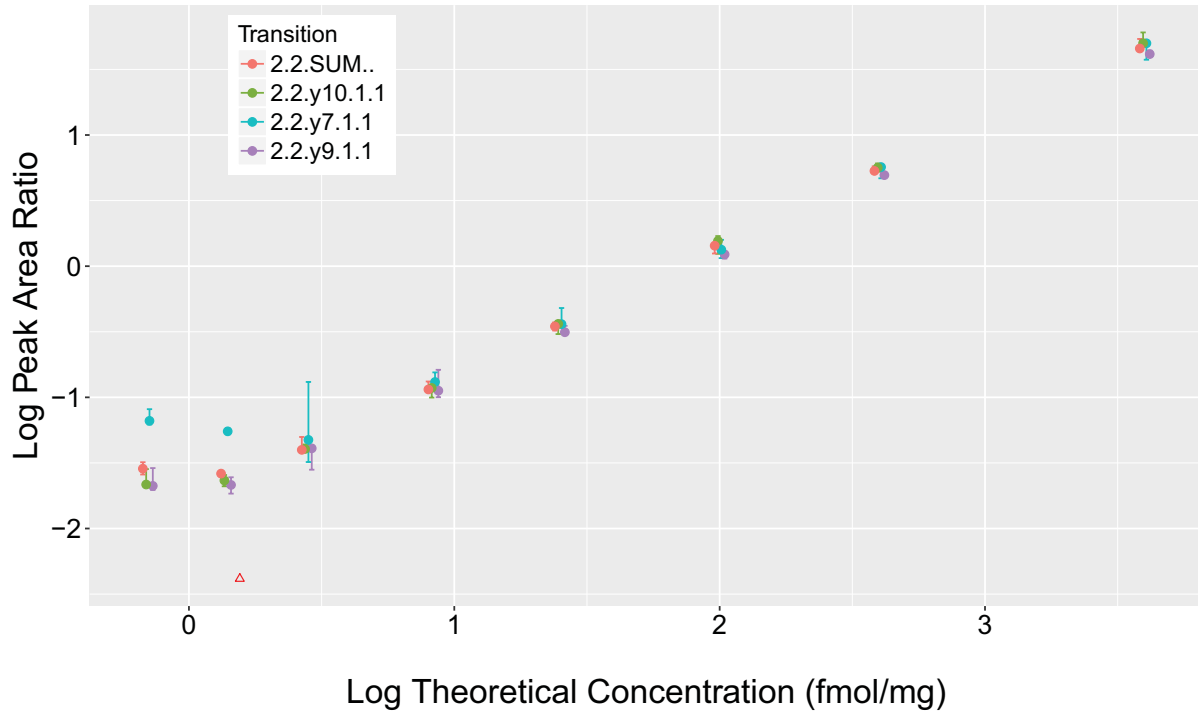

Analyte: sp|Q14676|MDC1\_HUMAN.AQPFGFIDSDTDAAEEER

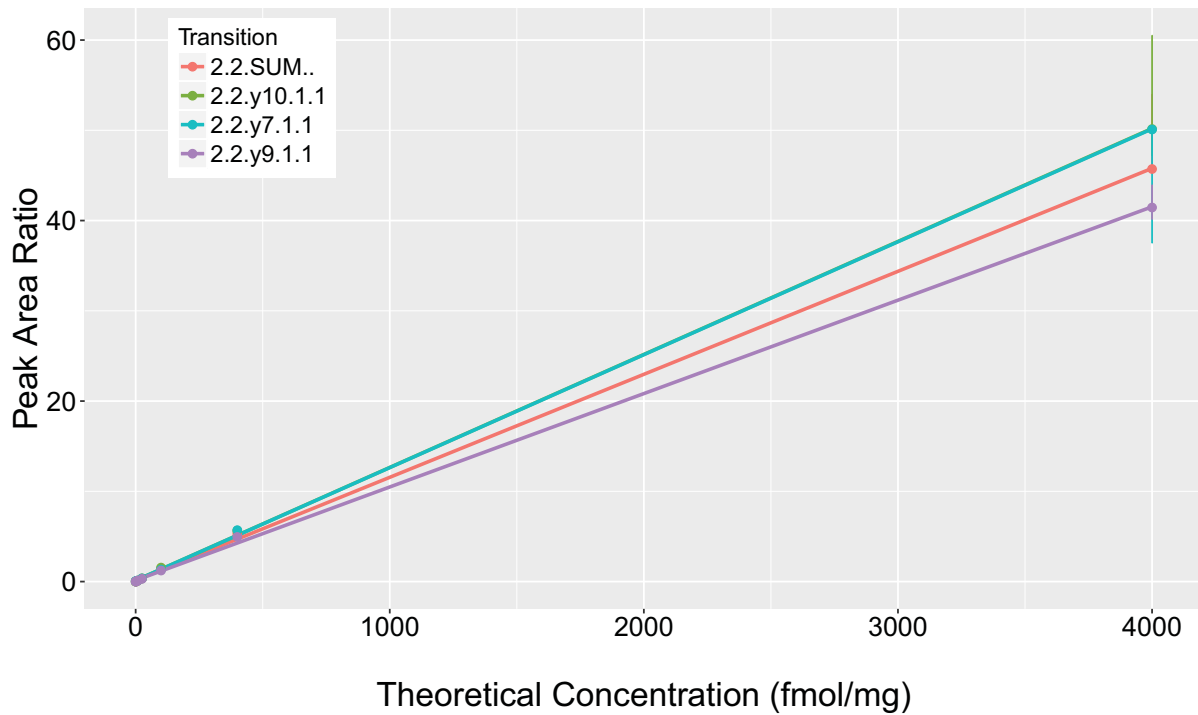

Analyte: sp|Q9NPD8|UBE2T\_HUMAN.AS[+80]QLVGI EK

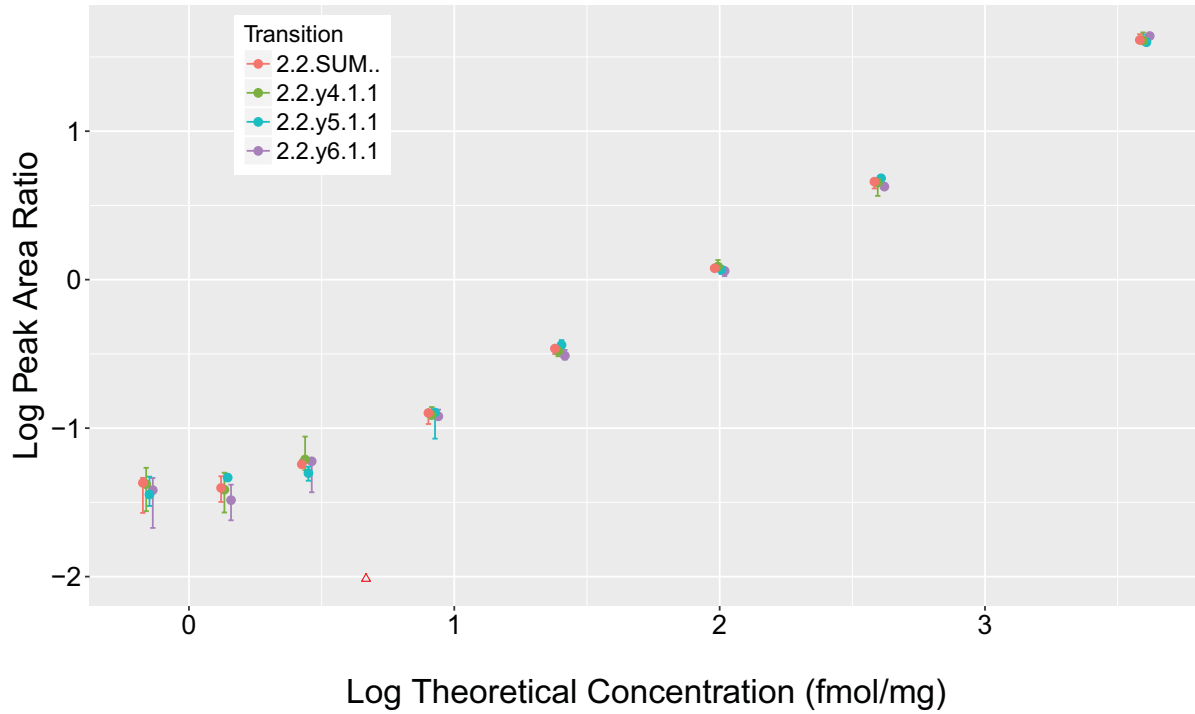

Analyte: sp|Q9NPD8|UBE2T\_HUMAN.AS[+80]QLVGI EK

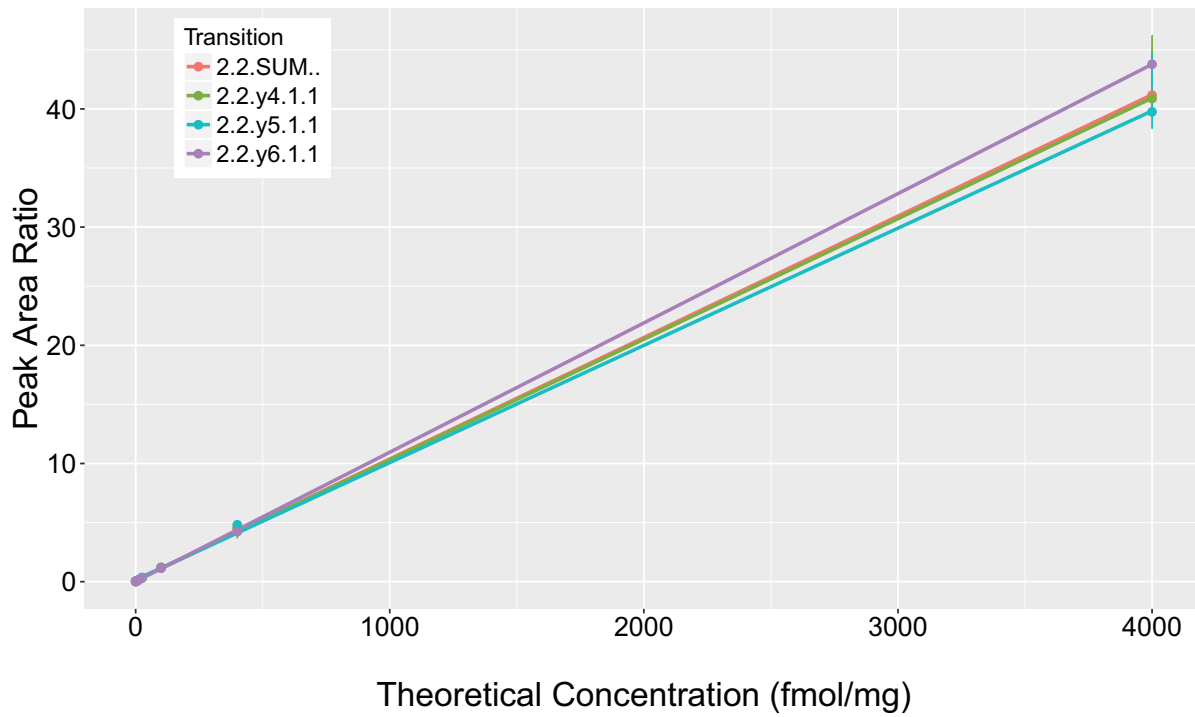

Analyte: sp|Q5UIP0|RIF1\_HUMAN.ASQGLSSIENSESDSSEAK

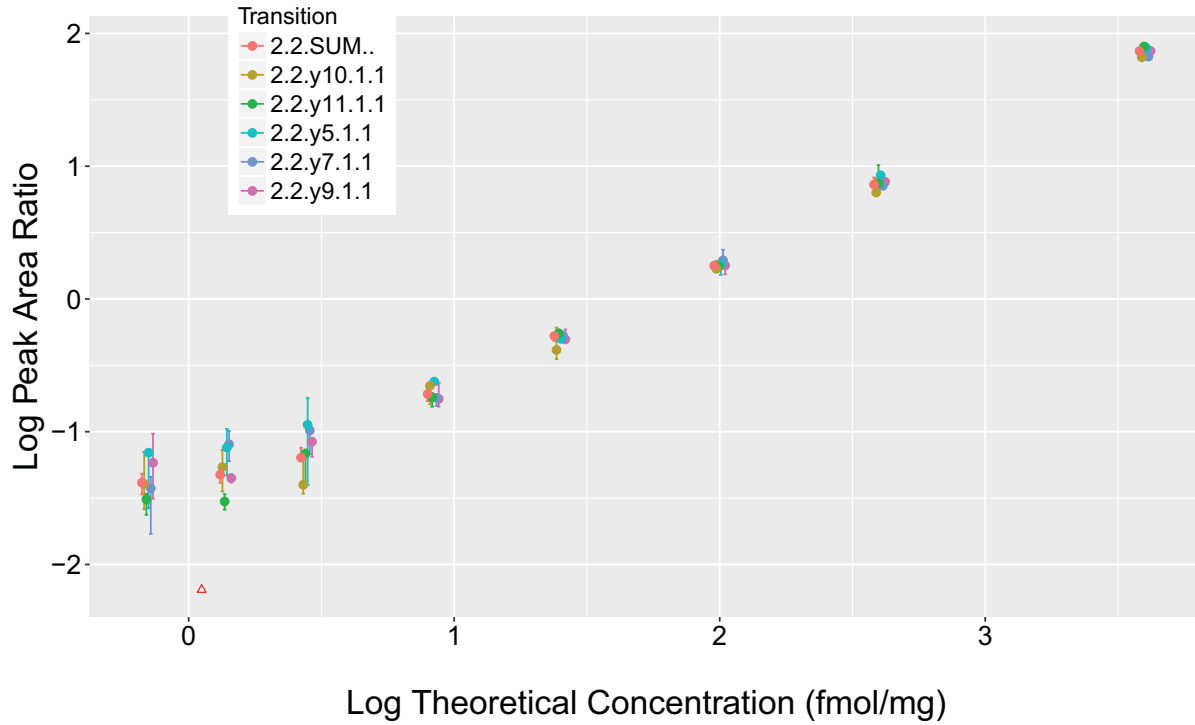

Analyte: sp|Q5UIP0|RIF1\_HUMAN.ASQGLSSIENSESDSSEAK

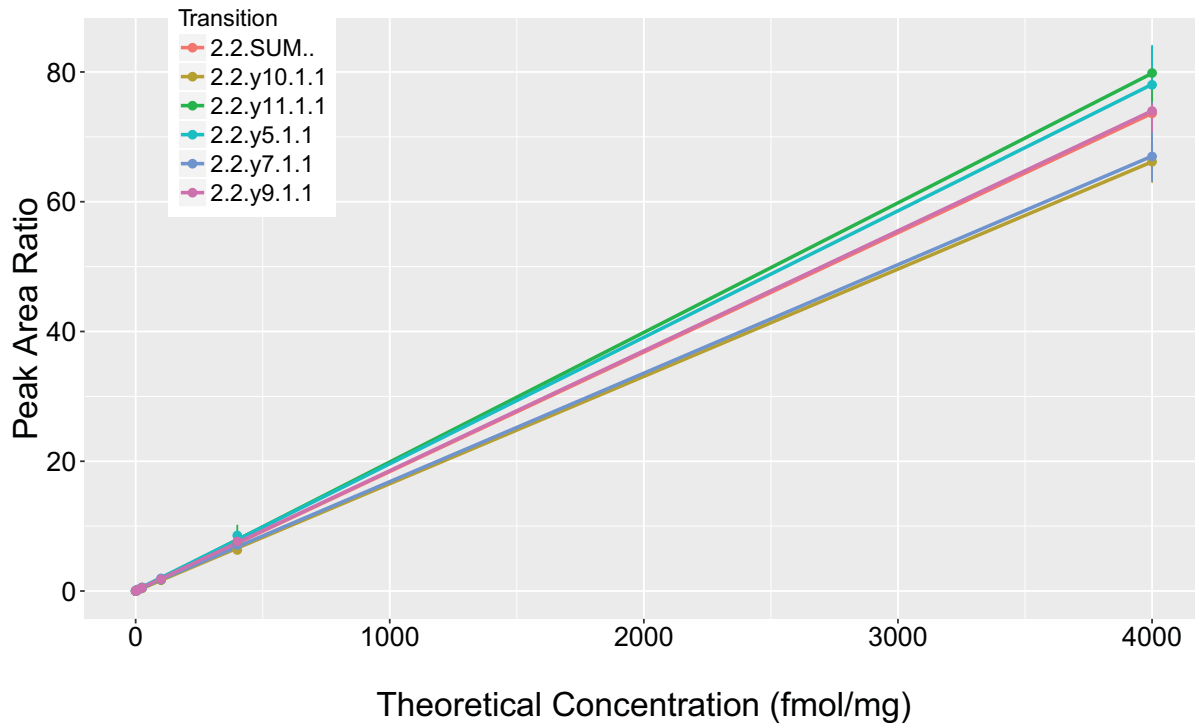

Analyte: sp|Q9NPD8|UBE2T\_HUMAN.ASQLVGIEK

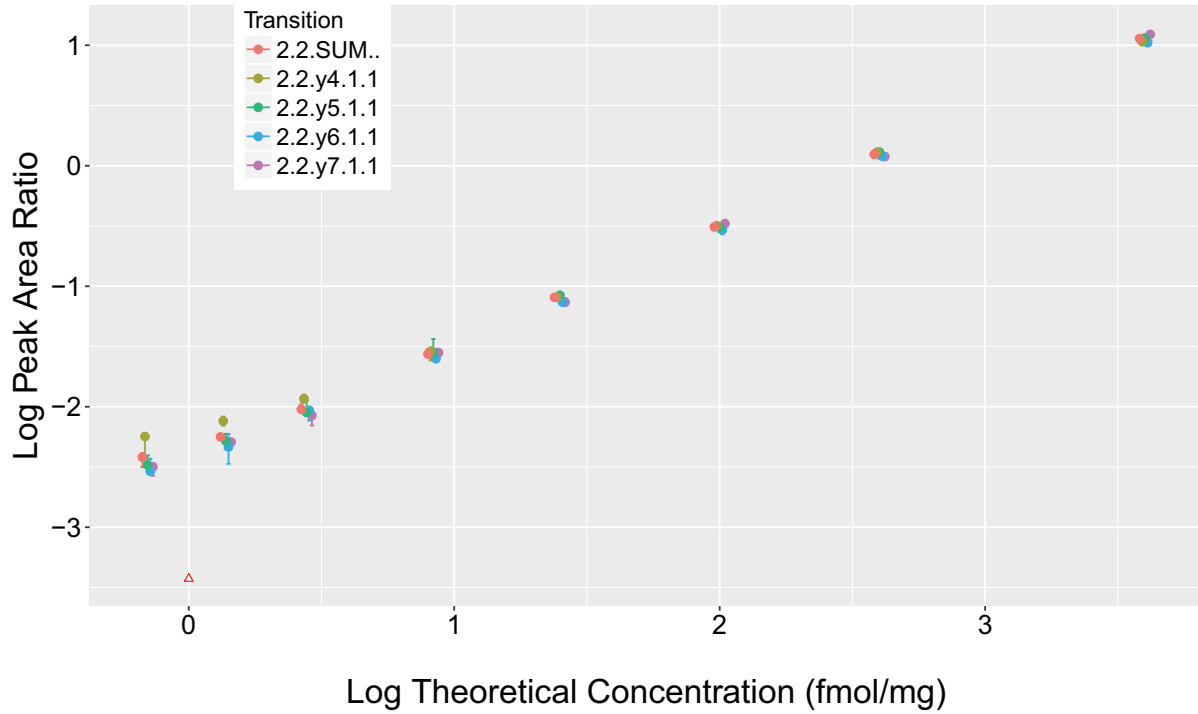

Analyte: sp|Q9NPD8|UBE2T\_HUMAN.ASQLVGIEK

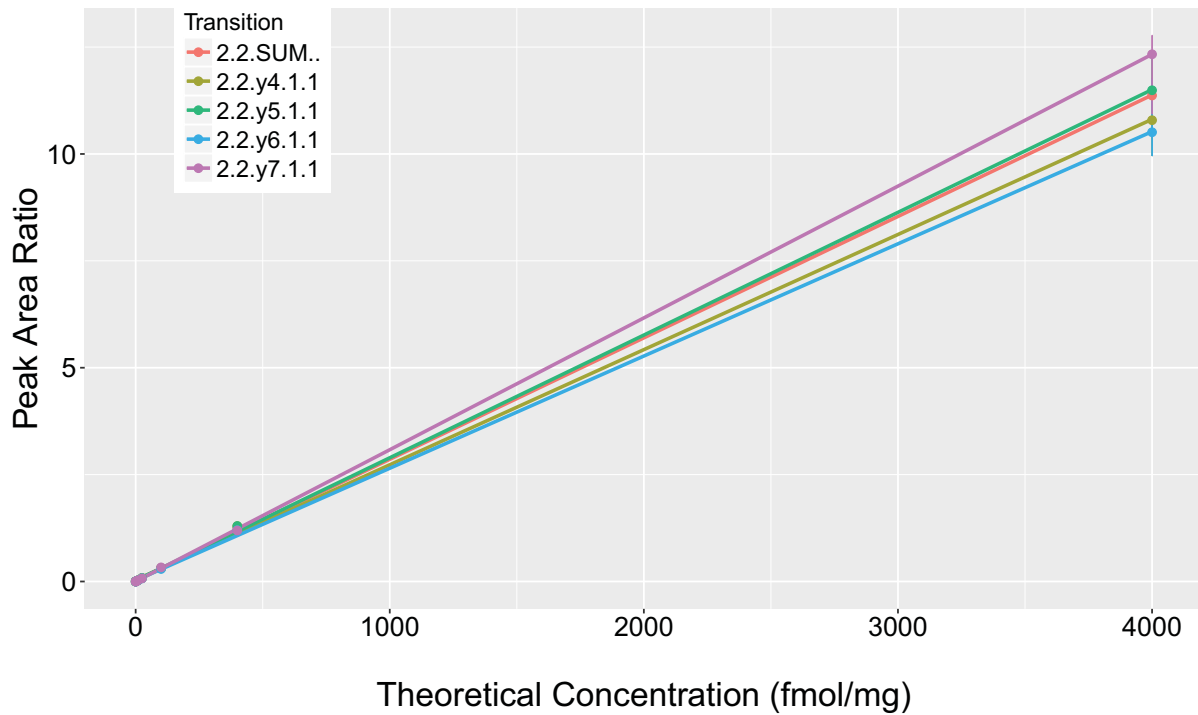



Analyte: sp|Q9BX63|FANCI\_HUMAN.ATPELGSSSENSASS[+80]PPR

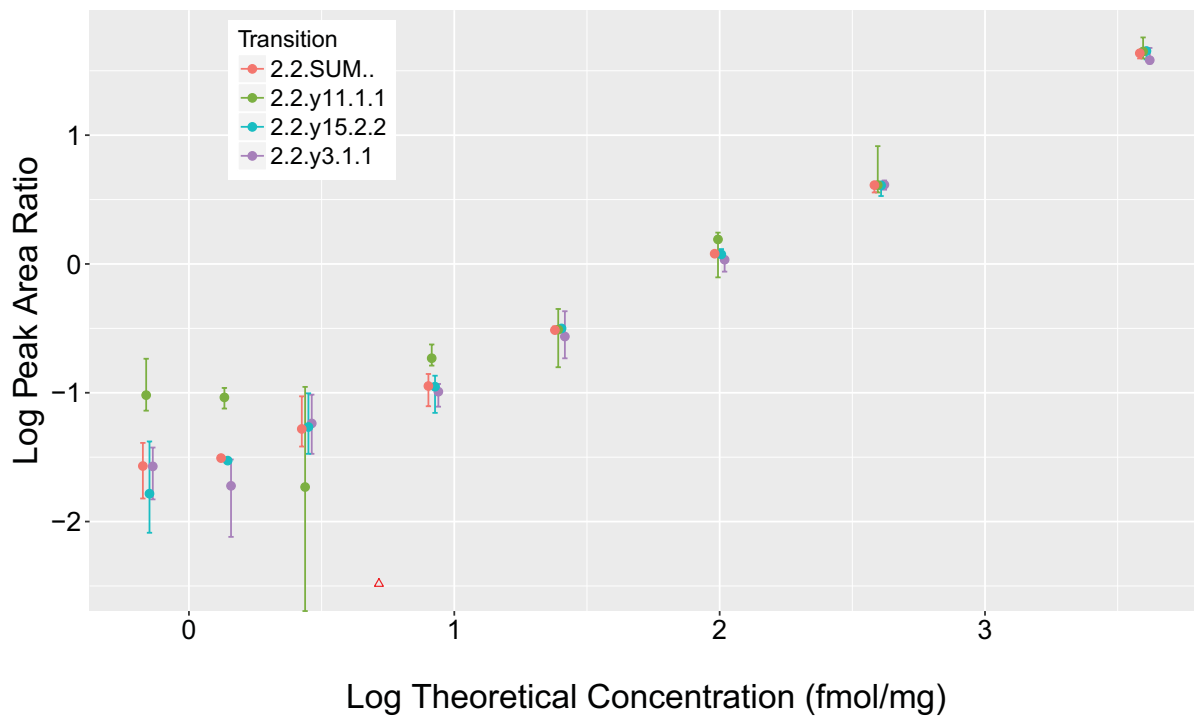

Analyte: sp|Q9BX63|FANCI\_HUMAN.ATPELGSSSENSASS[+80]PPR

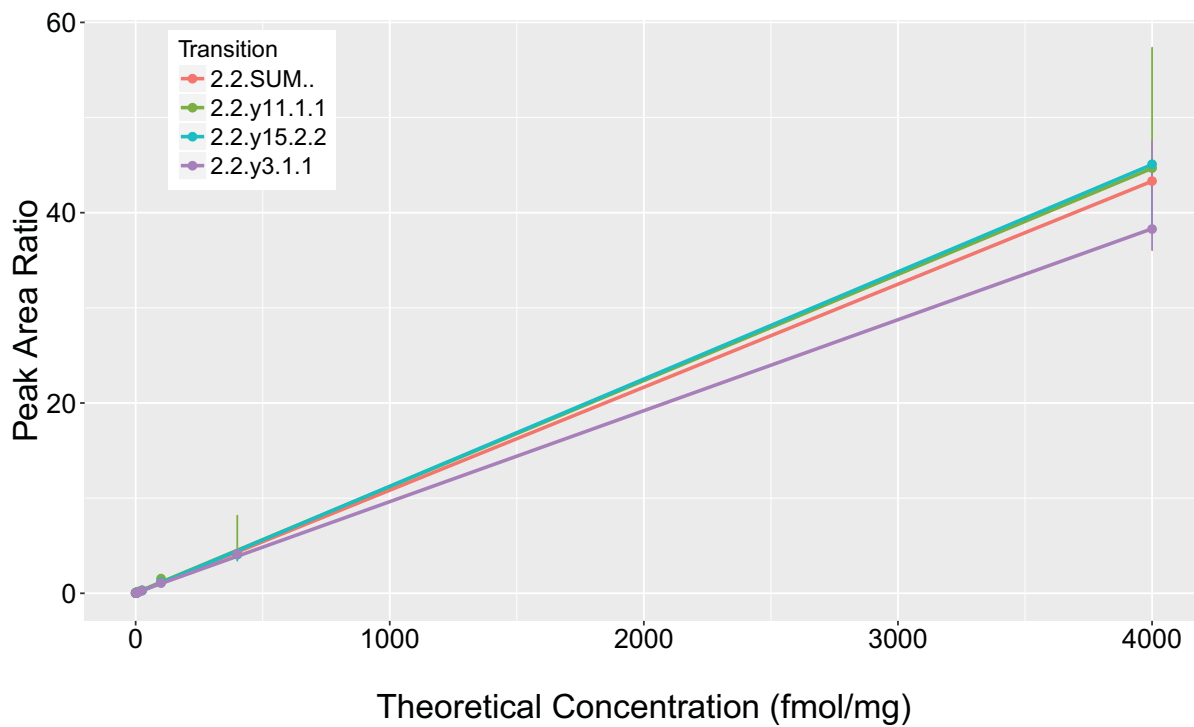

Analyte: sp|Q9BX63|FANCJ\_HUMAN.ATPELGSSSENSASSPPR

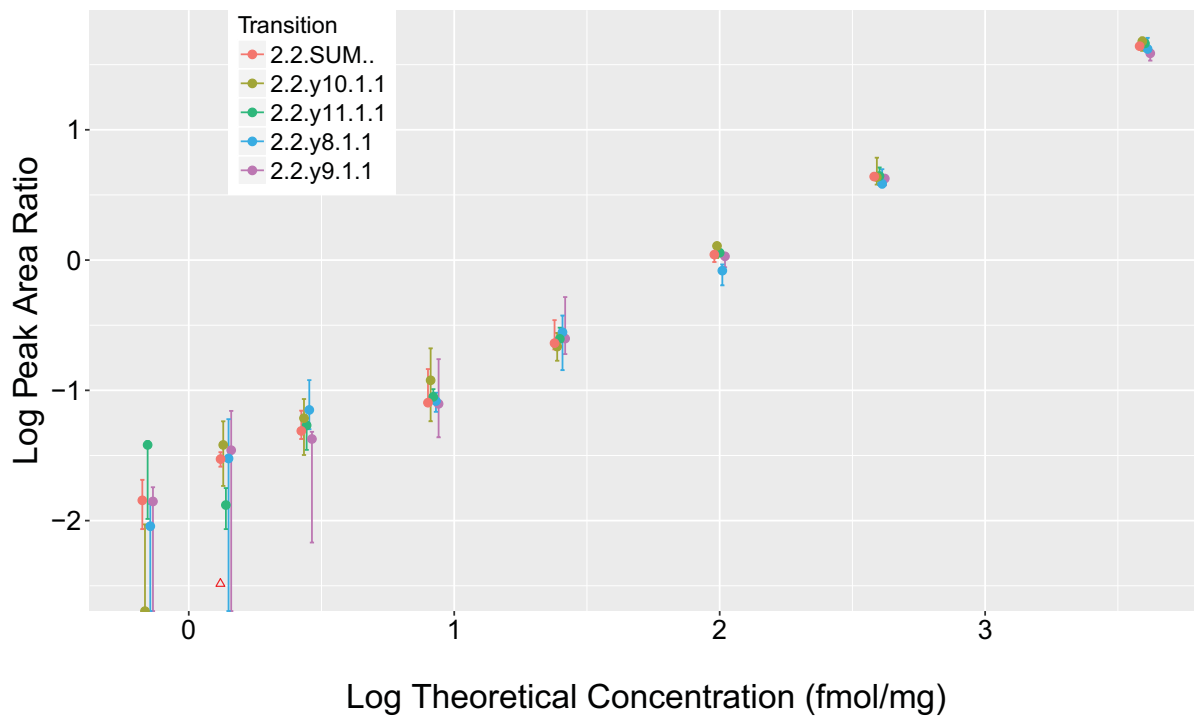

Analyte: sp|Q9BX63|FANCJ\_HUMAN.ATPELGSSSENSASSPPR

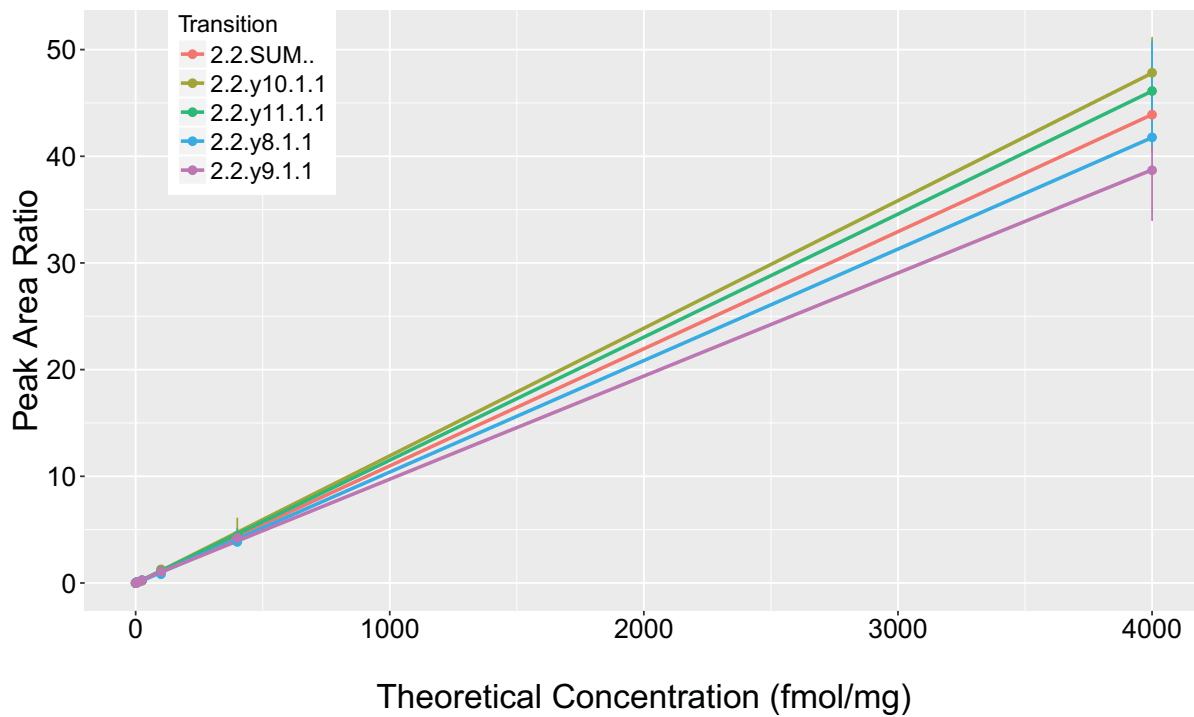

Analyte: sp|P63279|UBC9\_HUMAN.DHPFGFVAVPTK

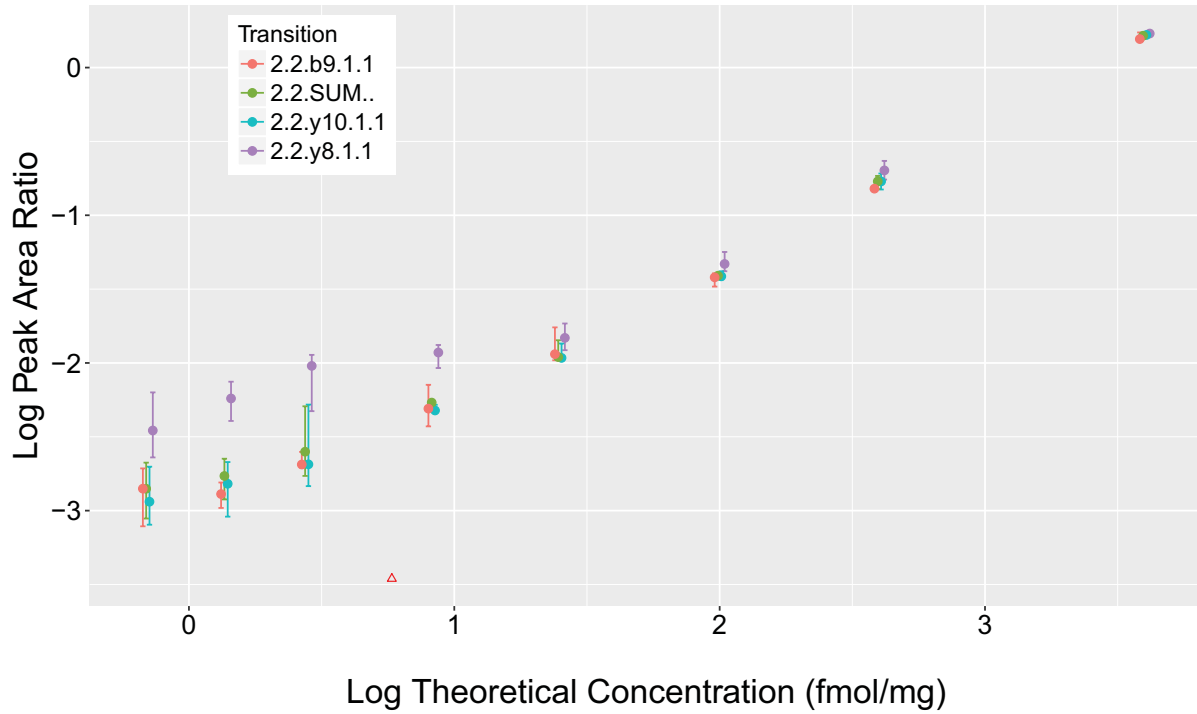

Analyte: sp|P63279|UBC9\_HUMAN.DHPFGFVAVPTK

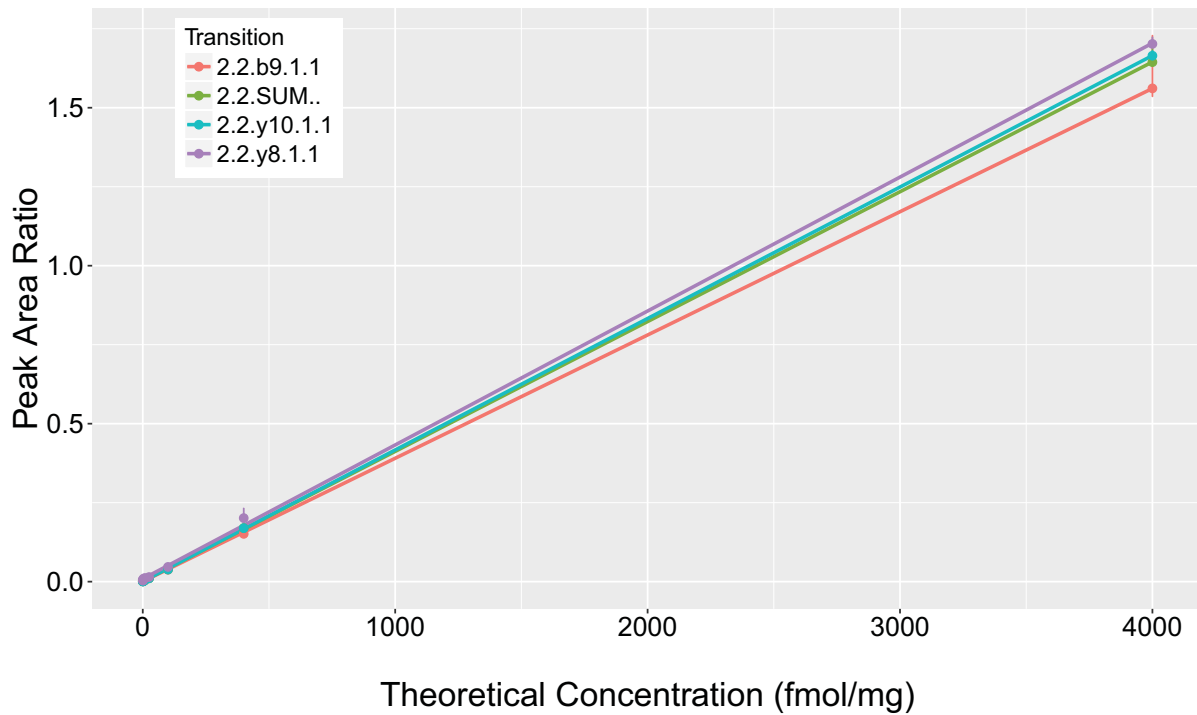

Analyte: sp|P12004|PCNA\_HUMAN.DLSHIGDAVVISC[+57]AK[+114]

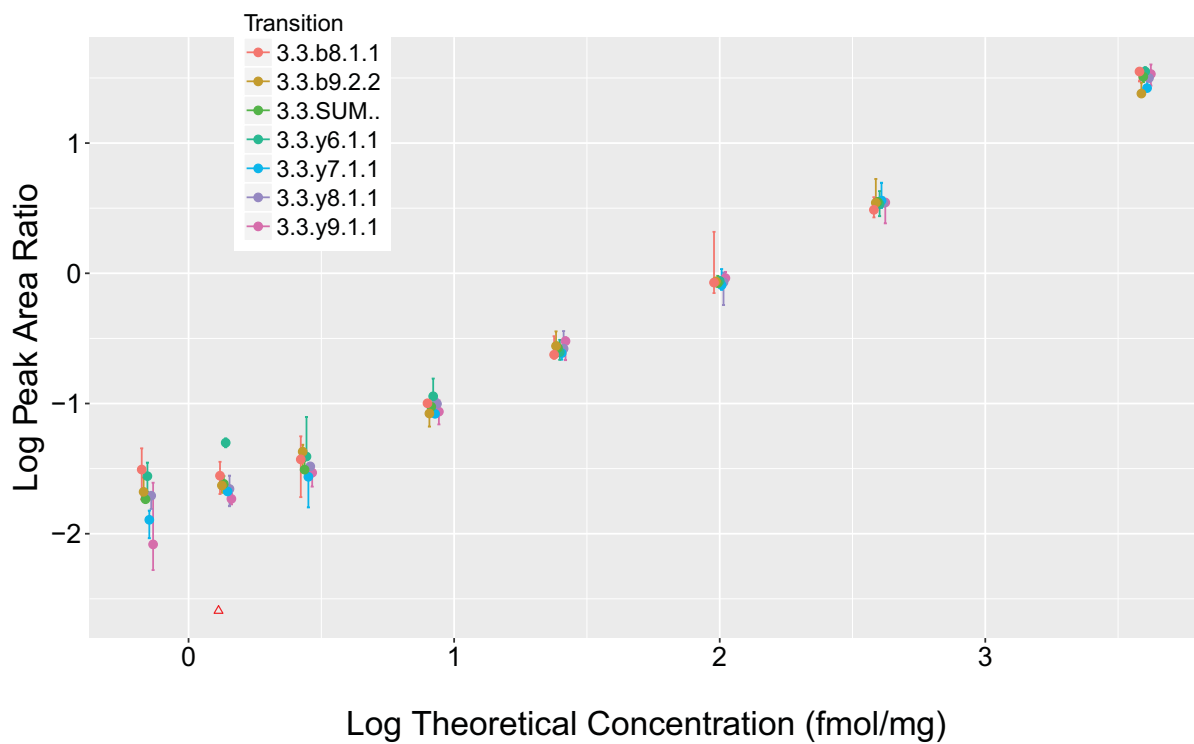

Analyte: sp|P12004|PCNA\_HUMAN.DLSHIGDAVVISC[+57]AK[+114]

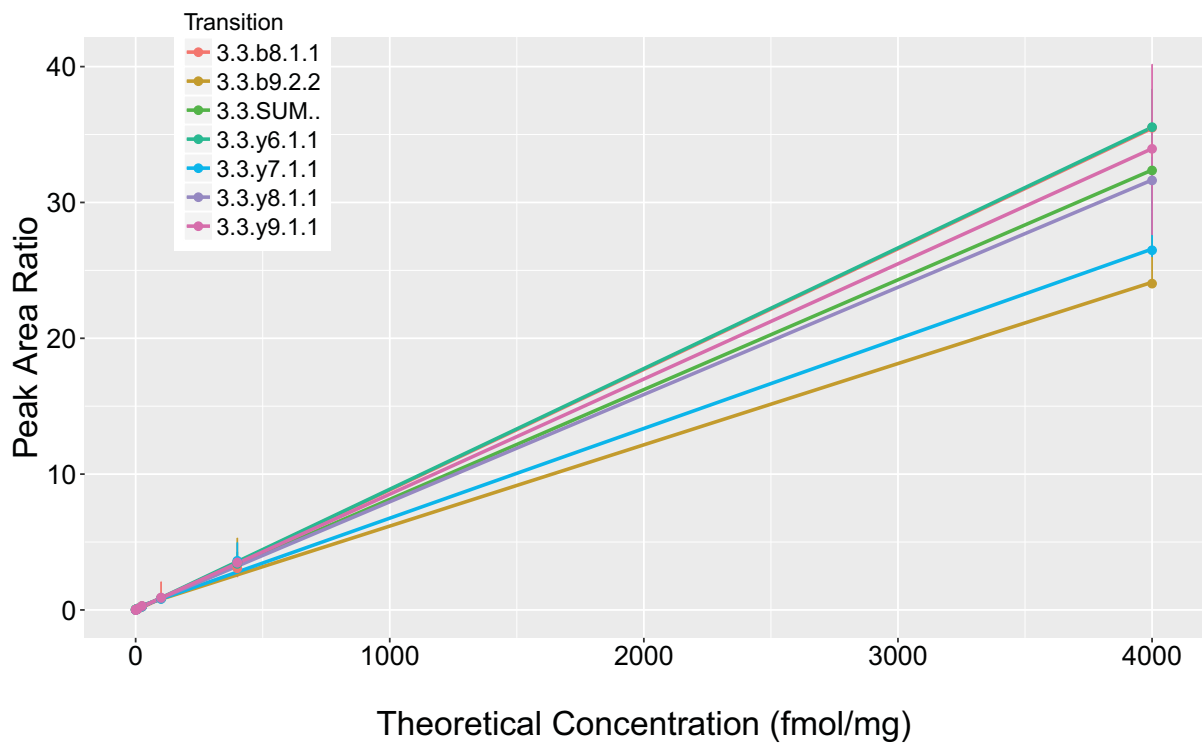

Analyte: sp|P12004|PCNA\_HUMAN.DLSHIGDAVVISC[+57]AK

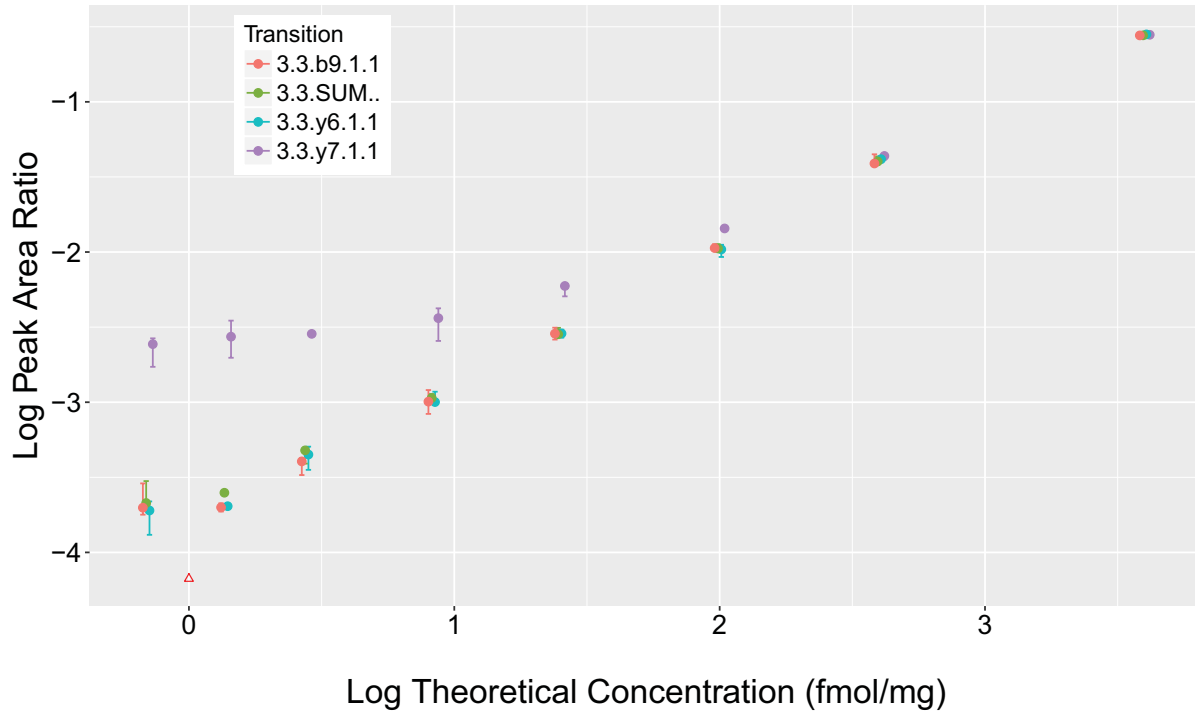

Analyte: sp|P12004|PCNA\_HUMAN.DLSHIGDAVVISC[+57]AK

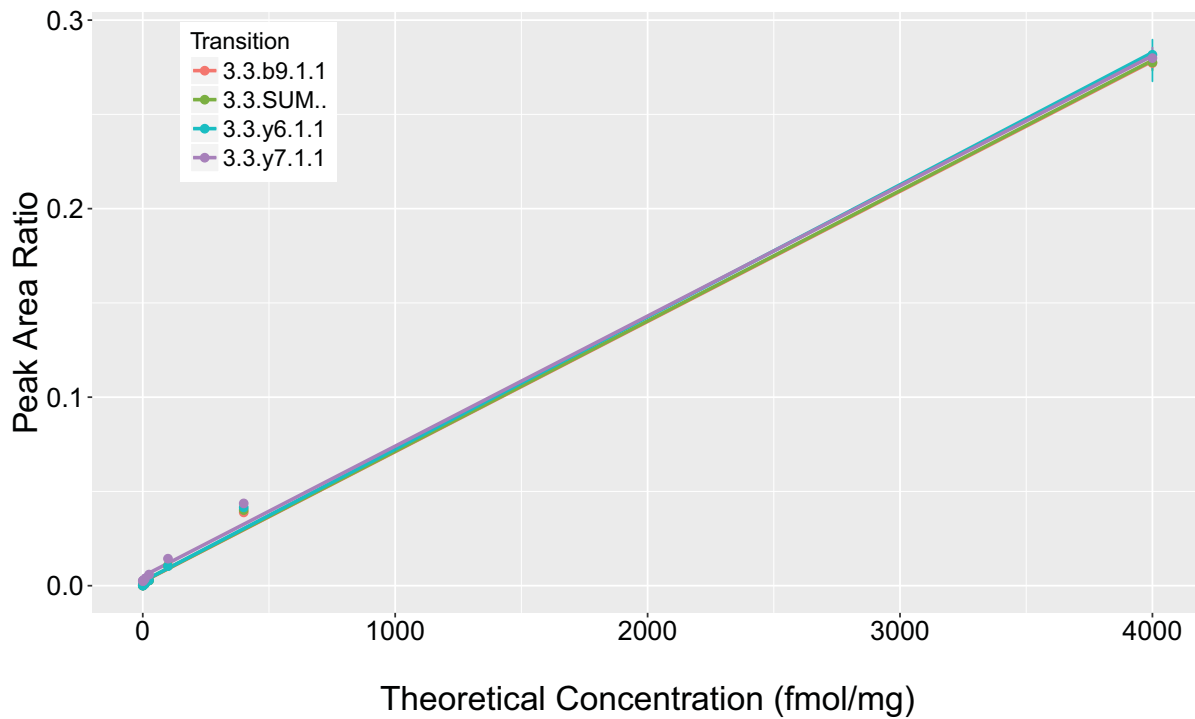

Analyte: sp|Q15554|TERF2\_HUMAN.DLVLPQTQALPAS[+80]PALK

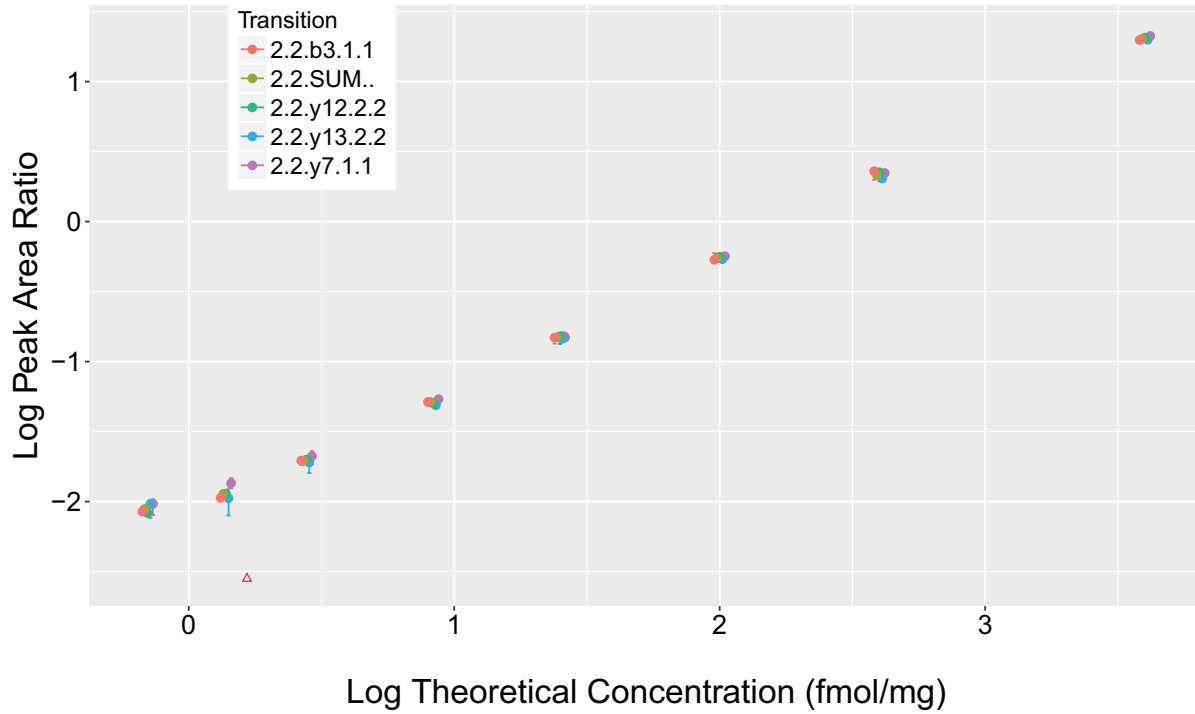

Analyte: sp|Q15554|TERF2\_HUMAN.DLVLPQTQALPAS[+80]PALK

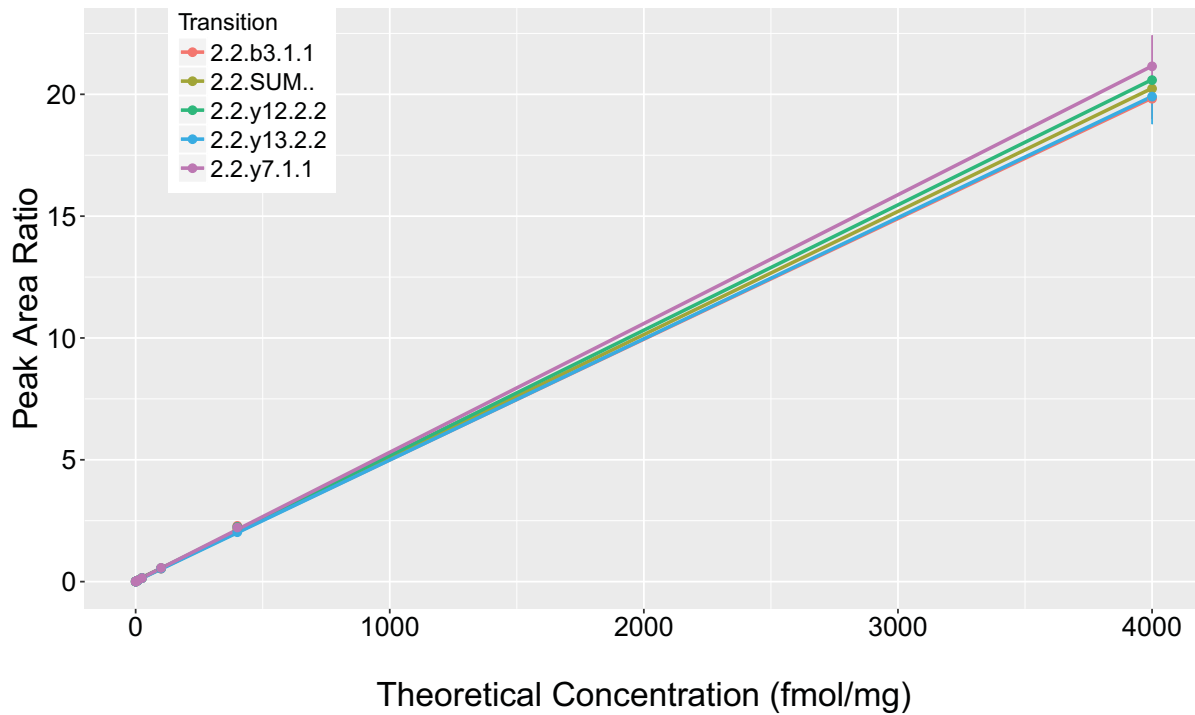

Analyte: sp|Q15554|TERF2\_HUMAN.DLVLPQTQALPASPALK

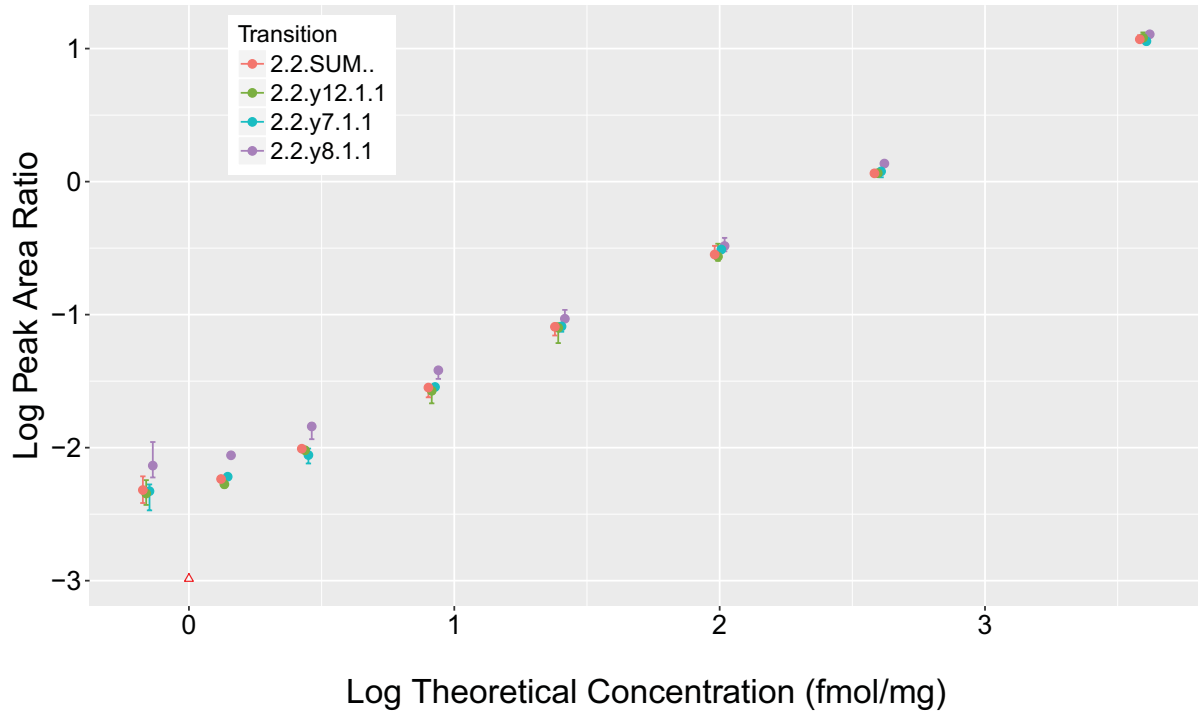

Analyte: sp|Q15554|TERF2\_HUMAN.DLVLPQTQALPASPALK

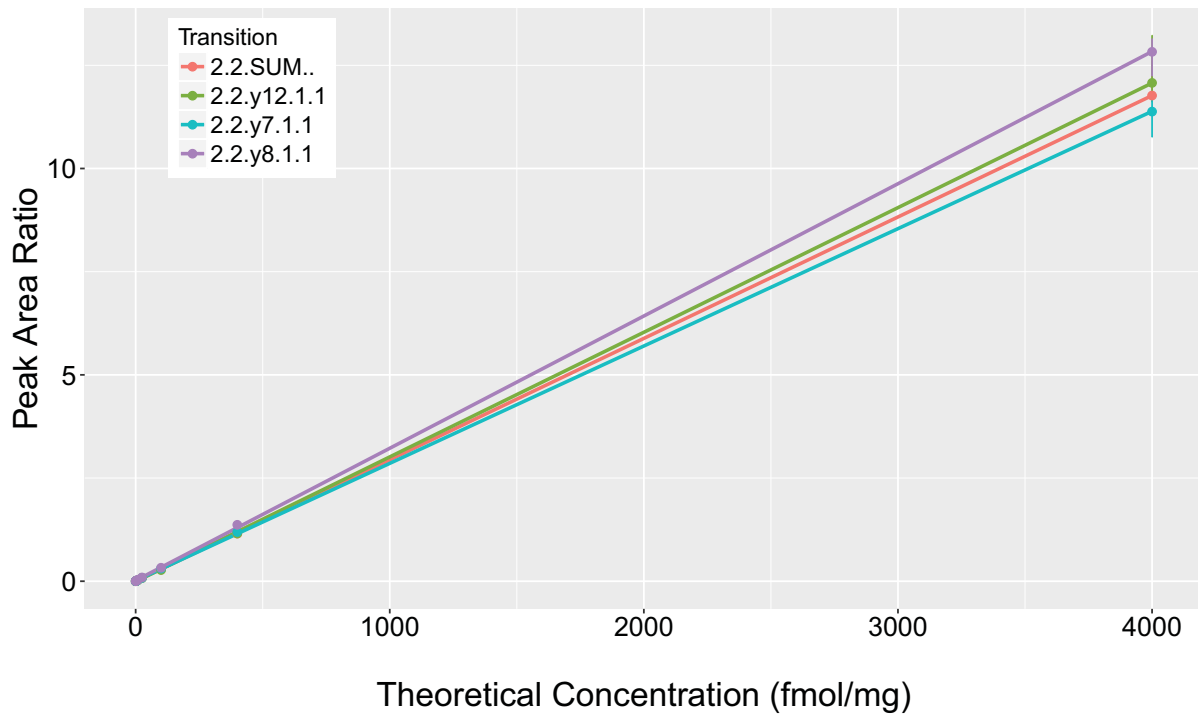

Analyte: sp|O43502|RA51C\_HUMAN.DLVSFPLS[+80]PAVR

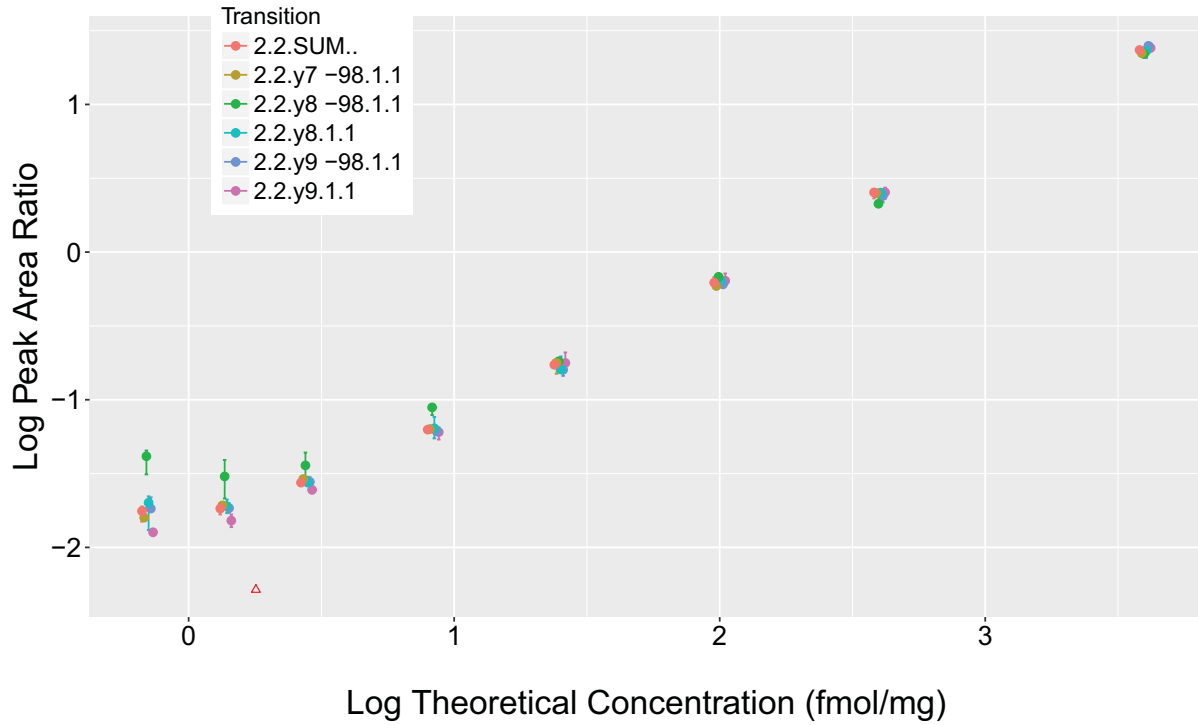

Analyte: sp|O43502|RA51C\_HUMAN.DLVSFPLS[+80]PAVR

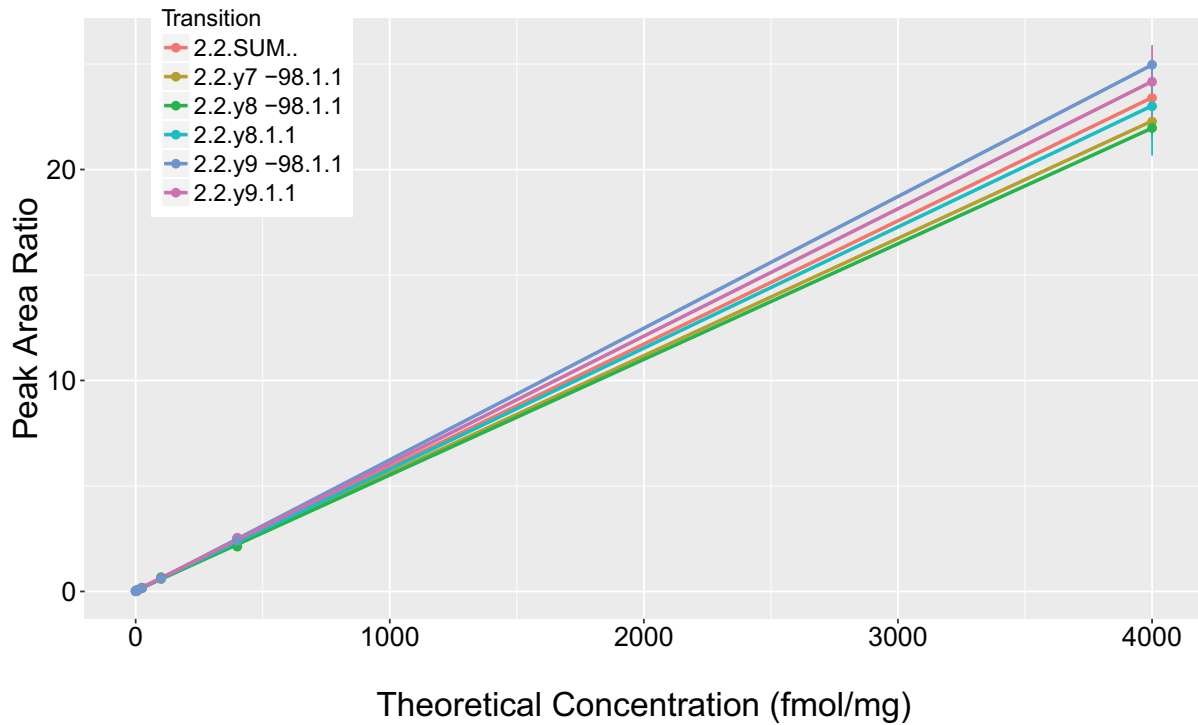



Analyte: sp|O43502|RA51C\_HUMAN.DLVSFPLSPAVR

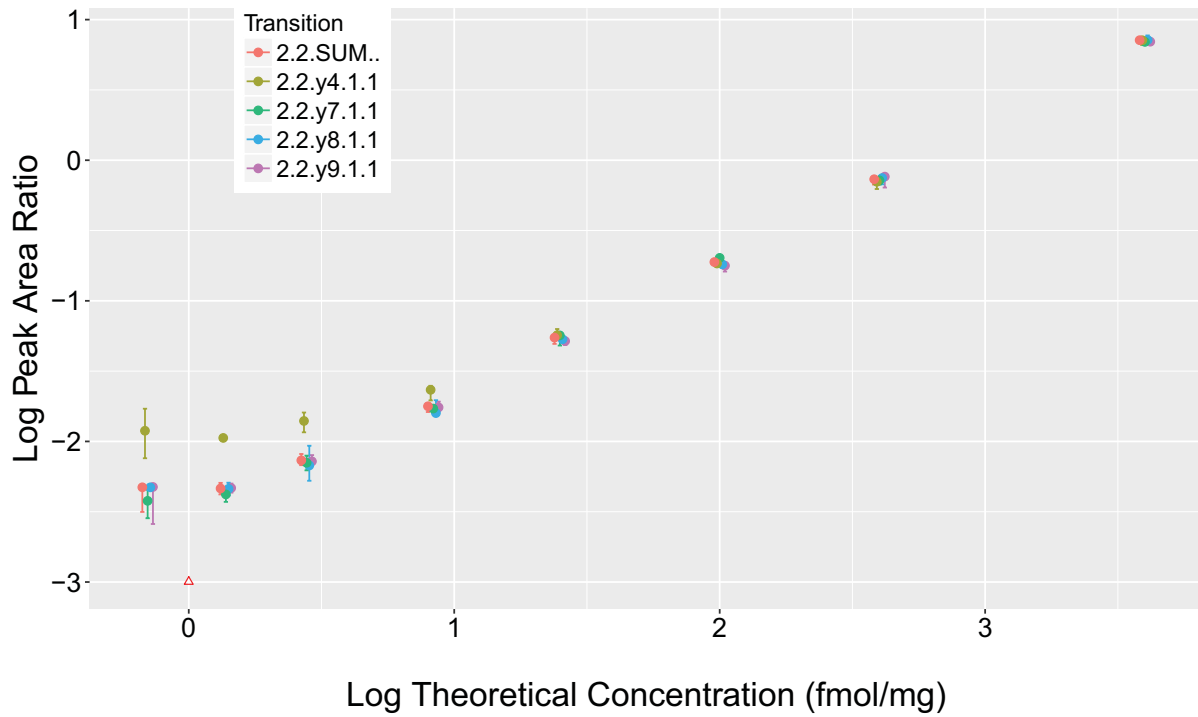

Analyte: sp|O43502|RA51C\_HUMAN.DLVSFPLSPAVR

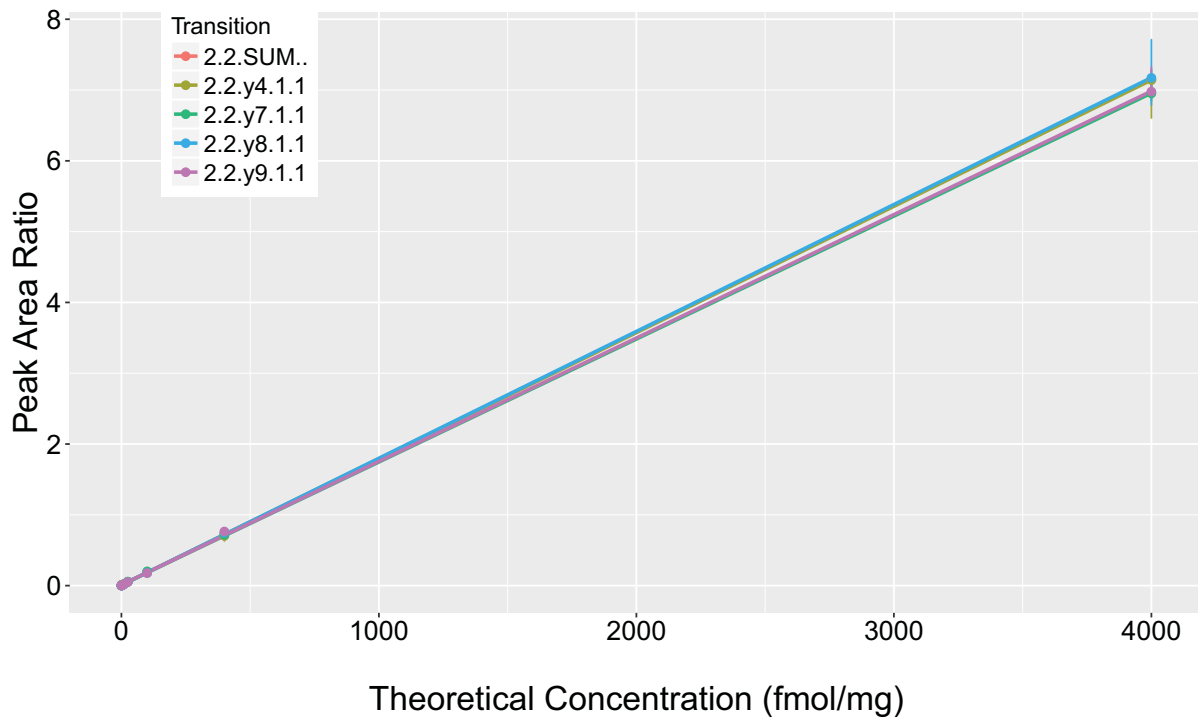

Analyte: sp|P09874|PARP1\_HUMAN.EELGFRPEYS[+80]ASQLK

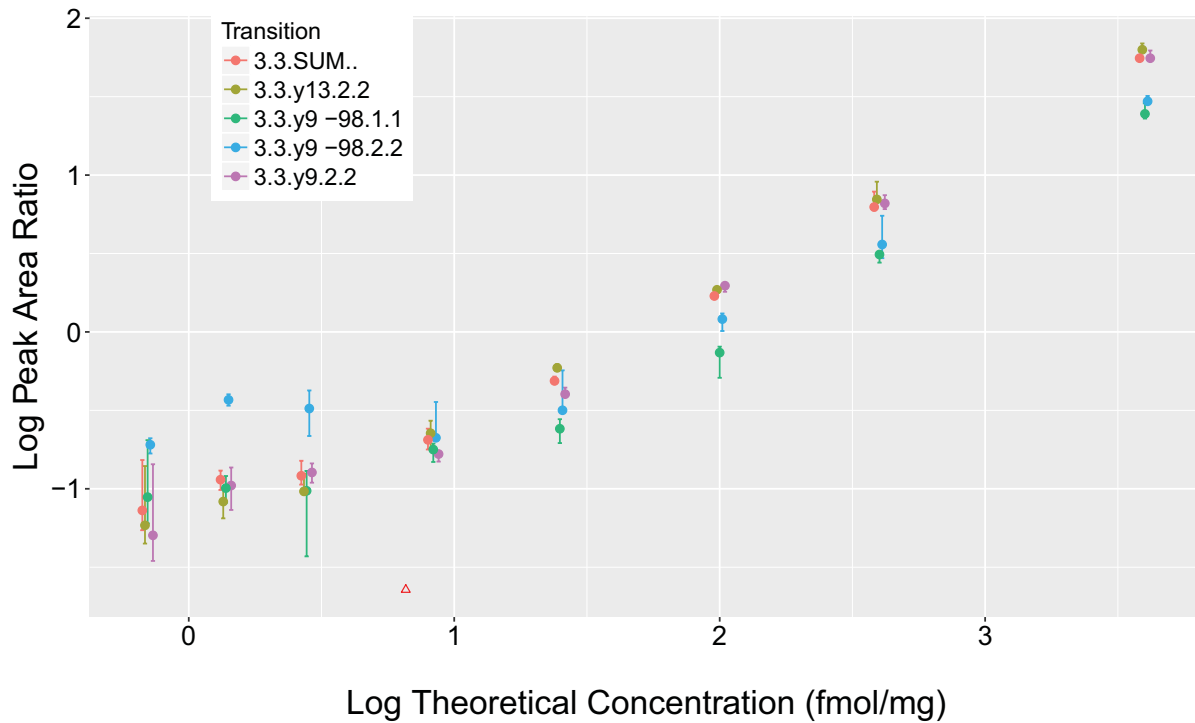

Analyte: sp|P09874|PARP1\_HUMAN.EELGFRPEYS[+80]ASQLK

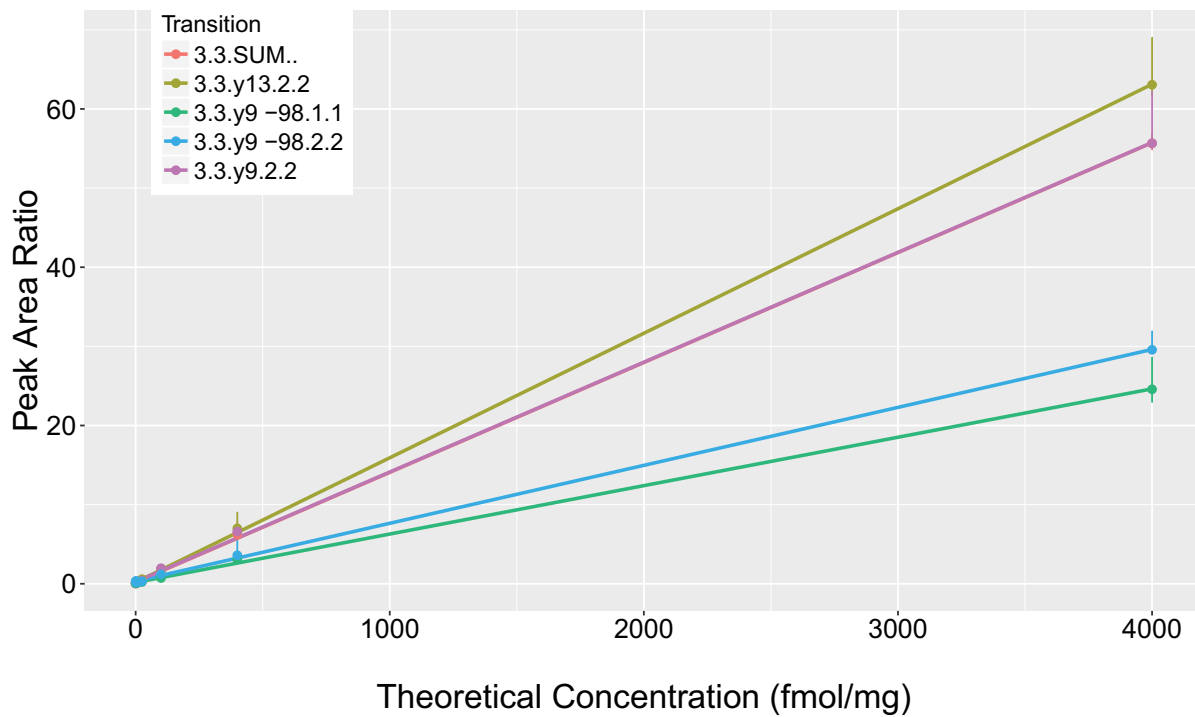

Analyte: sp|P09874|PARP1\_HUMAN.EELGFRPEYSASQLK

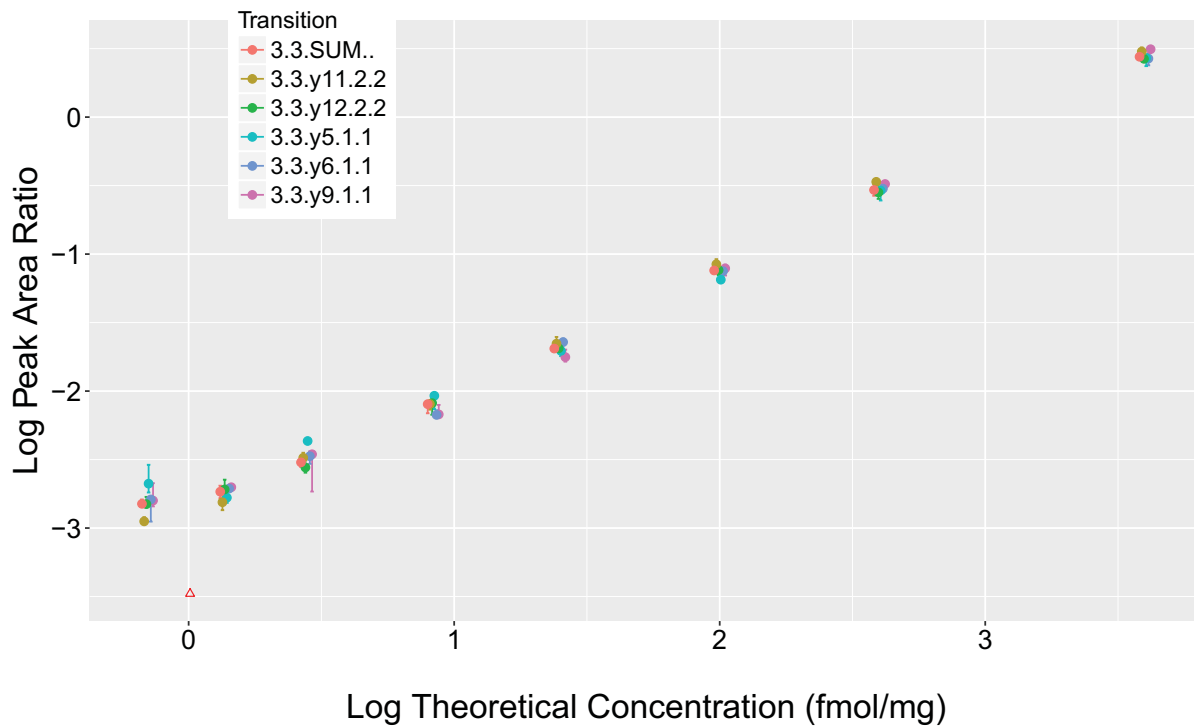

Analyte: sp|P09874|PARP1\_HUMAN.EELGFRPEYSASQLK

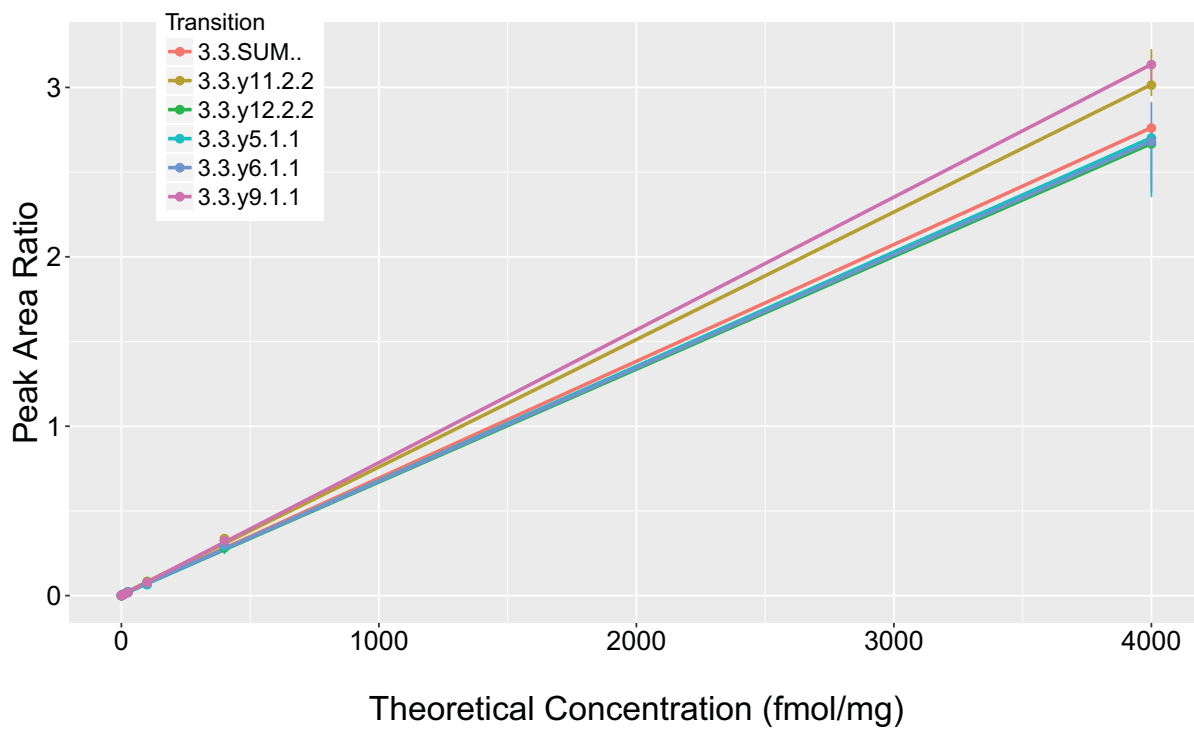

Analyte: sp|O00762|UBE2C\_HUMAN.GISAFPESDNLFK

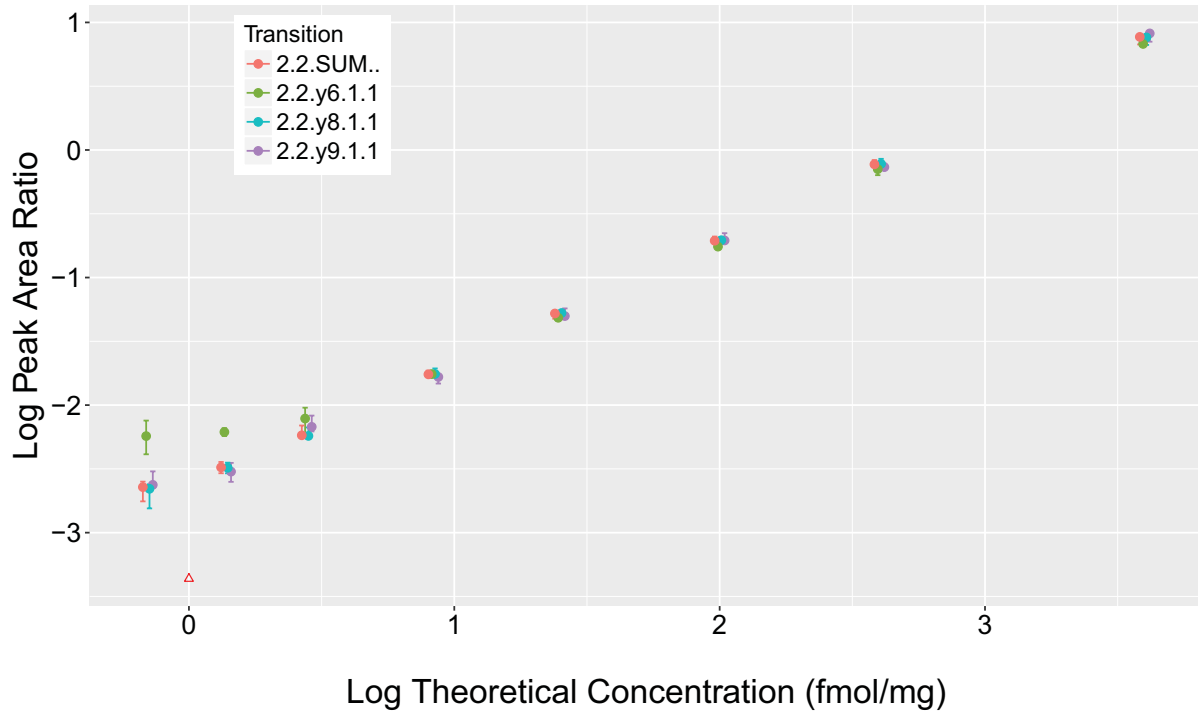

Analyte: sp|O00762|UBE2C\_HUMAN.GISAFPESDNLFK

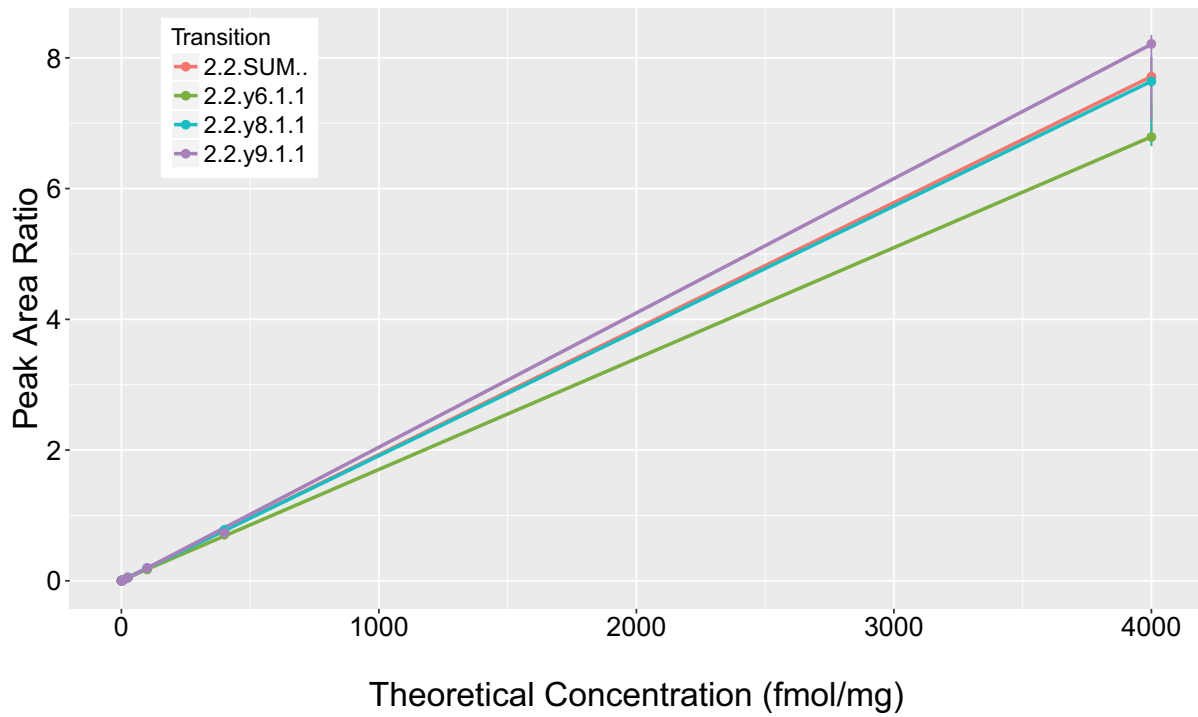

Analyte: sp|Q13535|ATR\_HUMAN.GVELLC[+57]FPENET[+80]PPEGK

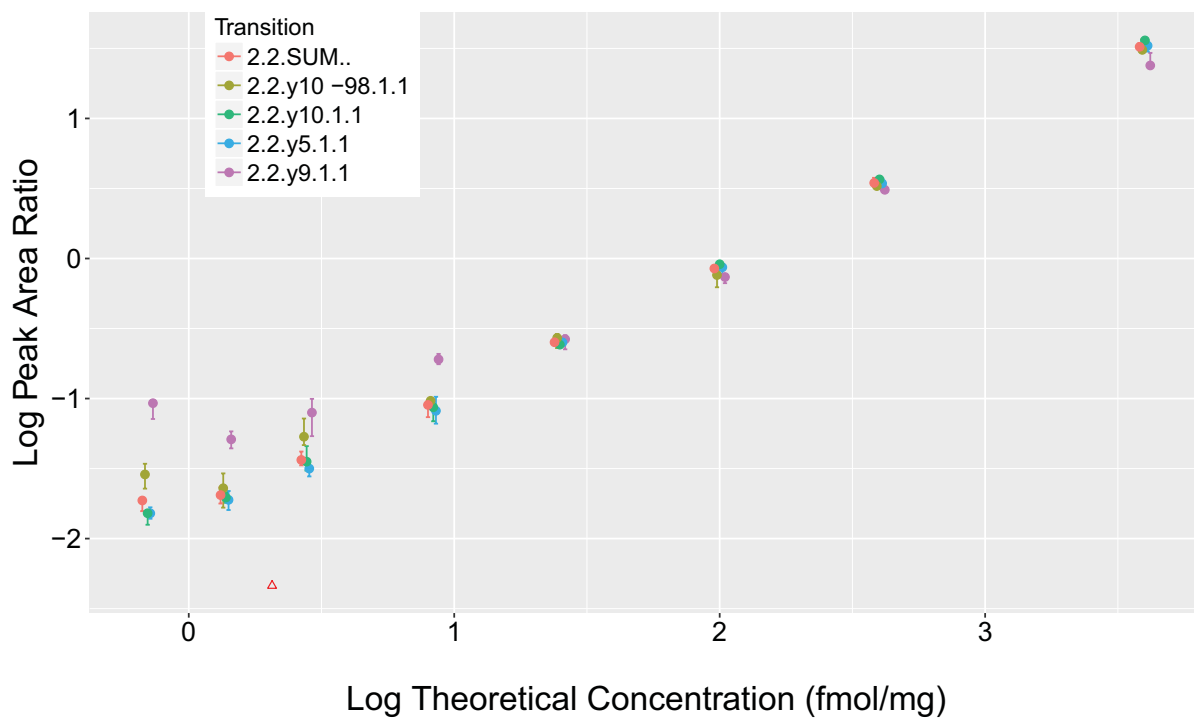

Analyte: sp|Q13535|ATR\_HUMAN.GVELLC[+57]FPENET[+80]PPEGK

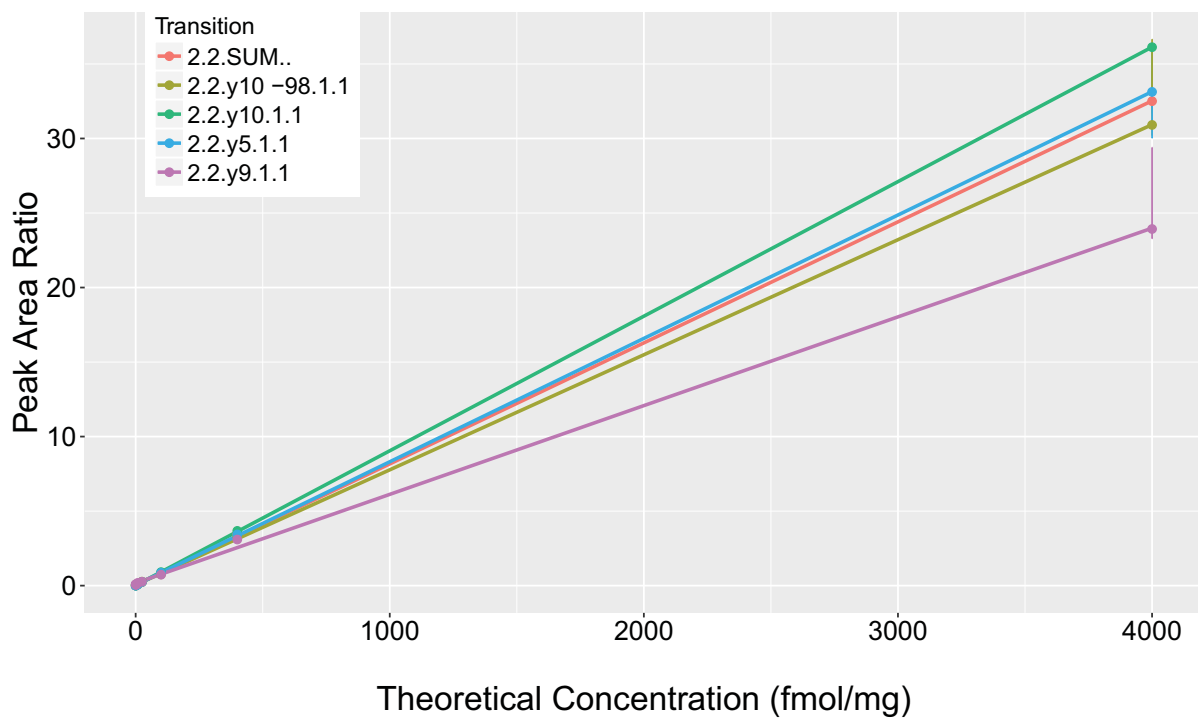

Analyte: sp|Q13535|ATR\_HUMAN.GVELC[+57]FPENETPPEGK

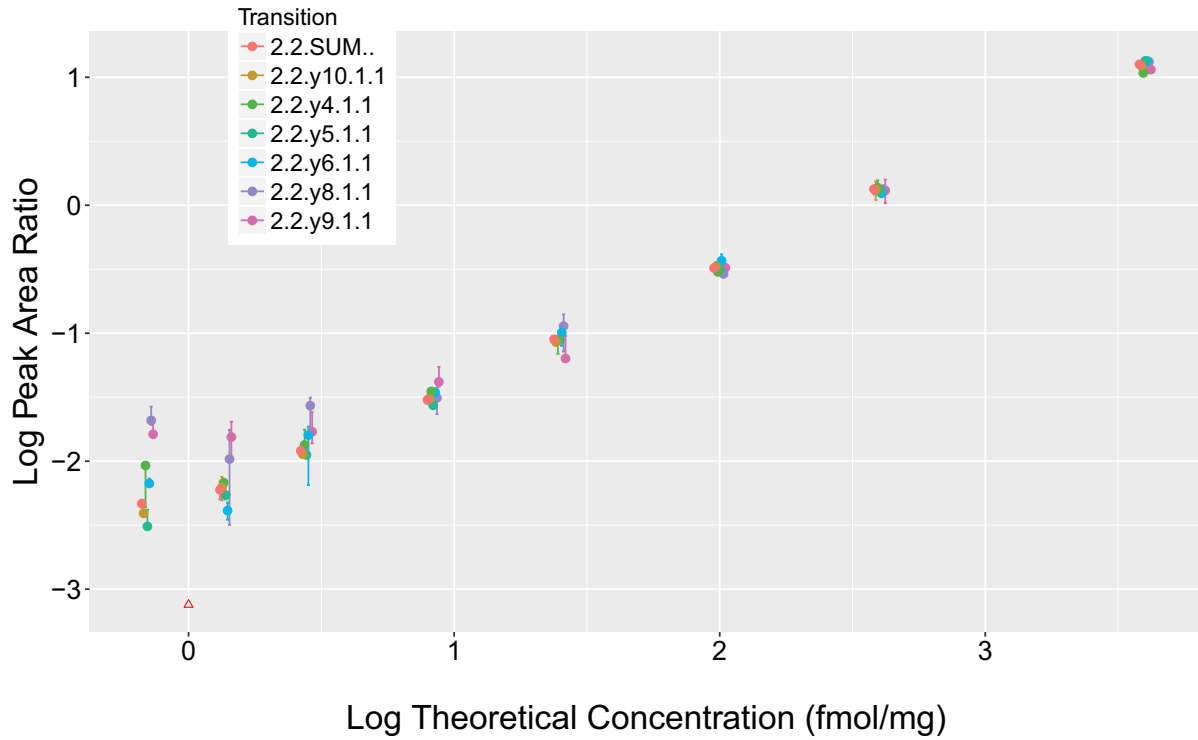

Analyte: sp|Q13535|ATR\_HUMAN.GVELC[+57]FPENETPPEGK

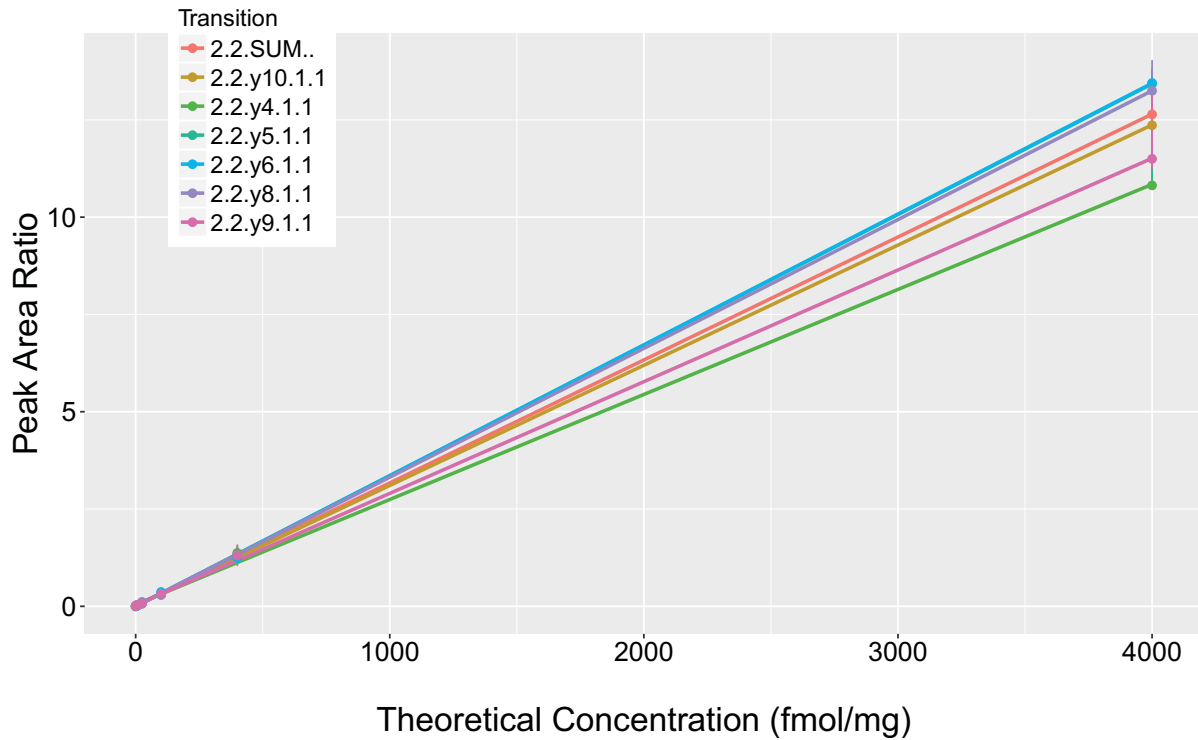

Analyte: sp|Q92547|TOPB1\_HUMAN.GVLT[+80]QTLEMR

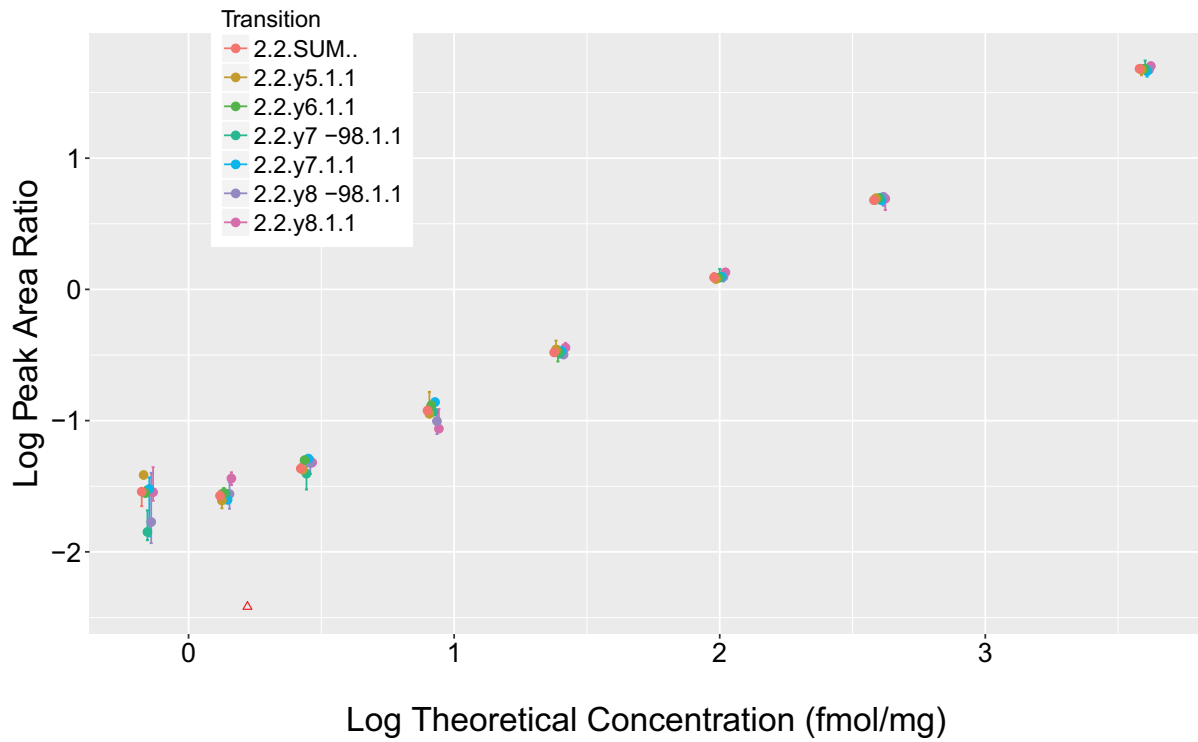

Analyte: sp|Q92547|TOPB1\_HUMAN.GVLT[+80]QTLEMR

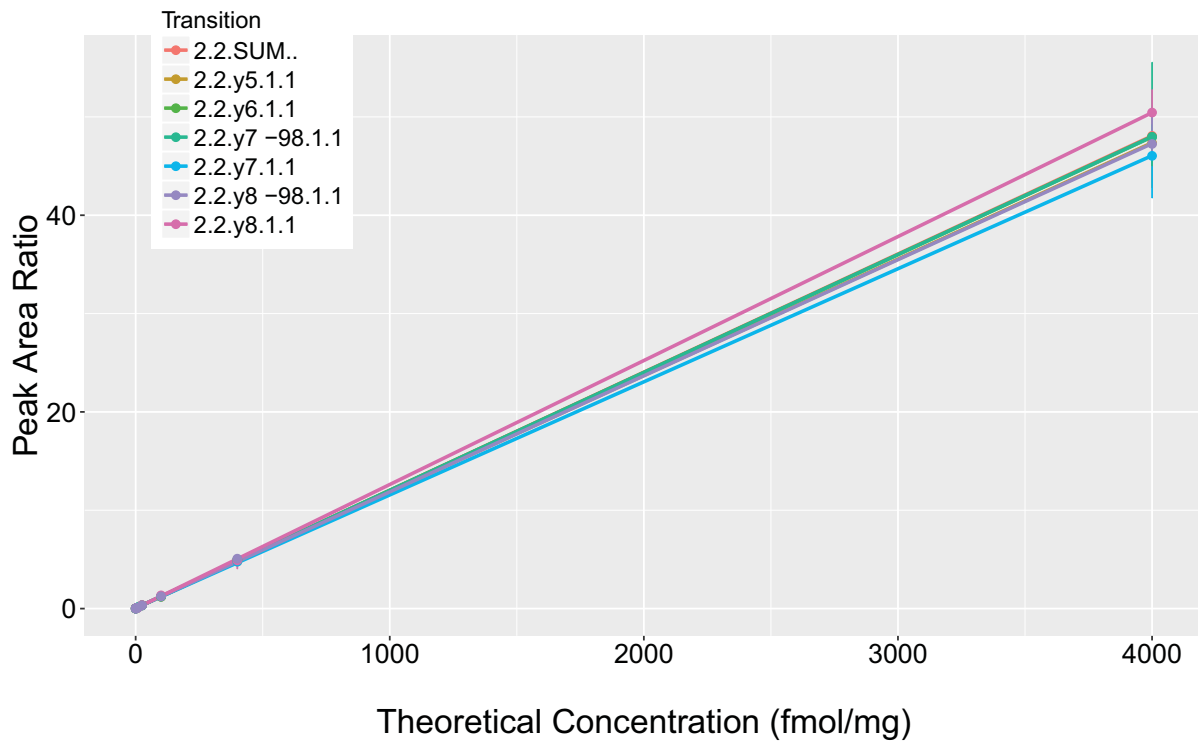

Analyte: sp|Q92547|TOPB1\_HUMAN.GVLTQTLEMR

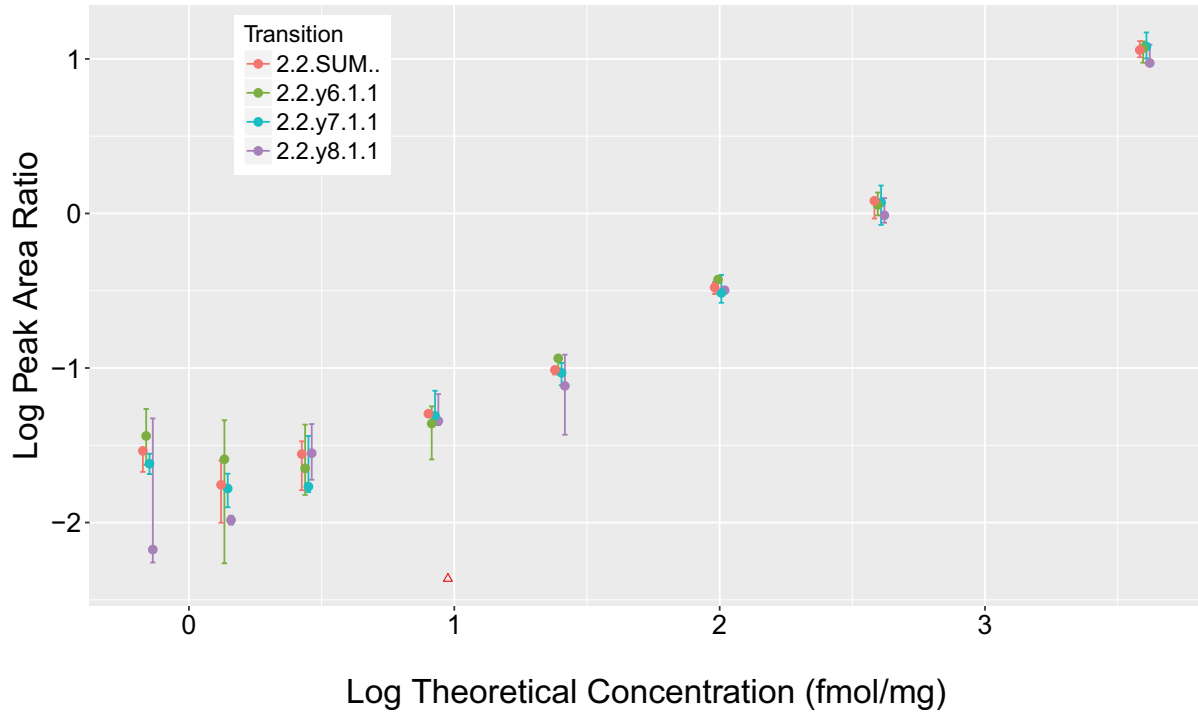

Analyte: sp|Q92547|TOPB1\_HUMAN.GVLTQTLEMR

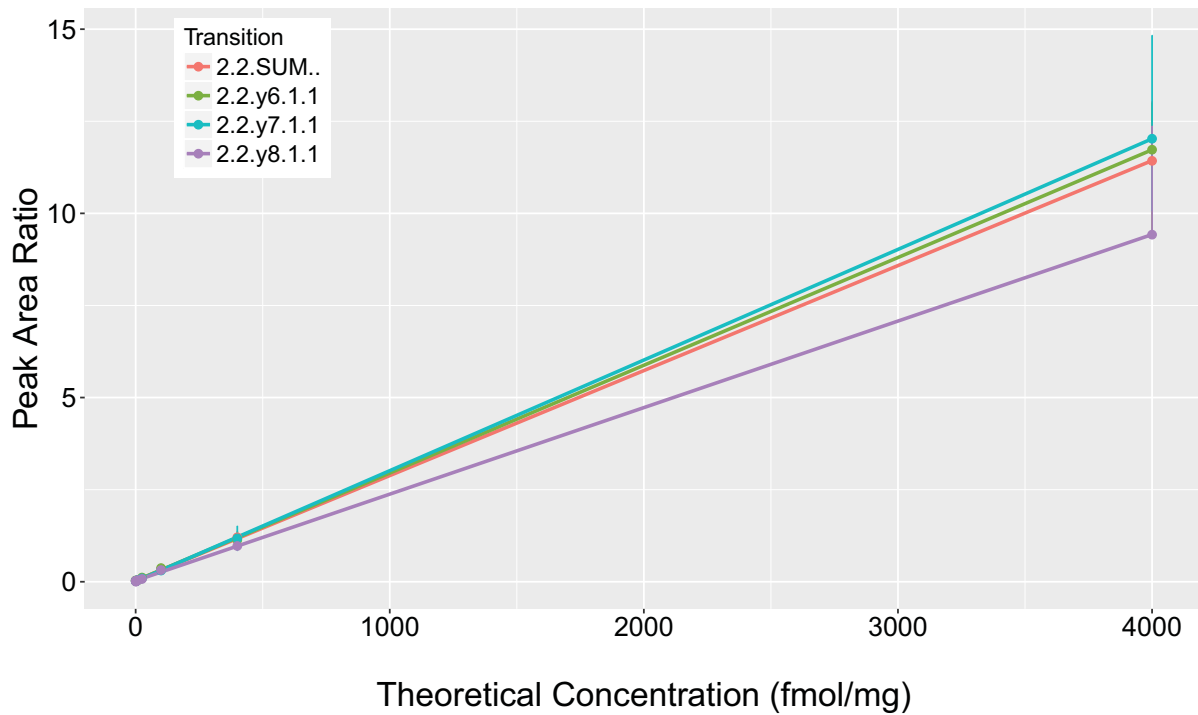



Analyte: sp|P54727|RD23B\_HUMAN.IDIDPEETVK

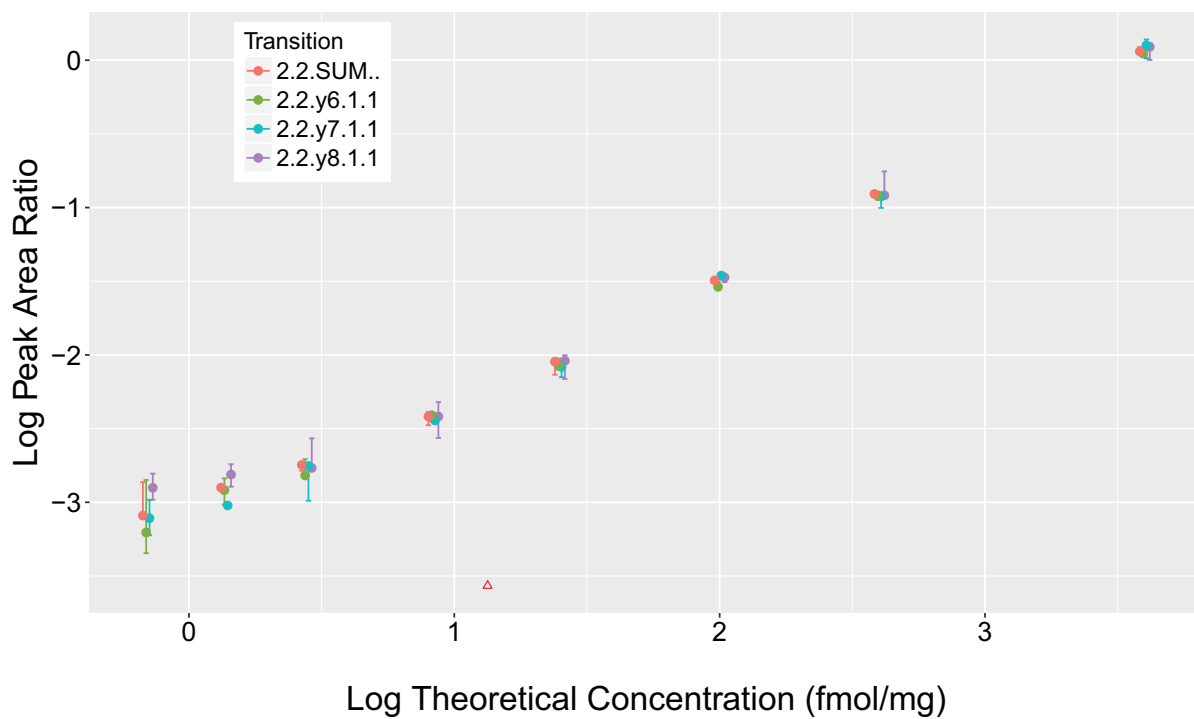

Analyte: sp|P54727|RD23B\_HUMAN.IDIDPEETVK

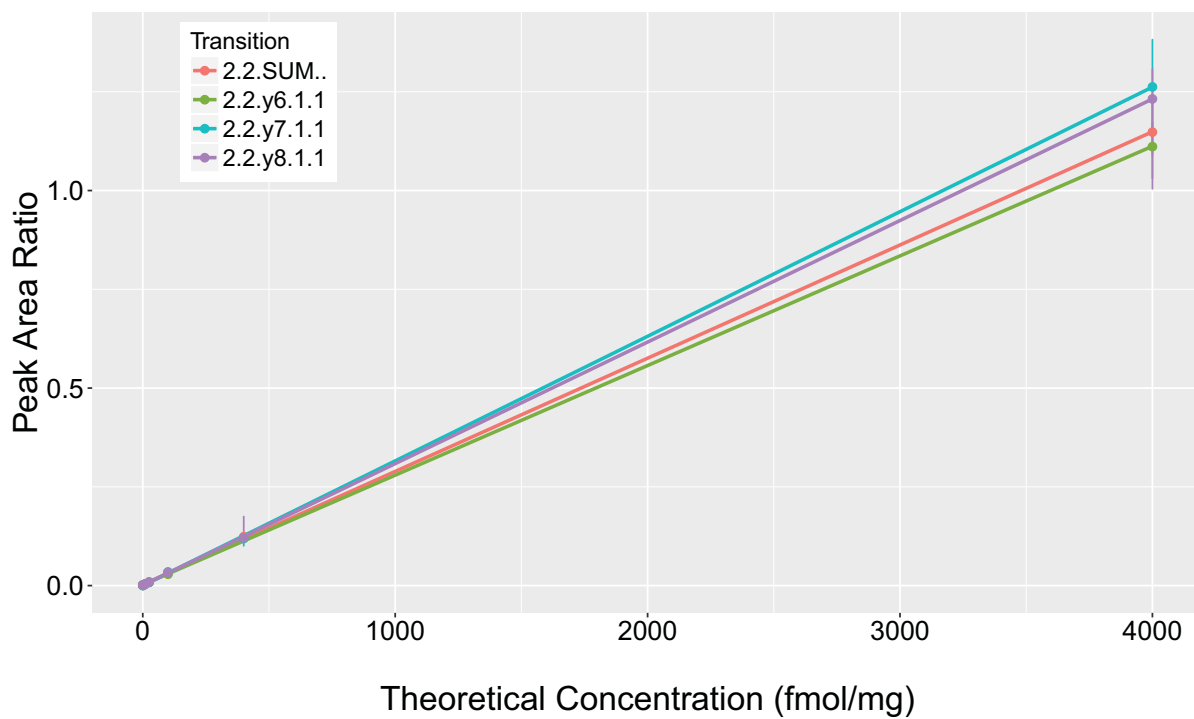

Analyte: sp|P31350|RIR2\_HUMAN.IEQEFLTEALPVK

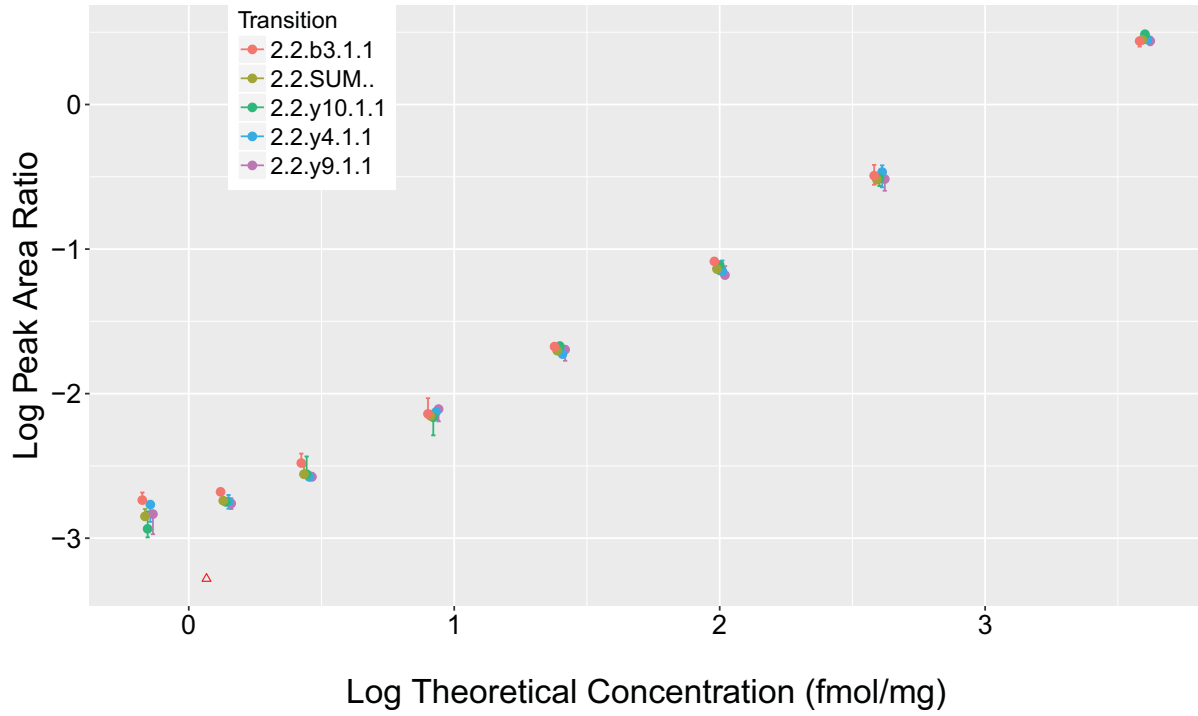

Analyte: sp|P31350|RIR2\_HUMAN.IEQEFLTEALPVK

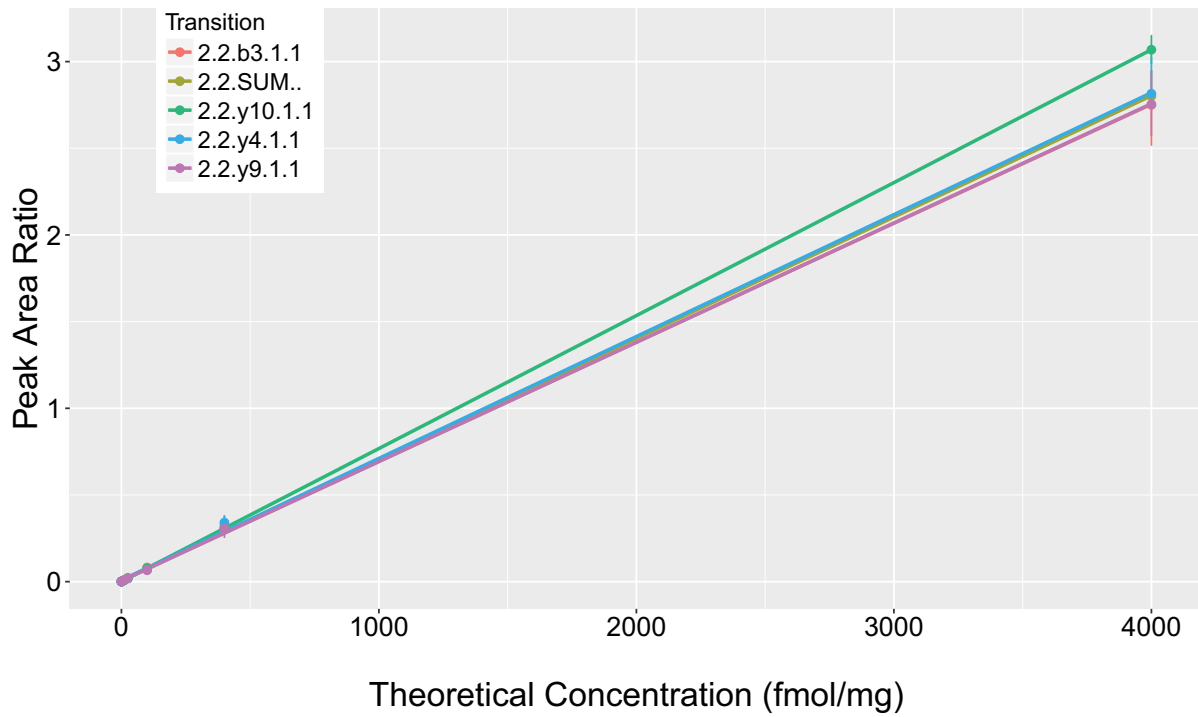

Analyte: sp|P54727|RD23B\_HUMAN.ILNDDTALK

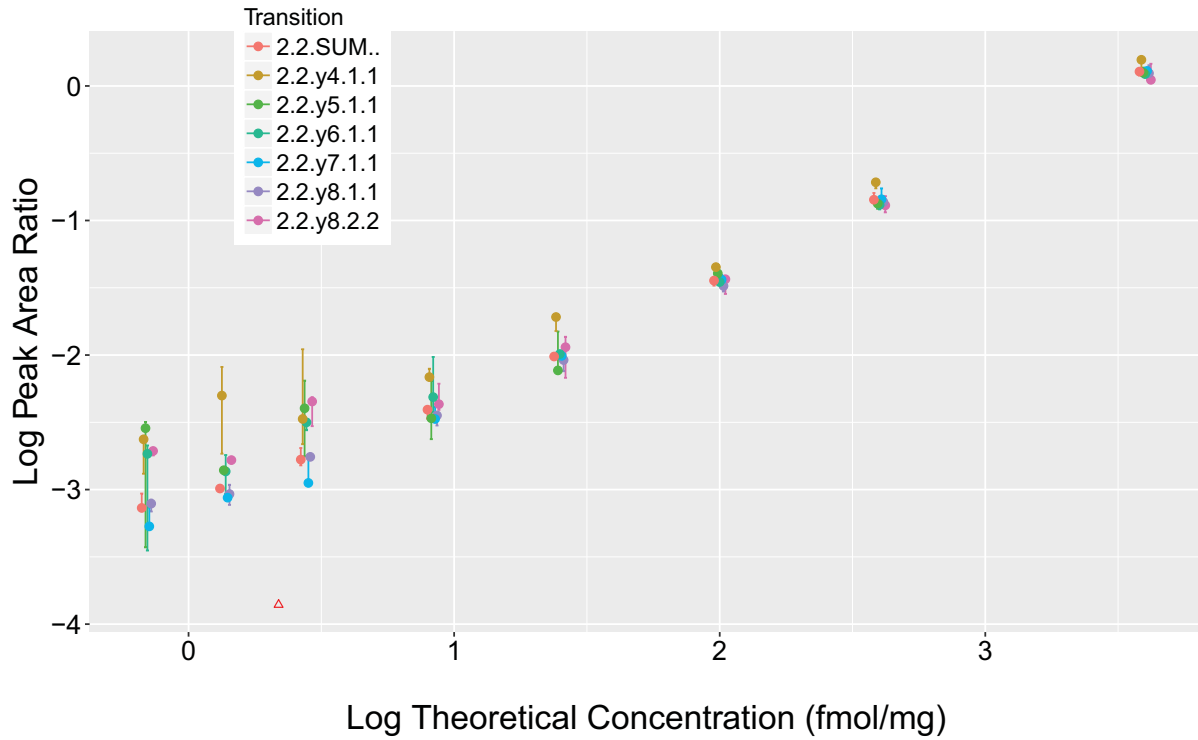

Analyte: sp|P54727|RD23B\_HUMAN.ILNDDTALK

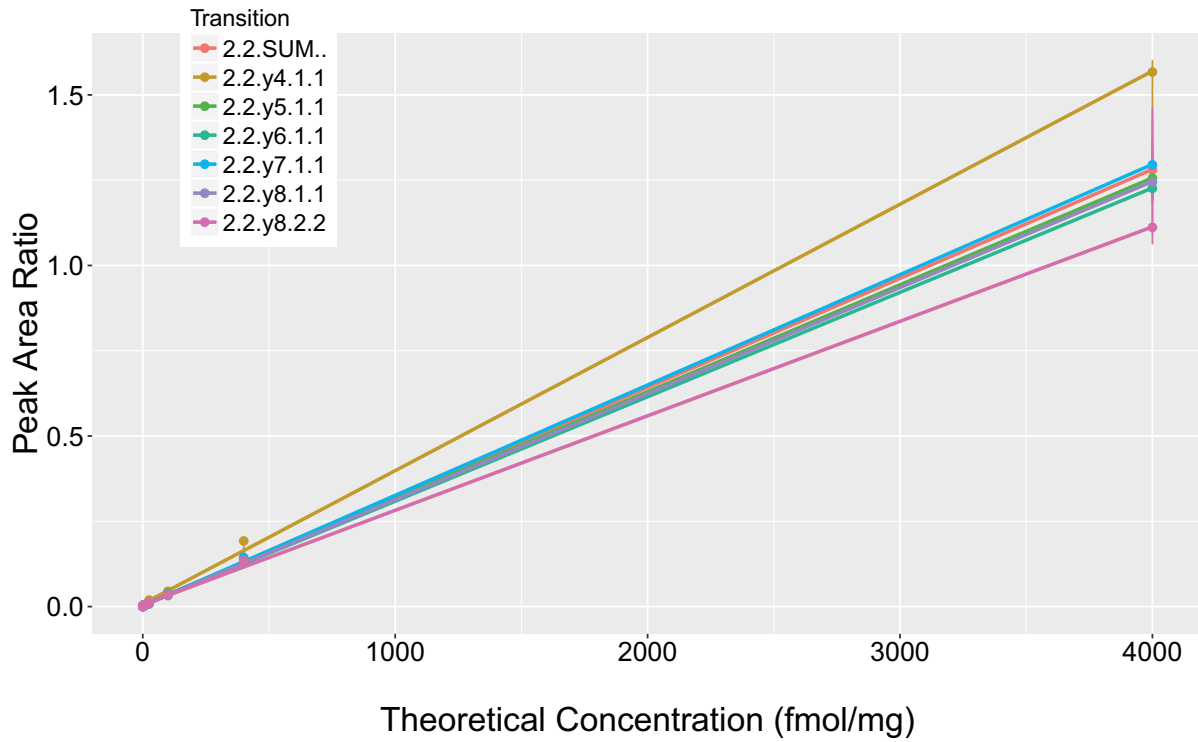

Analyte: sp|P06400|RB\_HUMAN.IPGGNIYIS[+80]PLK

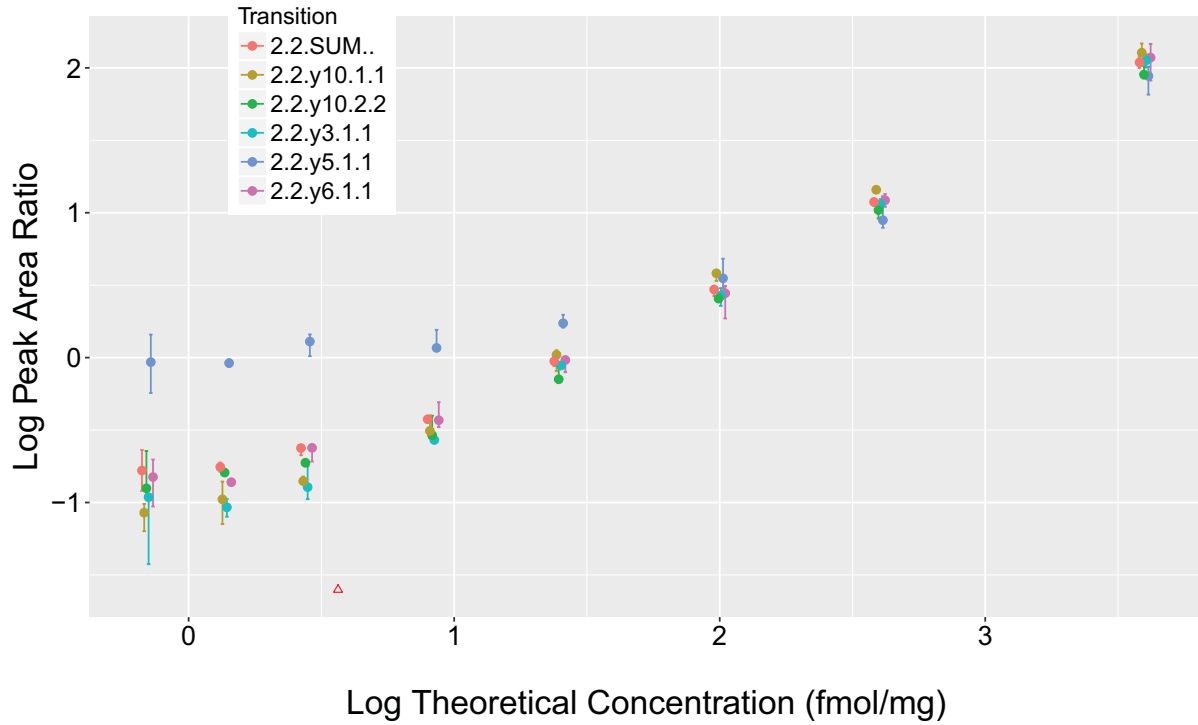

Analyte: sp|P06400|RB\_HUMAN.IPGGNIYIS[+80]PLK

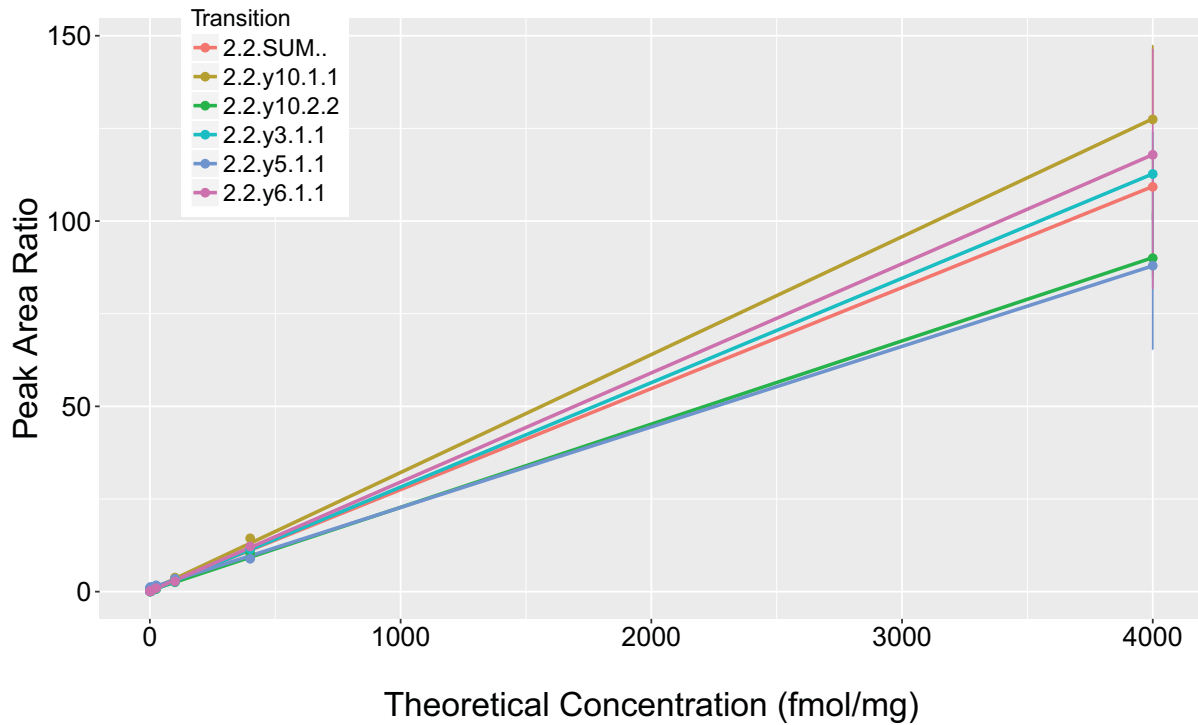

Analyte: sp|P06400|RB\_HUMAN.IPGGNIYISPLK

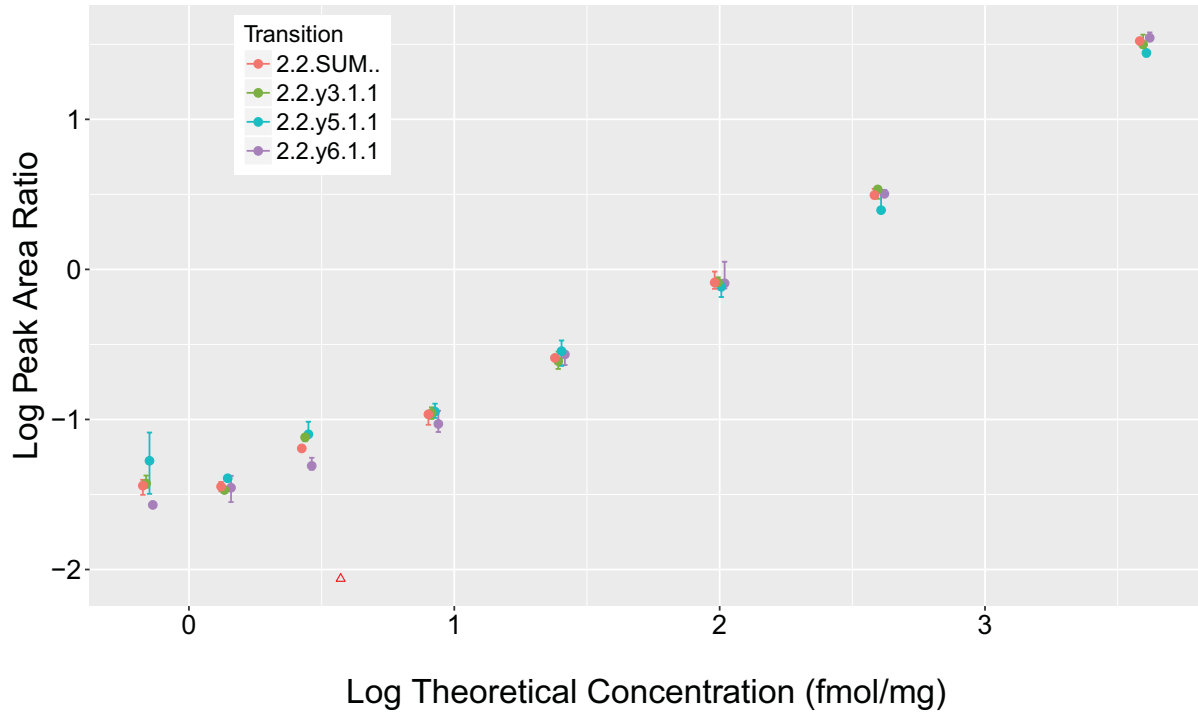

Analyte: sp|P06400|RB\_HUMAN.IPGGNIYISPLK

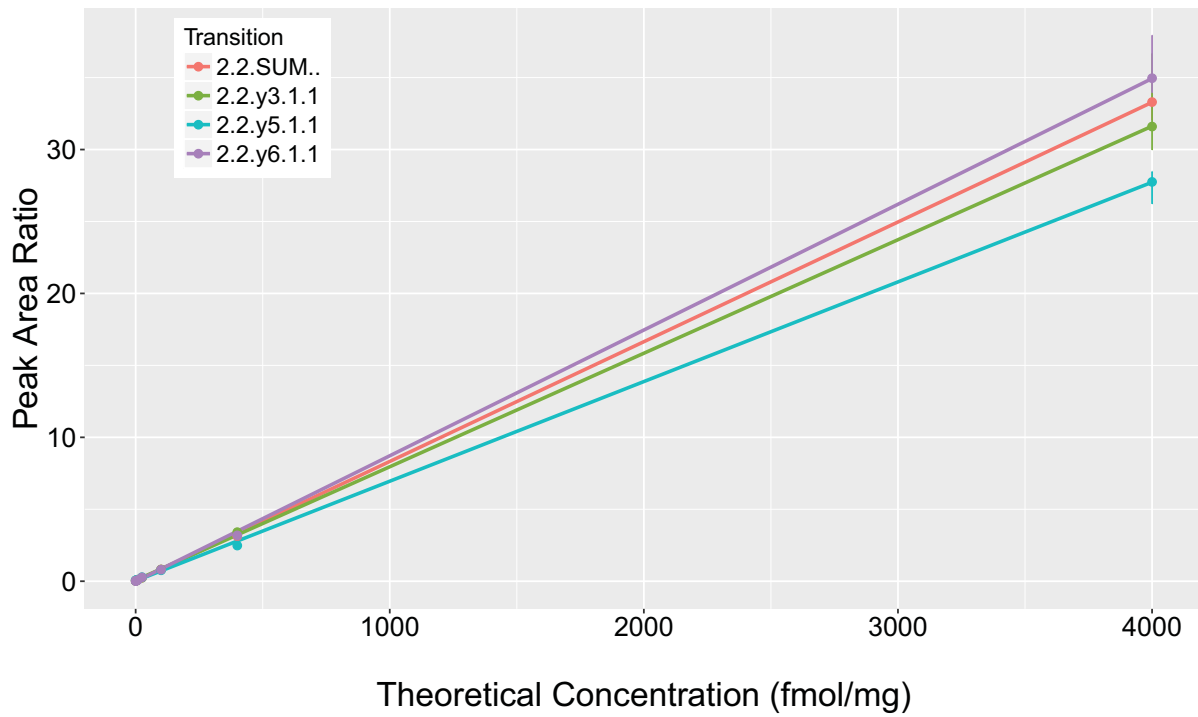

Analyte: sp|O60934|NBN\_HUMAN.IPNYQLS[+80]PTK

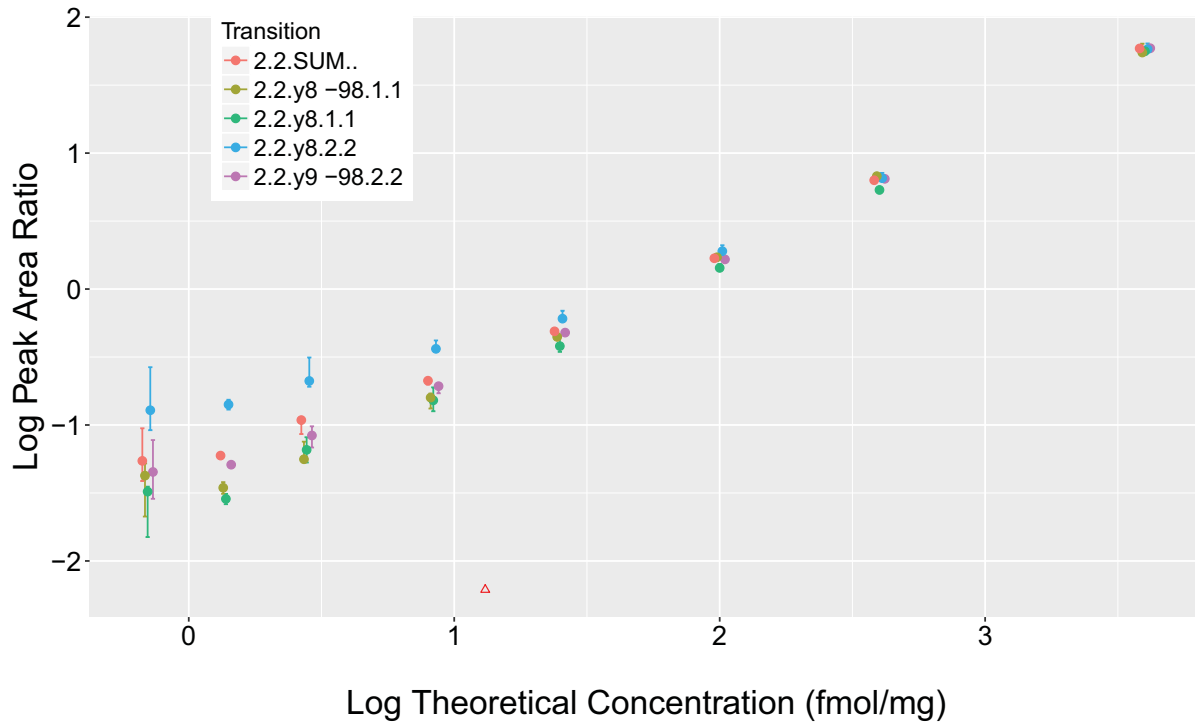

Analyte: sp|O60934|NBN\_HUMAN.IPNYQLS[+80]PTK

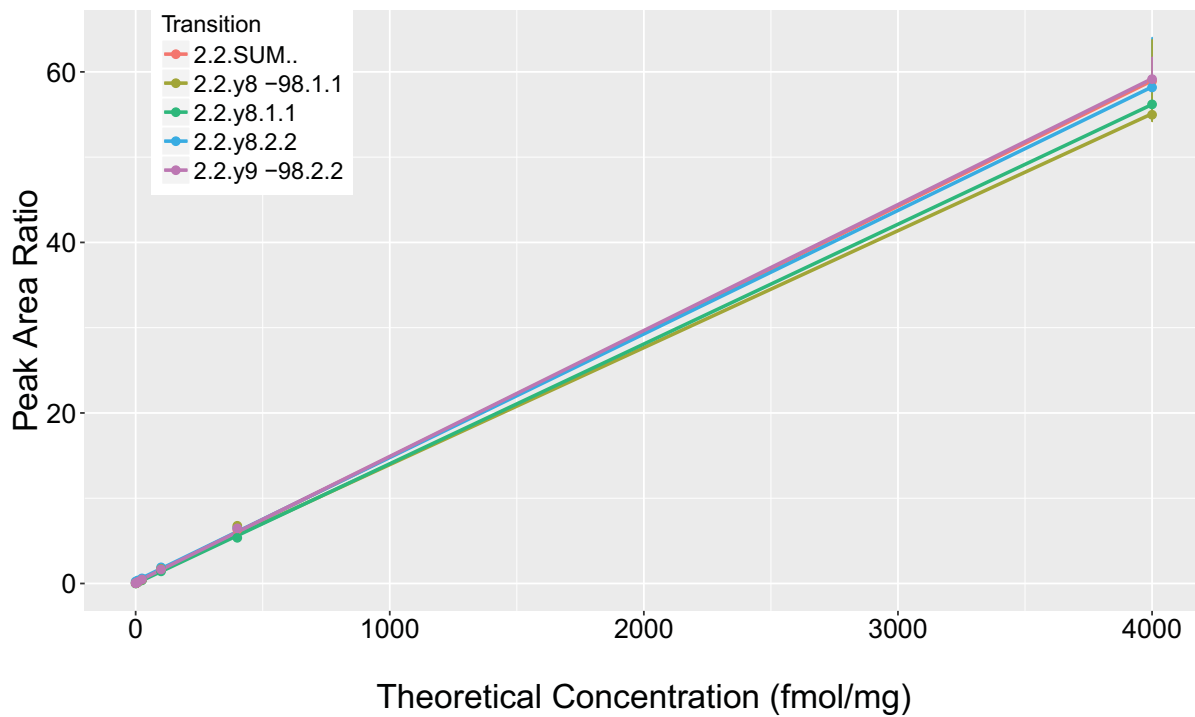

Analyte: sp|O60934|NBN\_HUMAN.IPNYQLSPTK

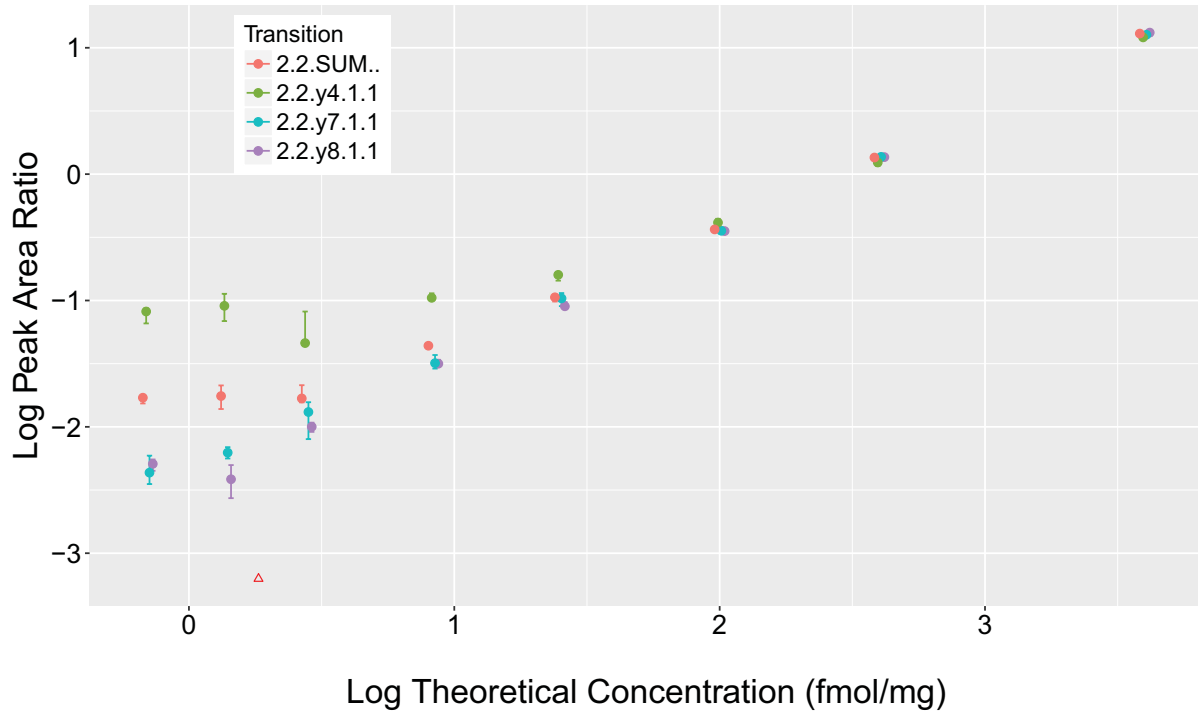

Analyte: sp|O60934|NBN\_HUMAN.IPNYQLSPTK

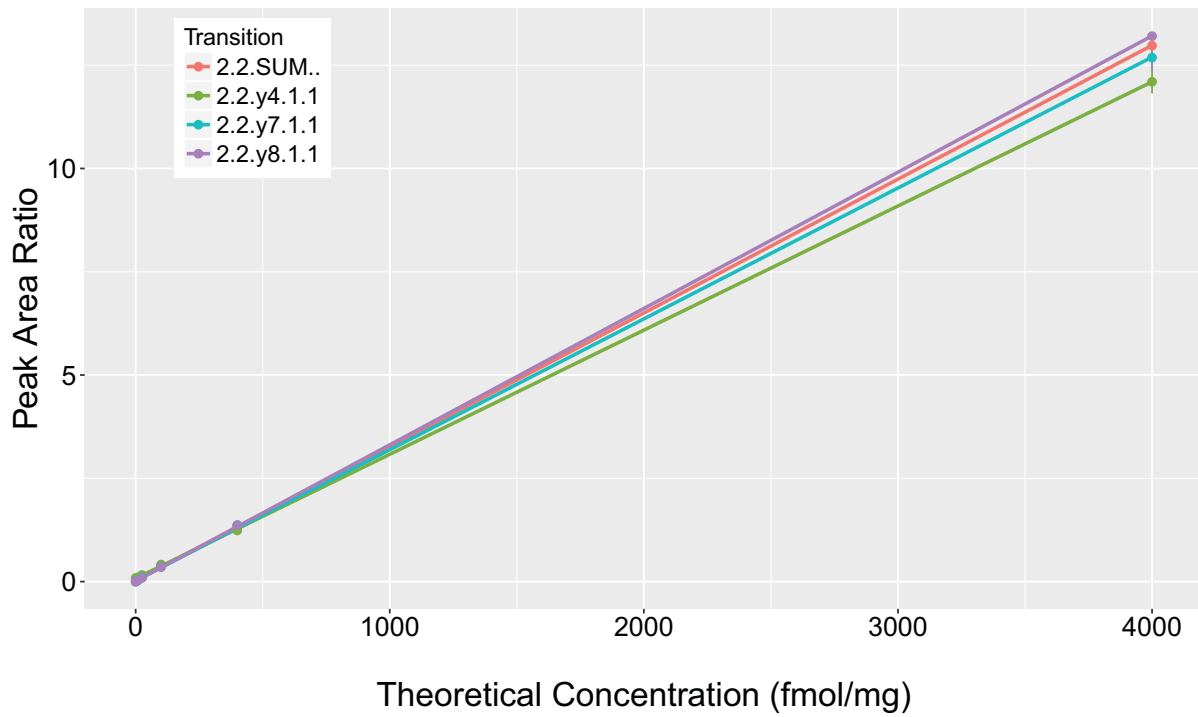

Analyte: sp|Q8WXE1|ATRIP\_HUMAN.LAAPSVSHVS[+80]PR

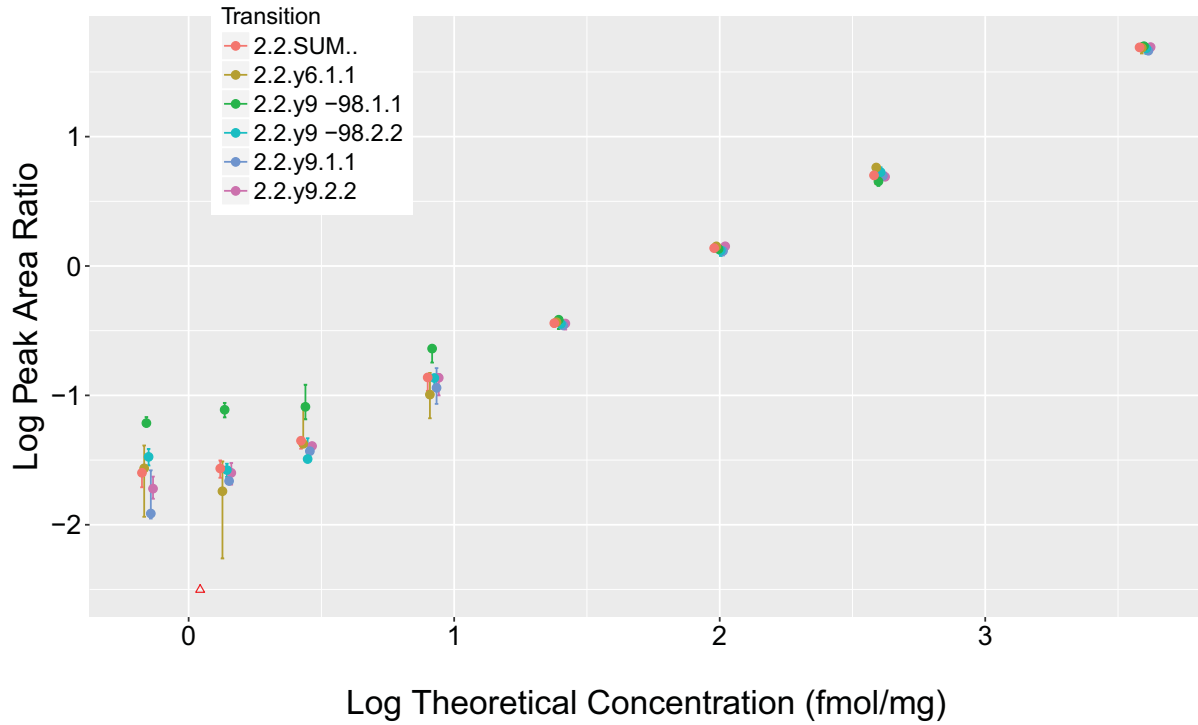

Analyte: sp|Q8WXE1|ATRIP\_HUMAN.LAAPSVSHVS[+80]PR

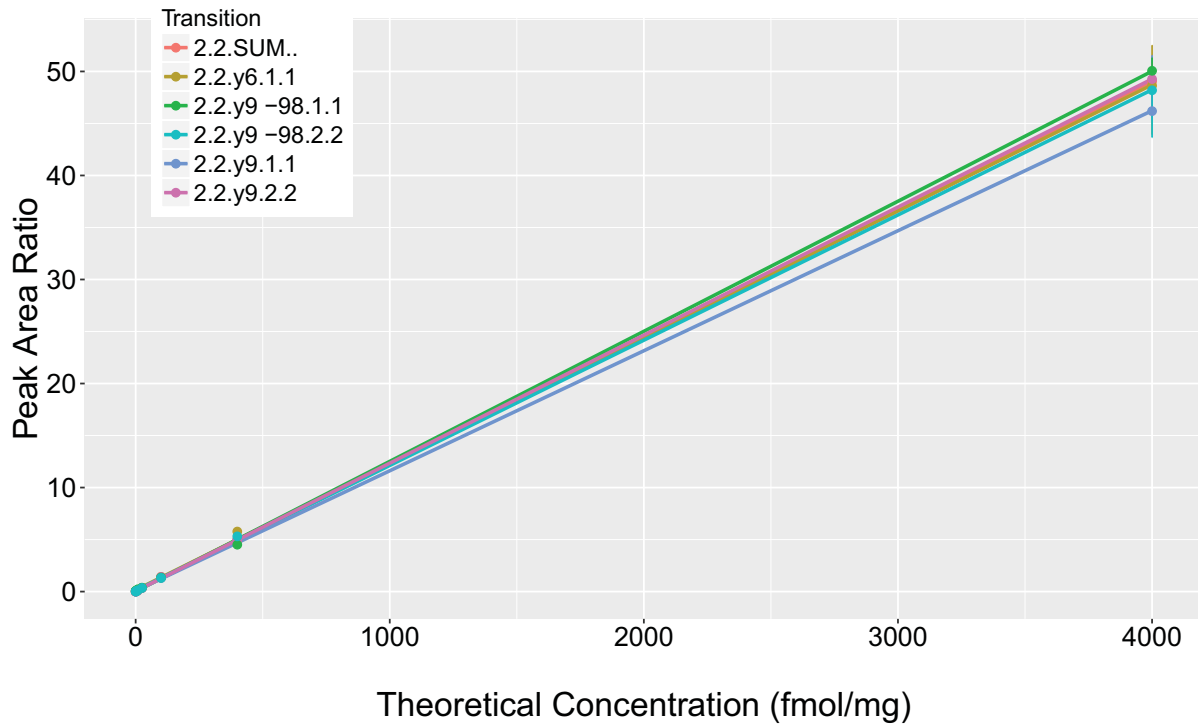



Analyte: sp|Q92878|RAD50\_HUMAN.LFDVC[+57]GSQDFESDLDR

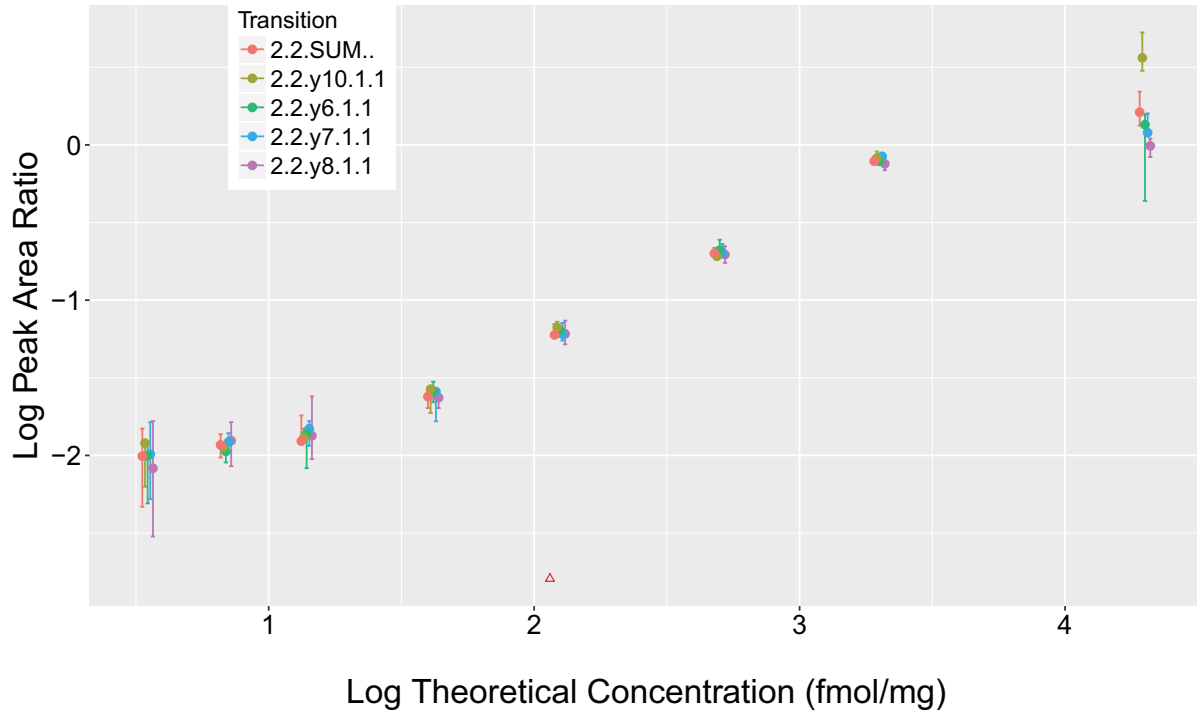

Analyte: sp|Q92878|RAD50\_HUMAN.LFDVC[+57]GSQDFESDLDR

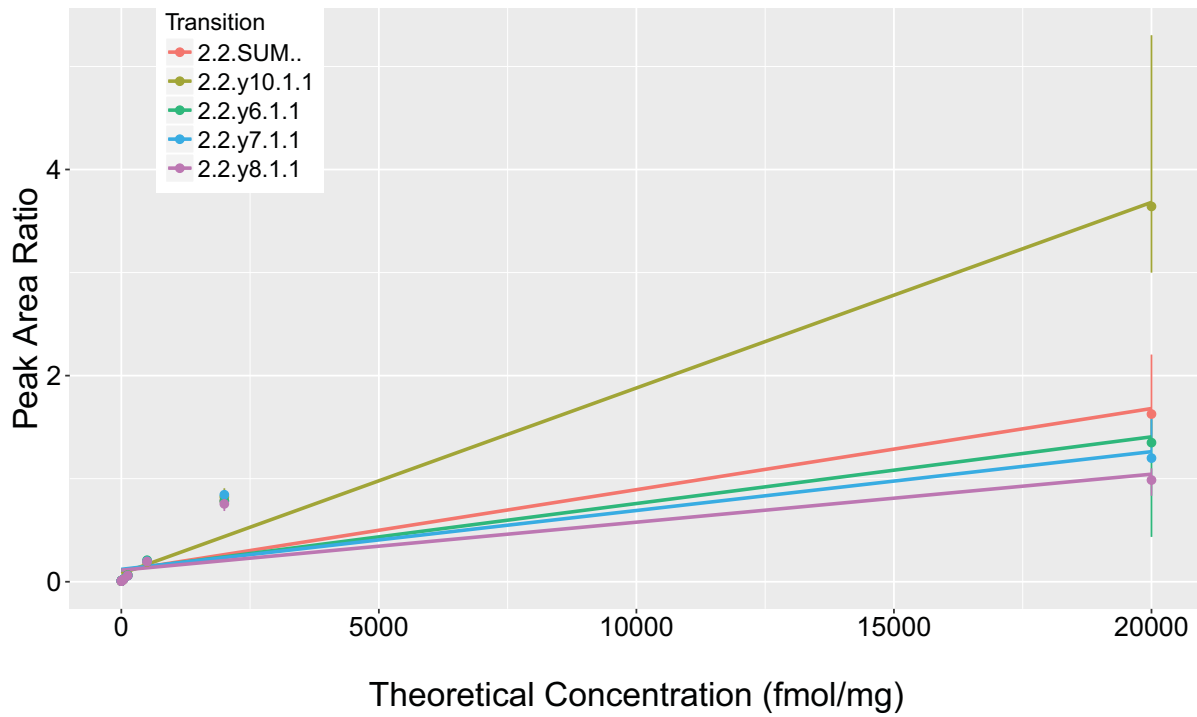

Analyte: sp|Q8WXE1|ATRIP\_HUMAN.LSDGDMTSALR

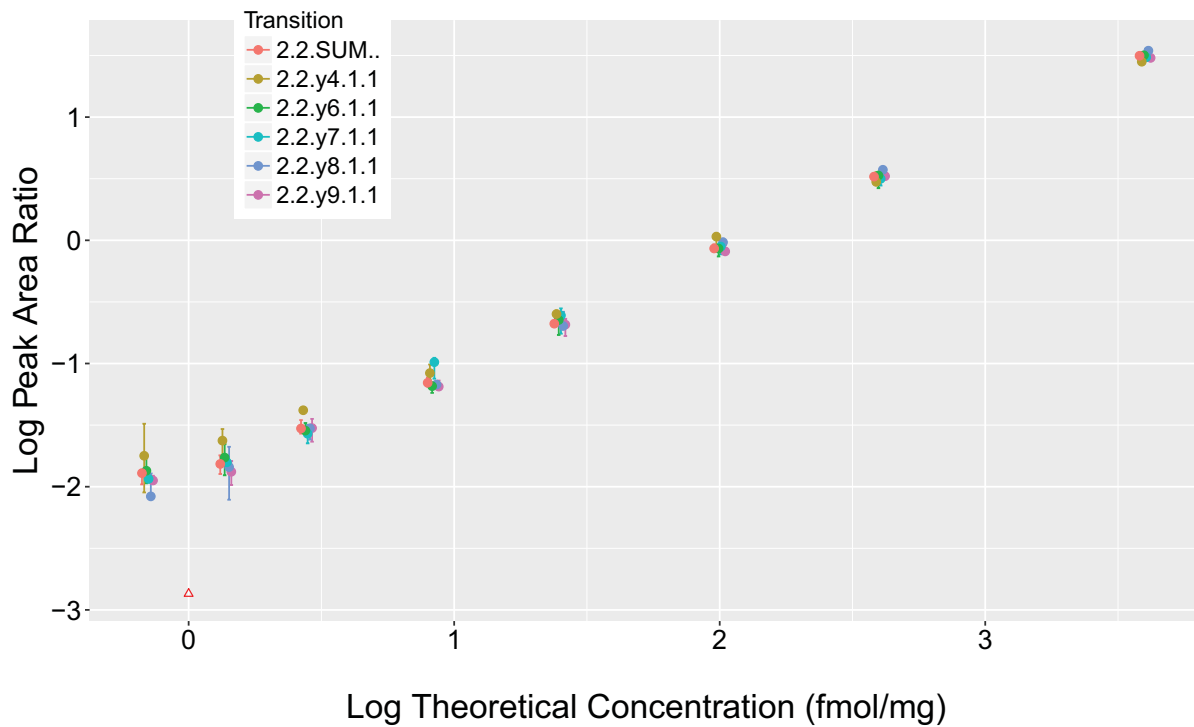

Analyte: sp|Q8WXE1|ATRIP\_HUMAN.LSDGDMTSALR

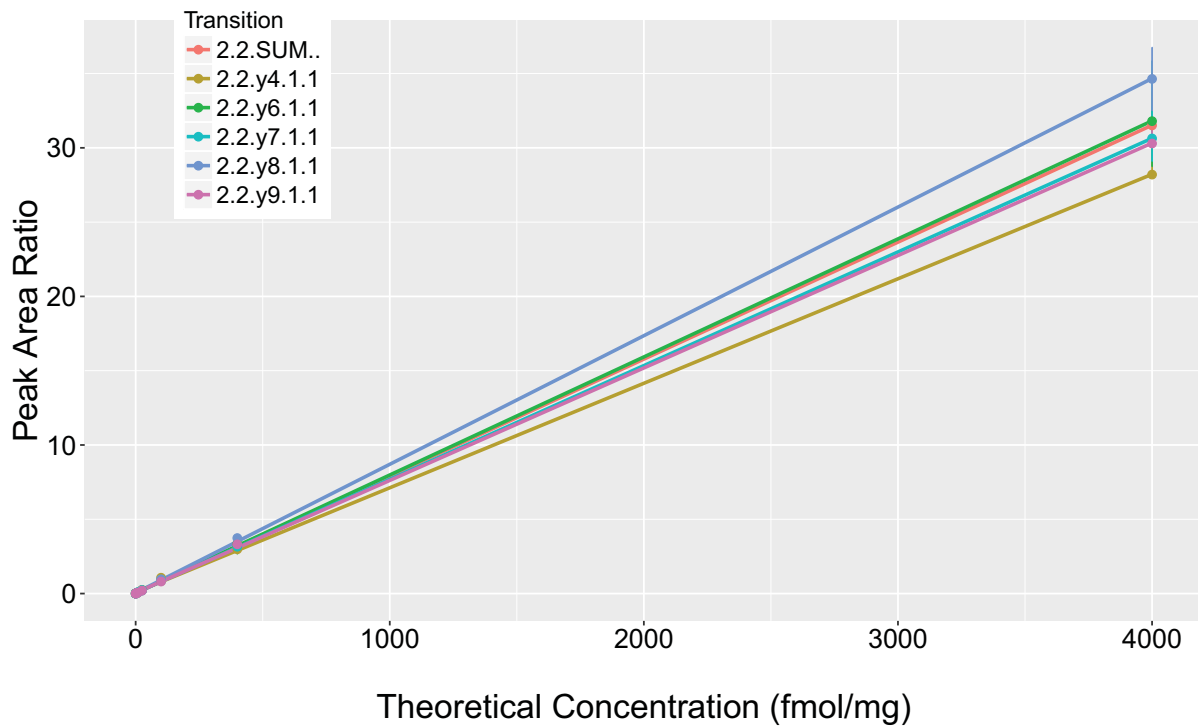

Analyte: sp|O00762|UBE2C\_HUMAN.LSLEFPSGYPNAPTVM

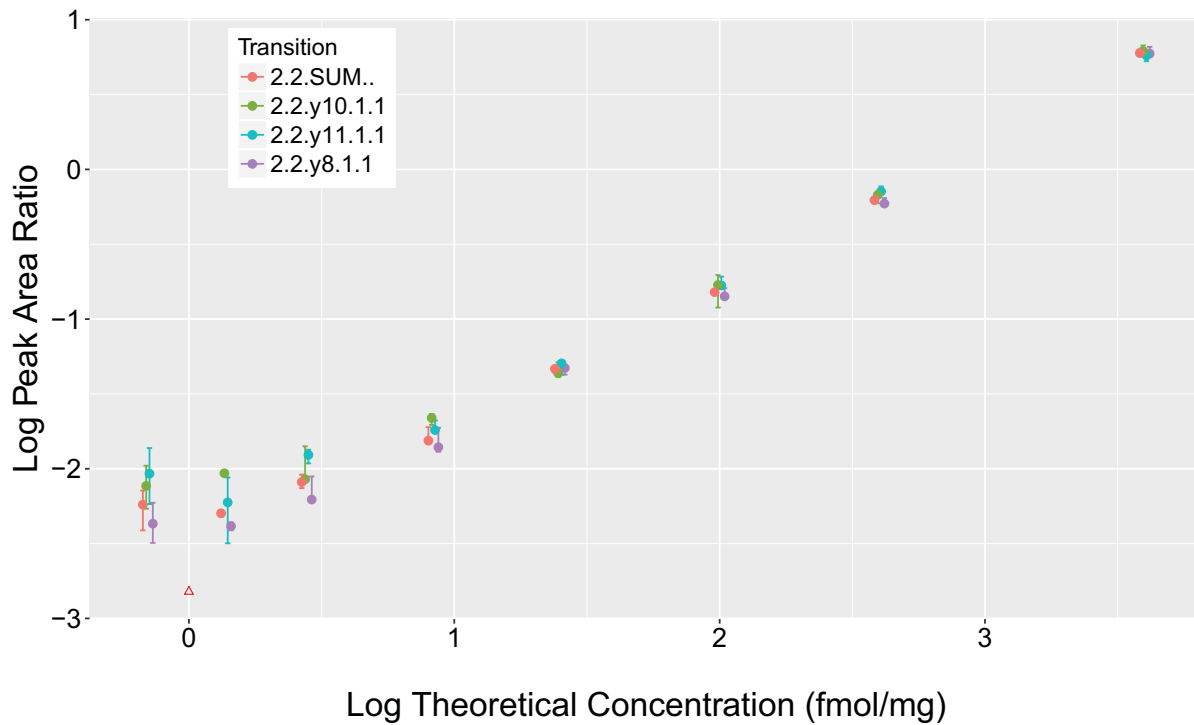

Analyte: sp|O00762|UBE2C\_HUMAN.LSLEFPSGYPNAPTVM

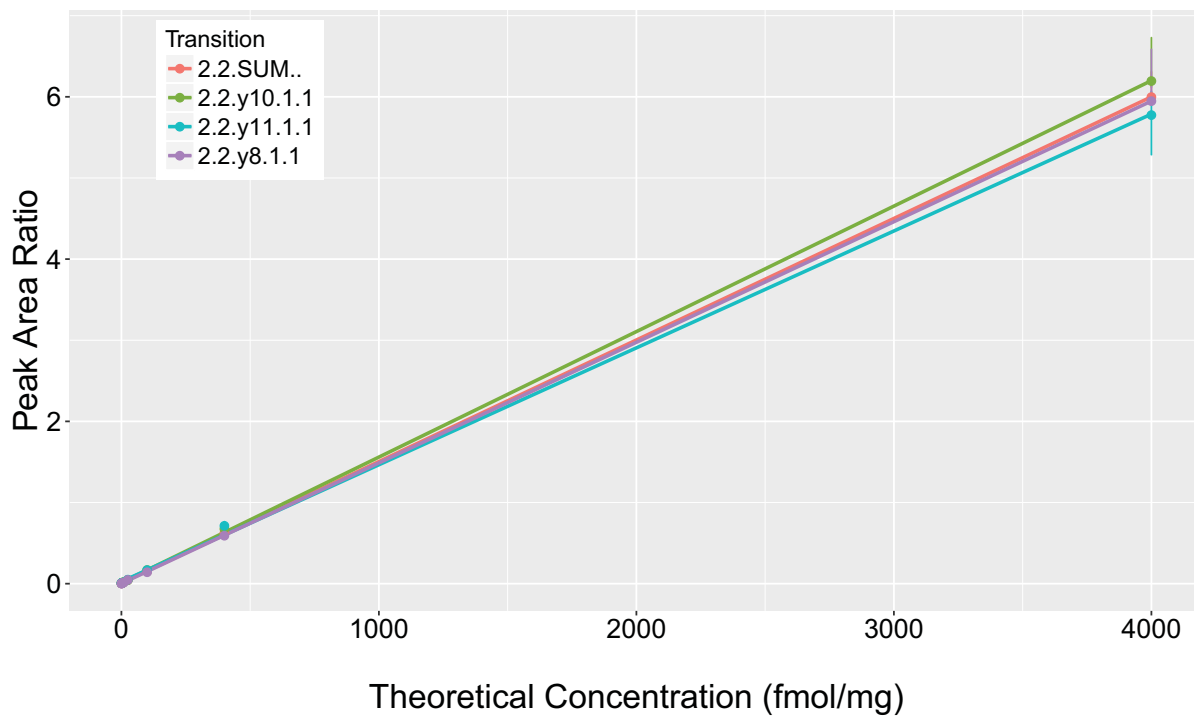

Analyte: sp|P12004|PCNA\_HUMAN.LVQGSILK

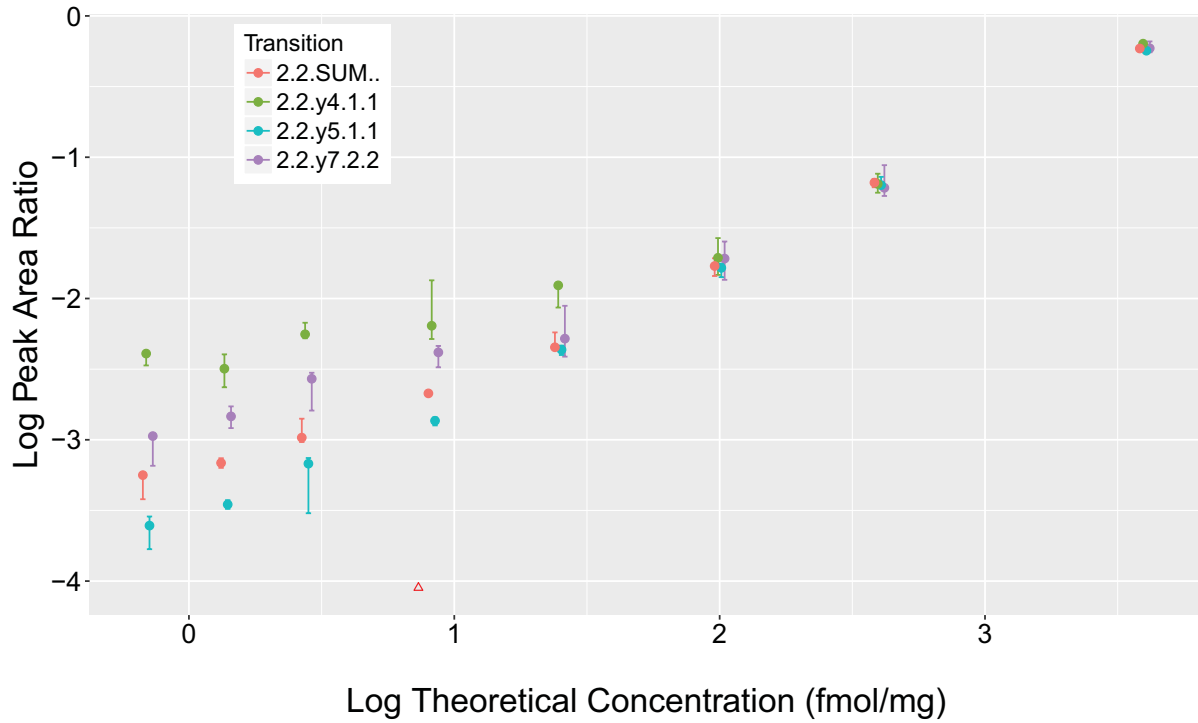

Analyte: sp|P12004|PCNA\_HUMAN.LVQGSILK

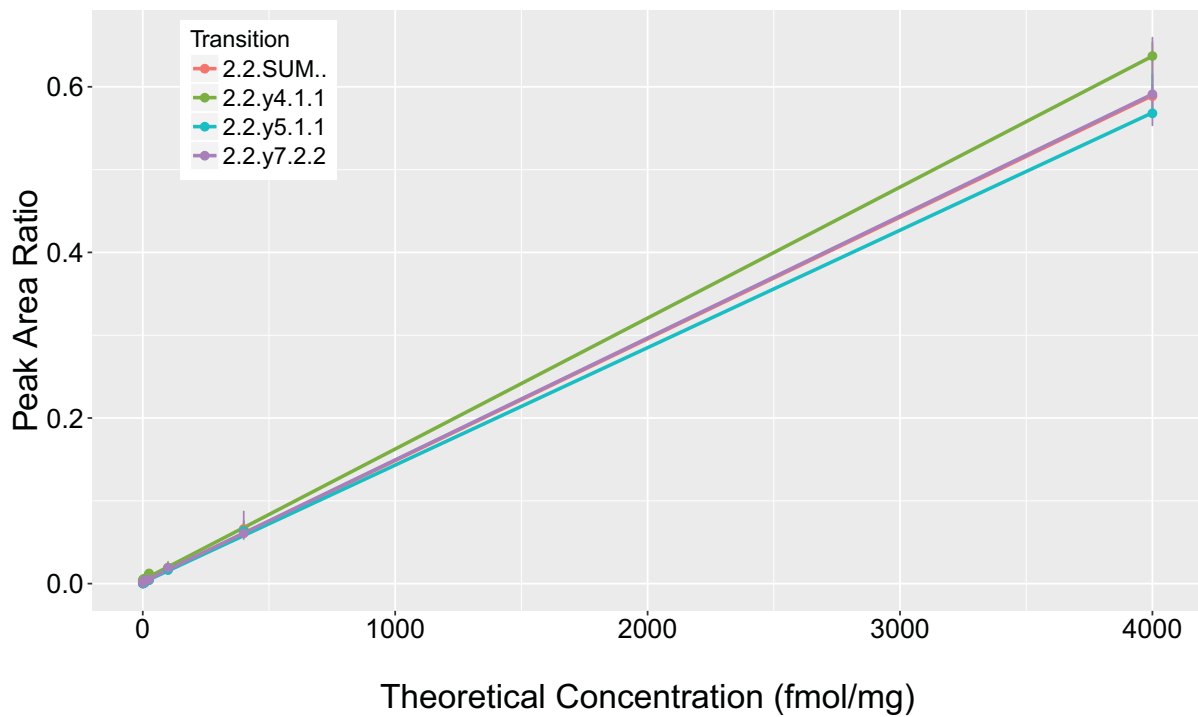

Analyte: sp|Q9NS91|RAD18\_HUMAN.NDLQDTEIS[+80]PR

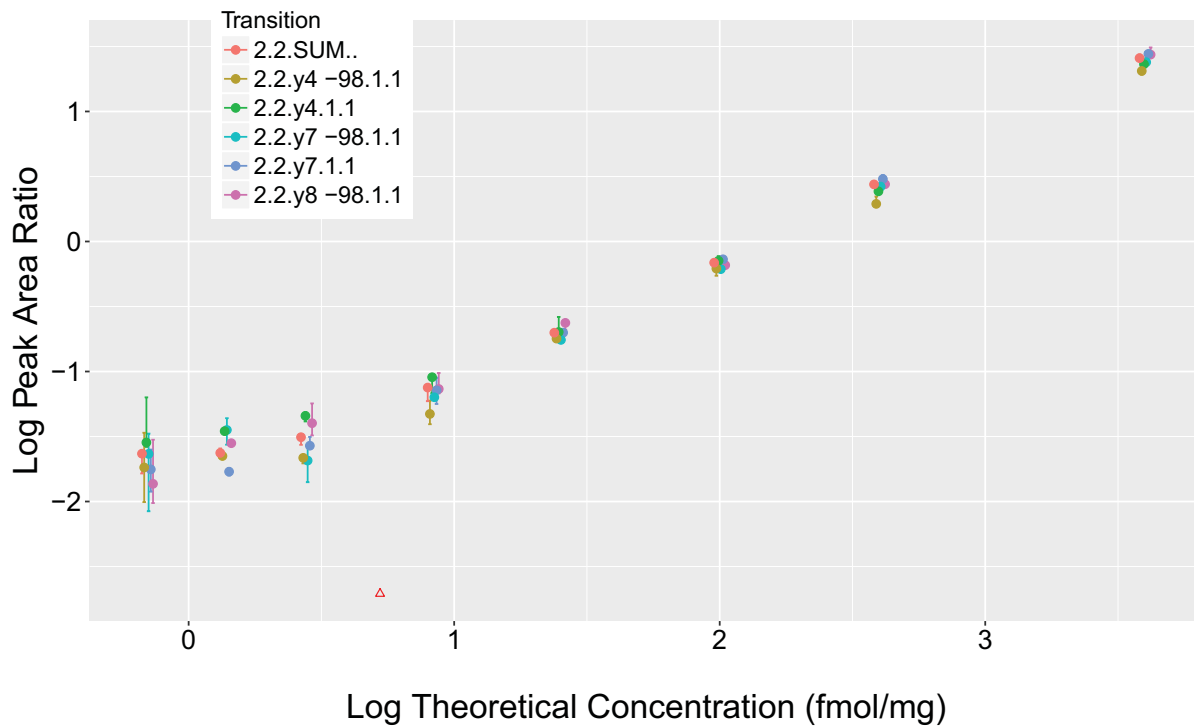

Analyte: sp|Q9NS91|RAD18\_HUMAN.NDLQDTEIS[+80]PR

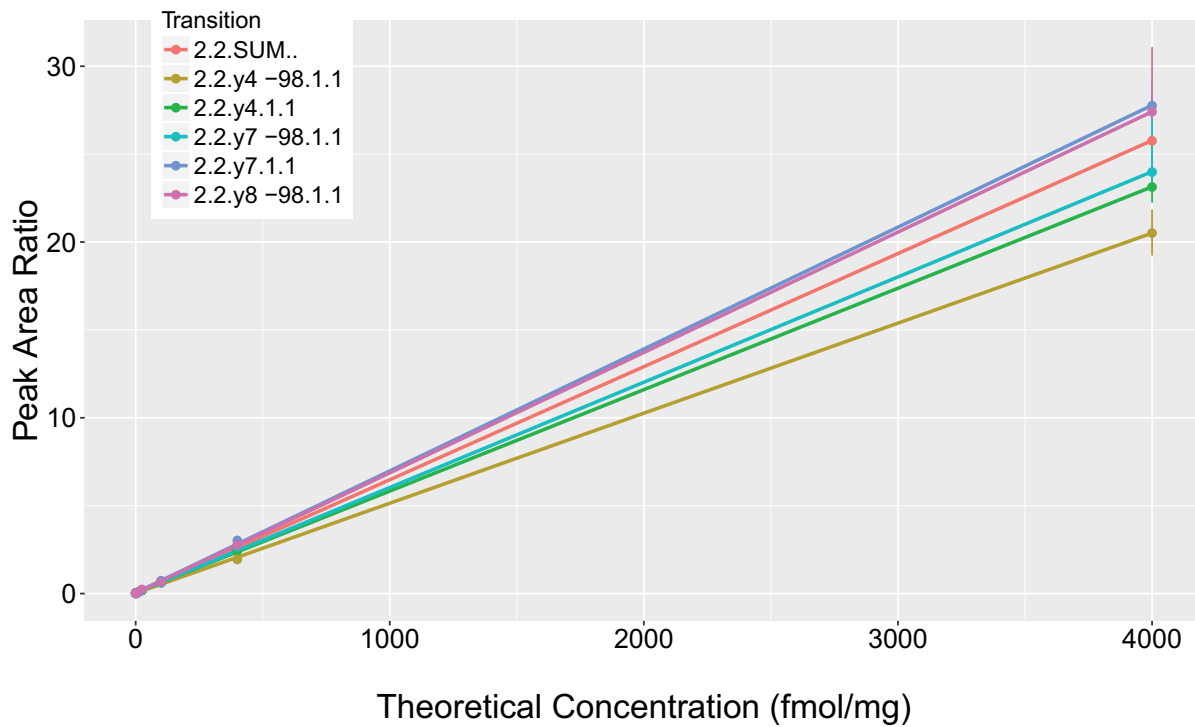

Analyte: sp|Q86YC2|PALB2\_HUMAN.NENLQESEILS[+80]QPK

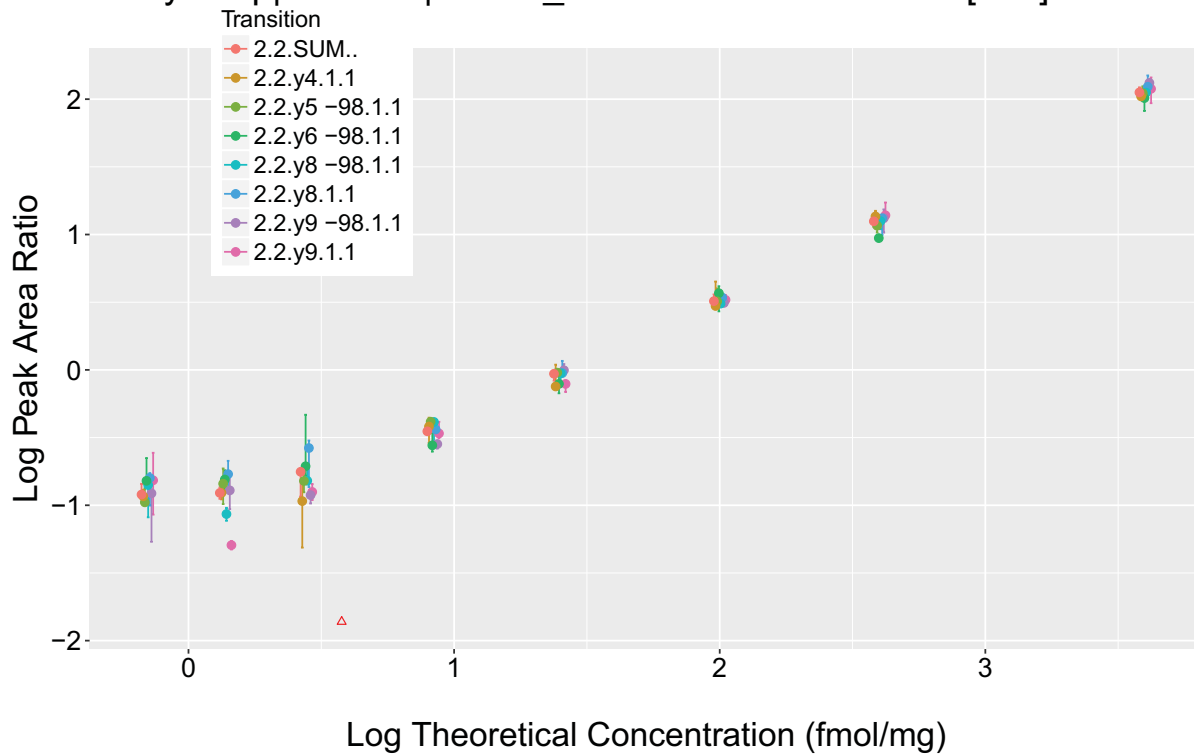

Analyte: sp|Q86YC2|PALB2\_HUMAN.NENLQESEILS[+80]QPK

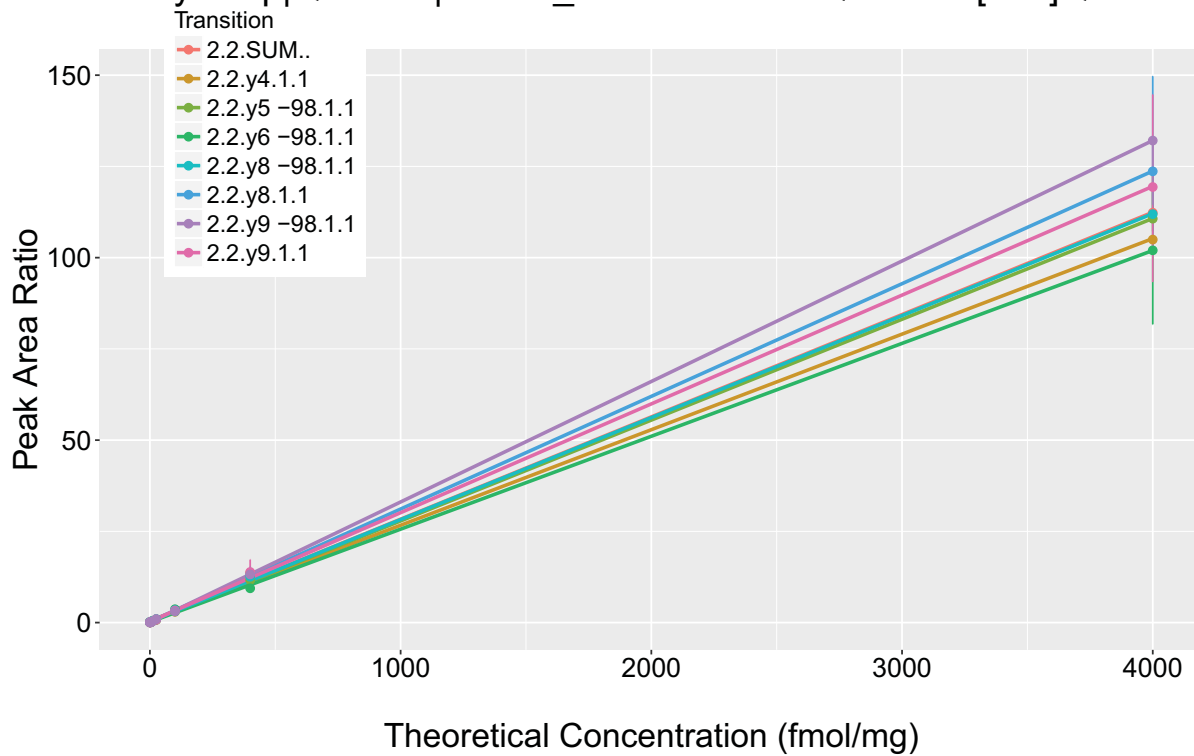

Analyte: sp|Q9NS91|RAD18\_HUMAN.NHLLQFALES[+80]PAK

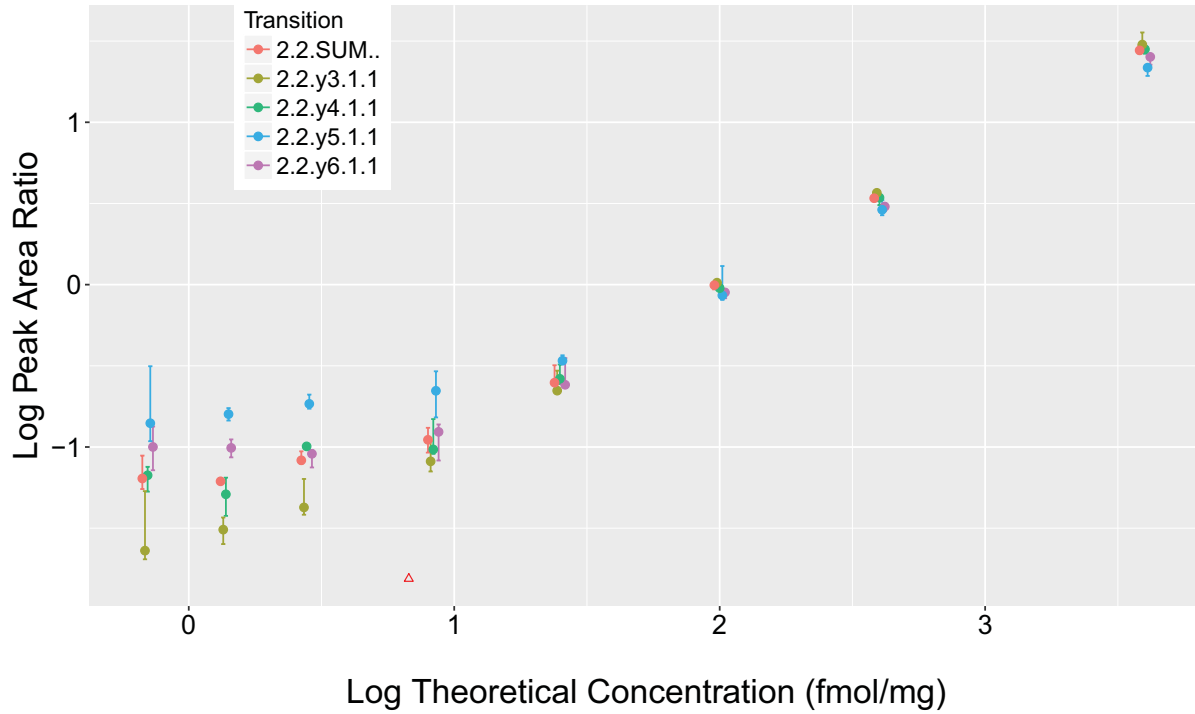

Analyte: sp|Q9NS91|RAD18\_HUMAN.NHLLQFALES[+80]PAK

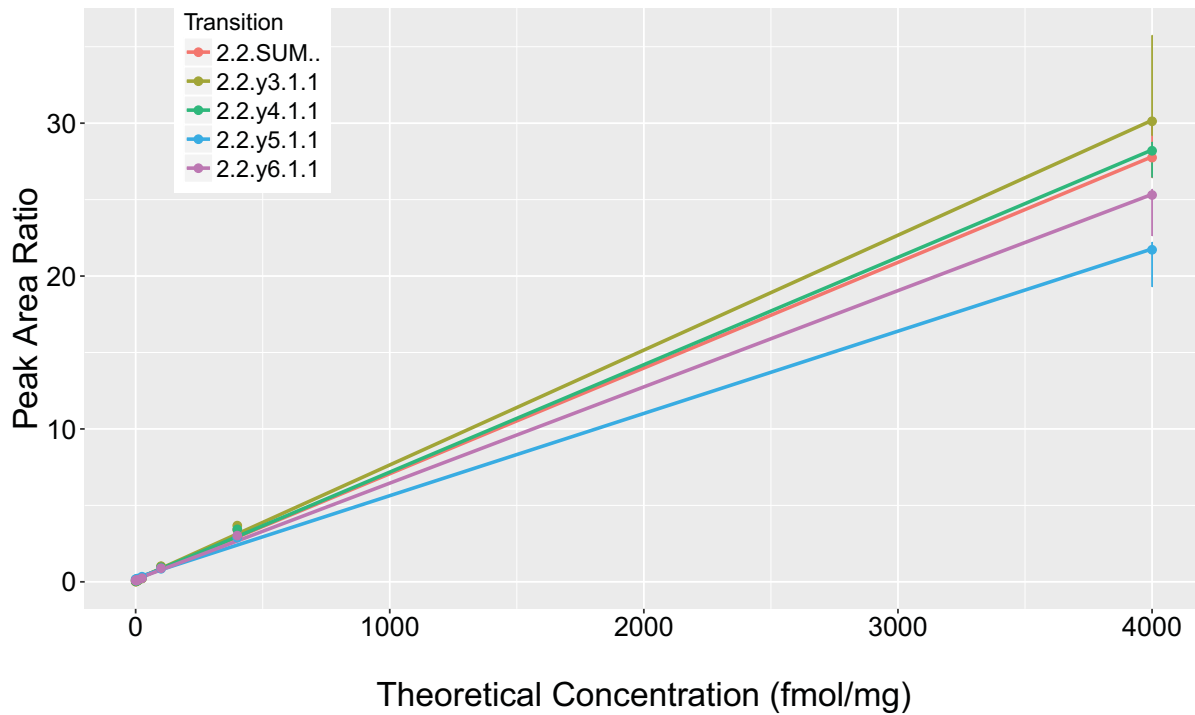

Analyte: sp|Q9NS91|RAD18\_HUMAN.NHLLQFALESPAK

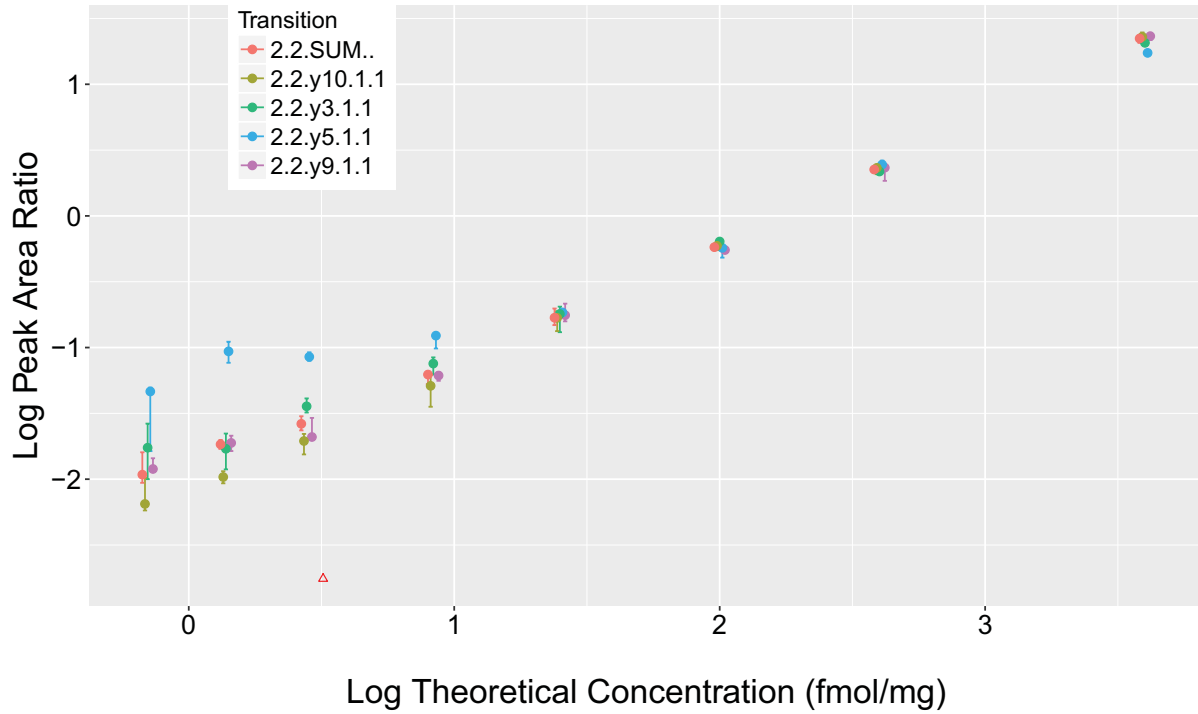

Analyte: sp|Q9NS91|RAD18\_HUMAN.NHLLQFALESPAK

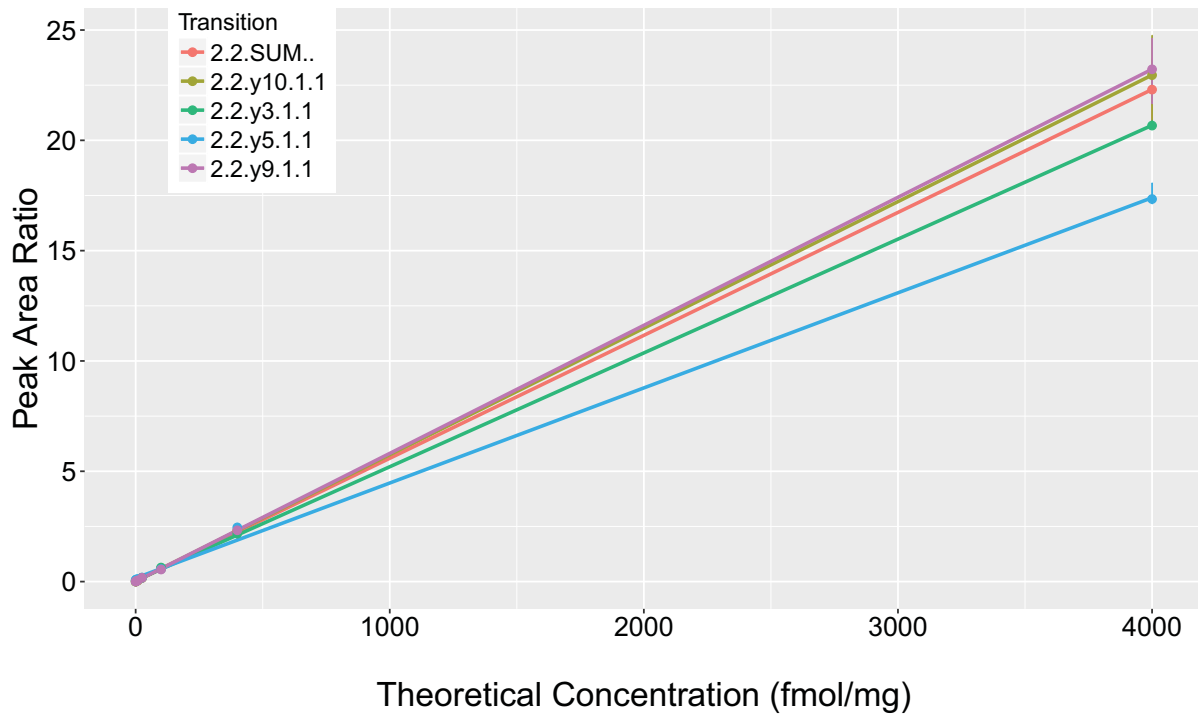



Analyte: sp|Q13315|ATM\_HUMAN.NLS[+80]DIDQSFNK

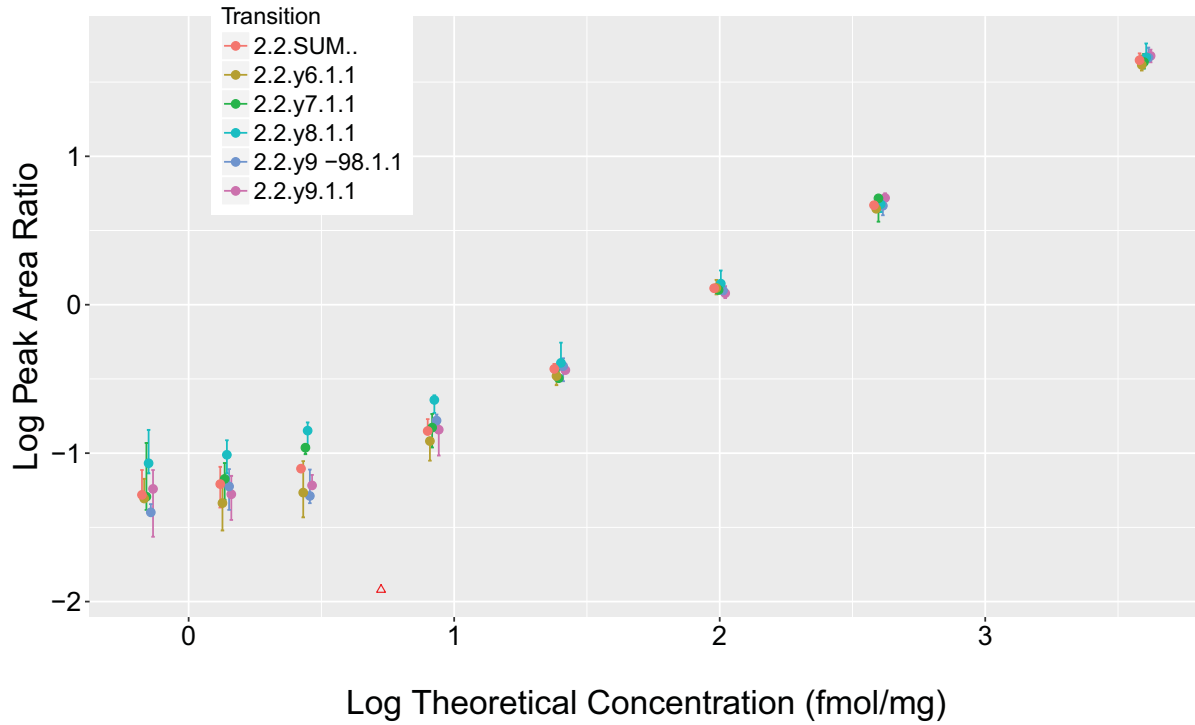

Analyte: sp|Q13315|ATM\_HUMAN.NLS[+80]DIDQSFNK

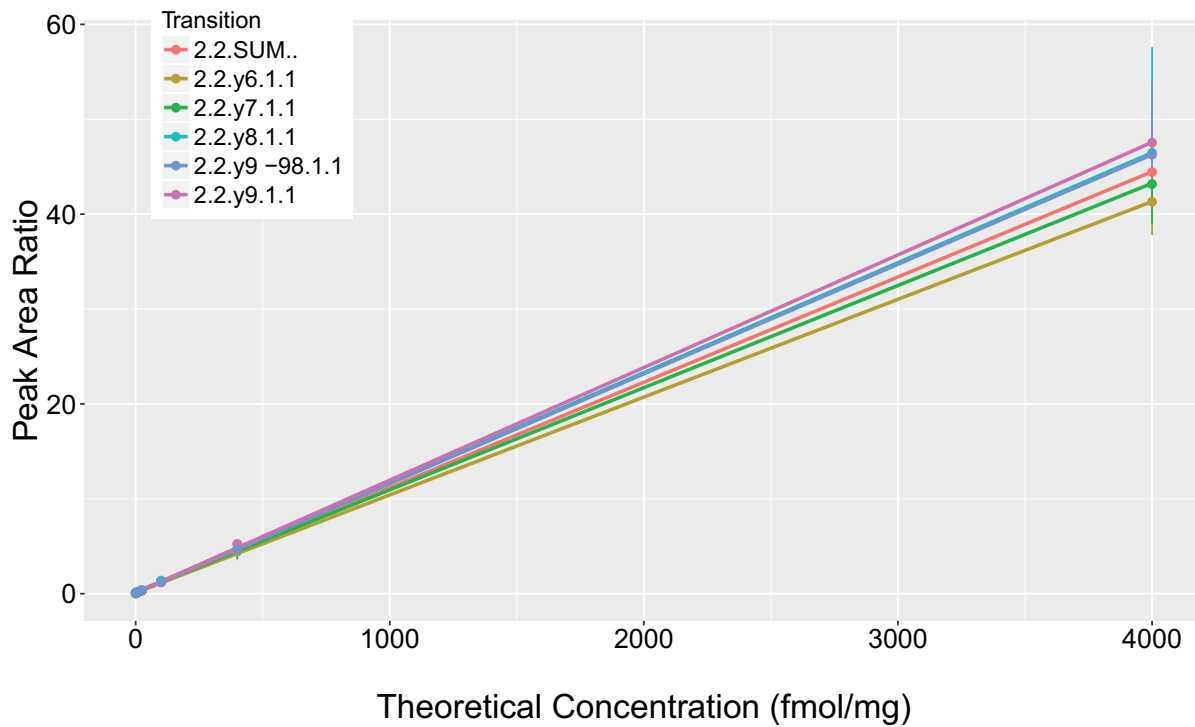

Analyte: sp|Q13315|ATM\_HUMAN.NLSDIDQSFNK

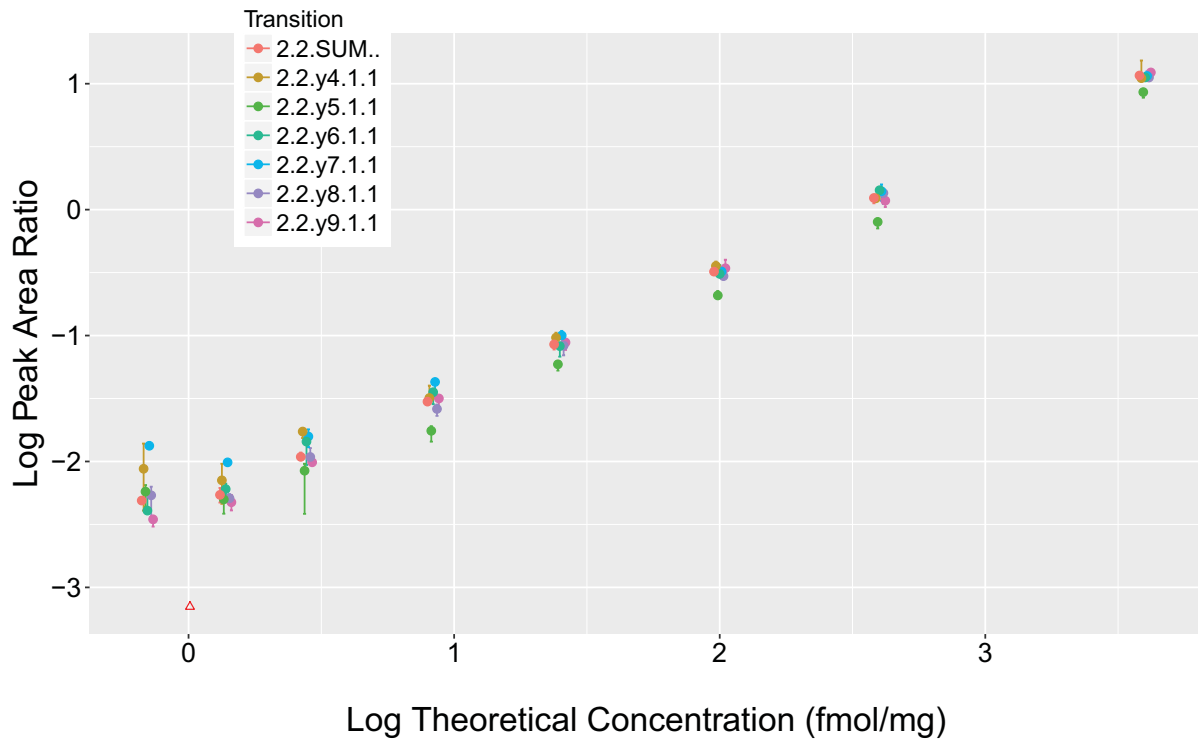

Analyte: sp|Q13315|ATM\_HUMAN.NLSDIDQSFNK

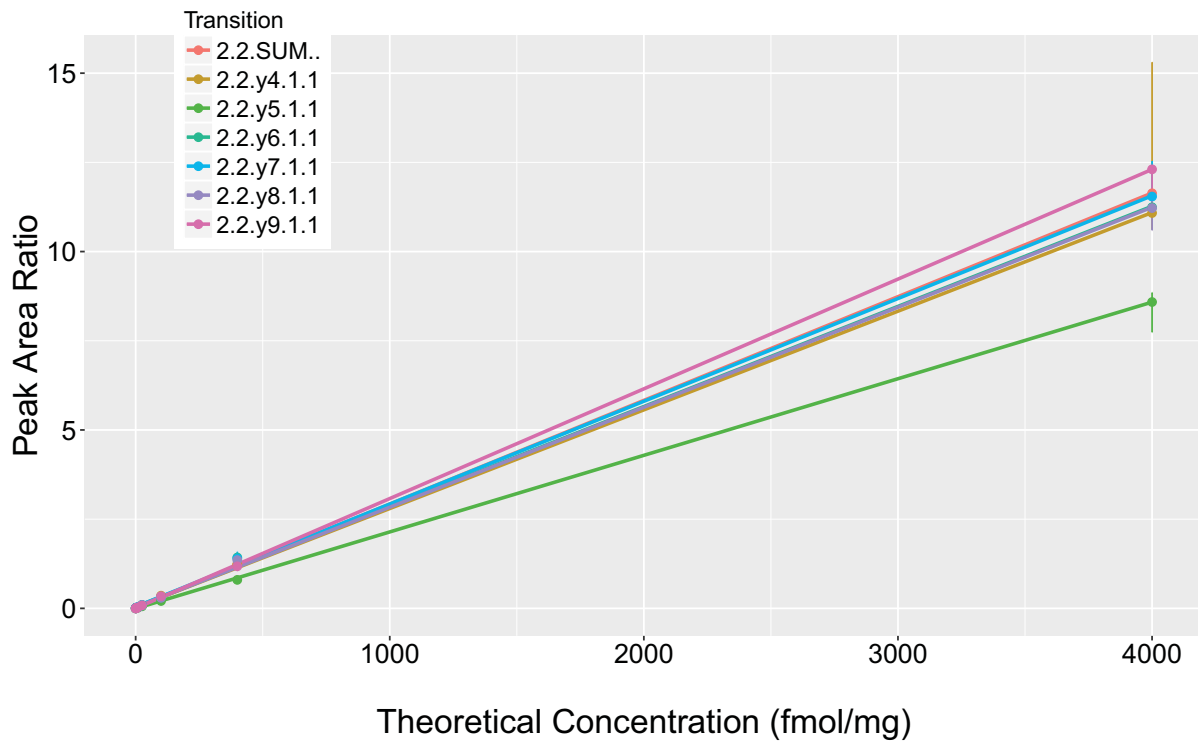

Analyte: sp|P05412|JUN\_HUMAN.NSDLLTS[+80]PDVGLLK

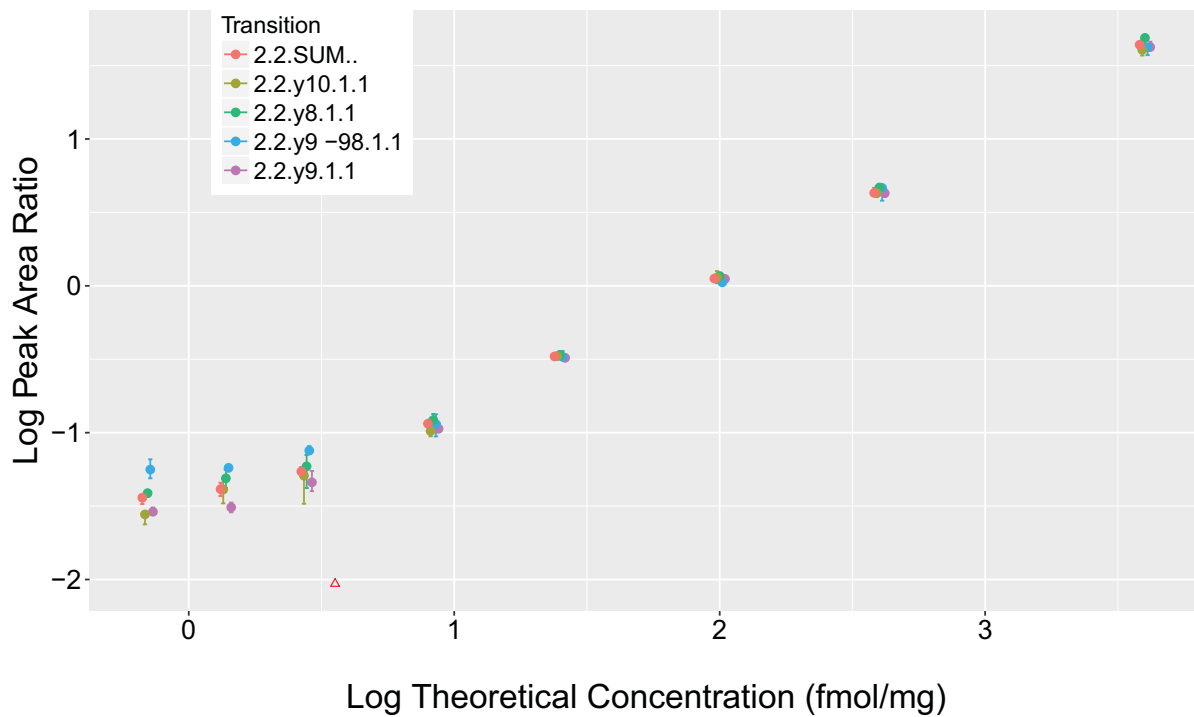

Analyte: sp|P05412|JUN\_HUMAN.NSDLLTS[+80]PDVGLLK

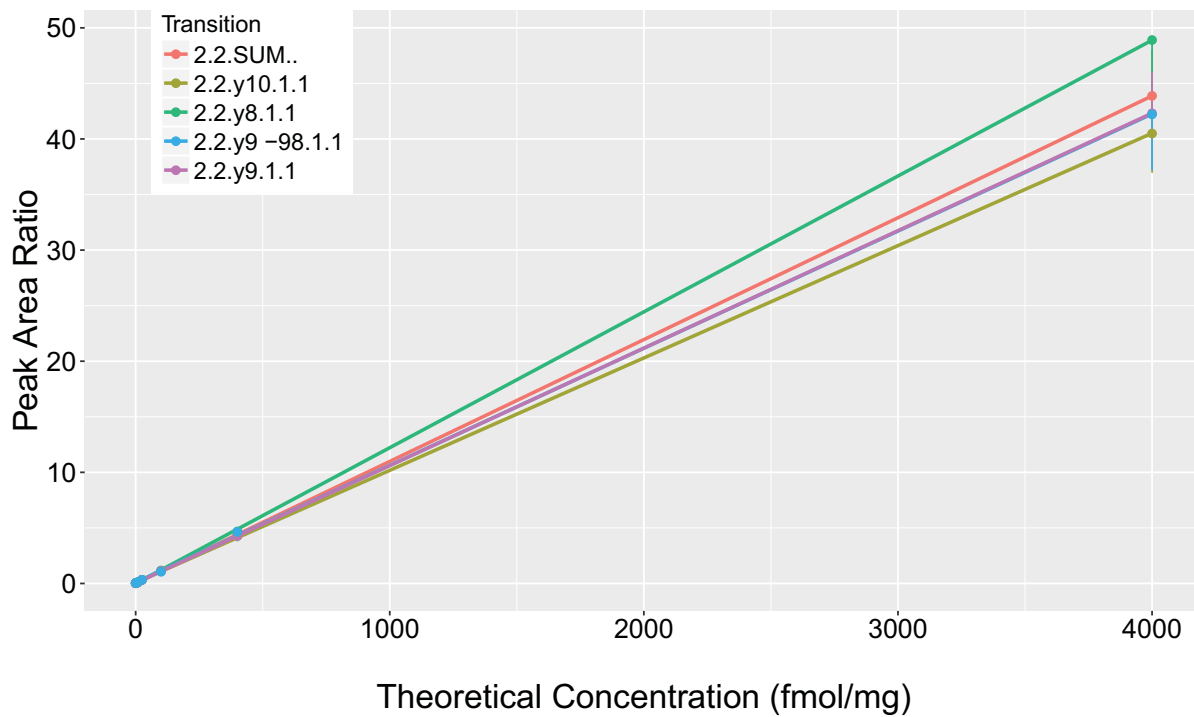

Analyte: sp|P05412|JUN\_HUMAN.NSDLLTSPDVGLLK

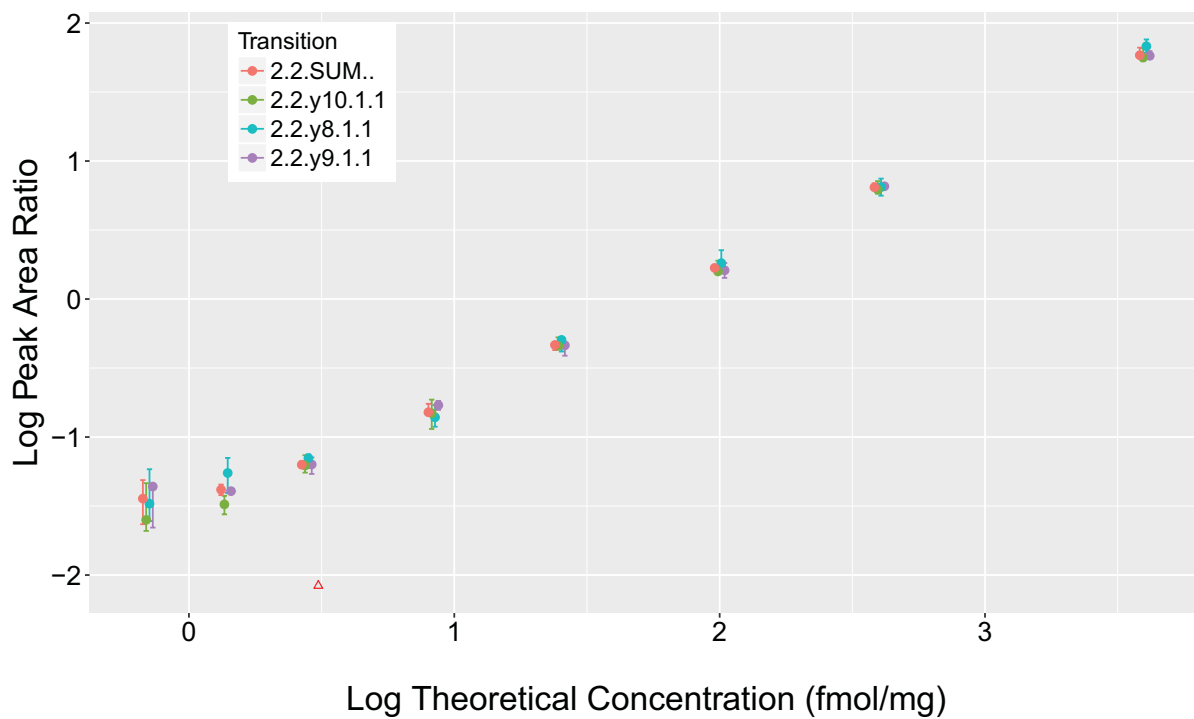

Analyte: sp|P05412|JUN\_HUMAN.NSDLLTSPDVGLLK

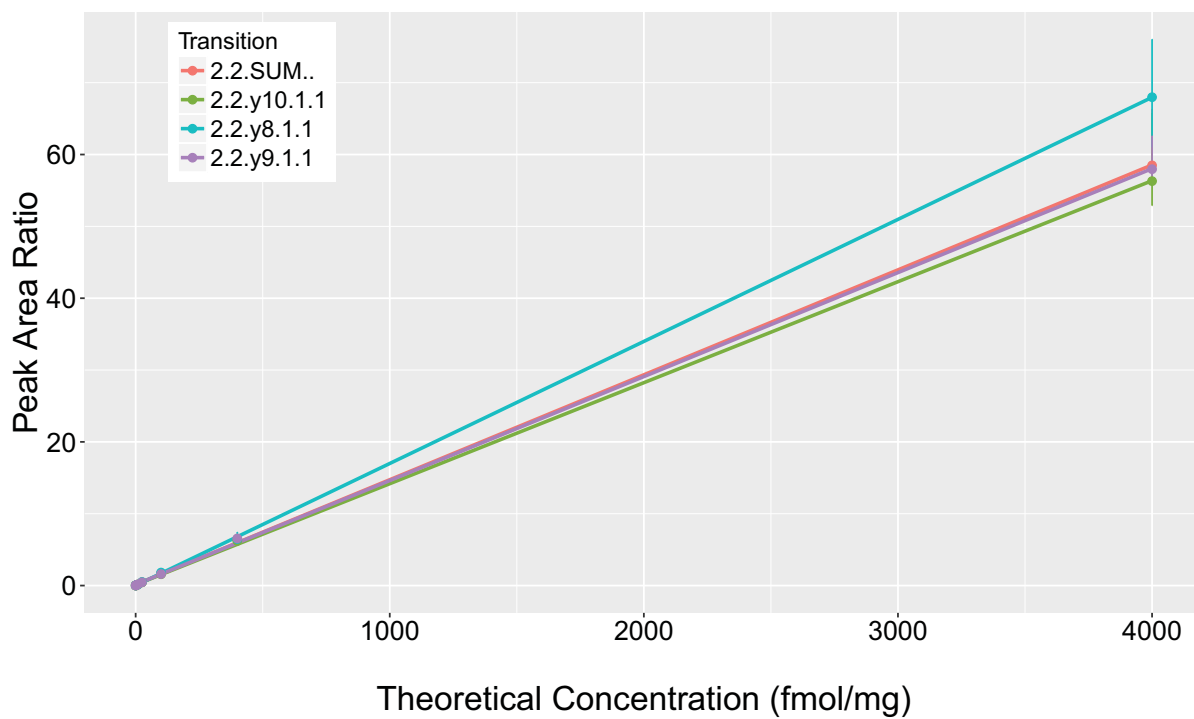

Analyte: sp|P38398|BRCA1\_HUMAN.NYPS[+80]QEELIK

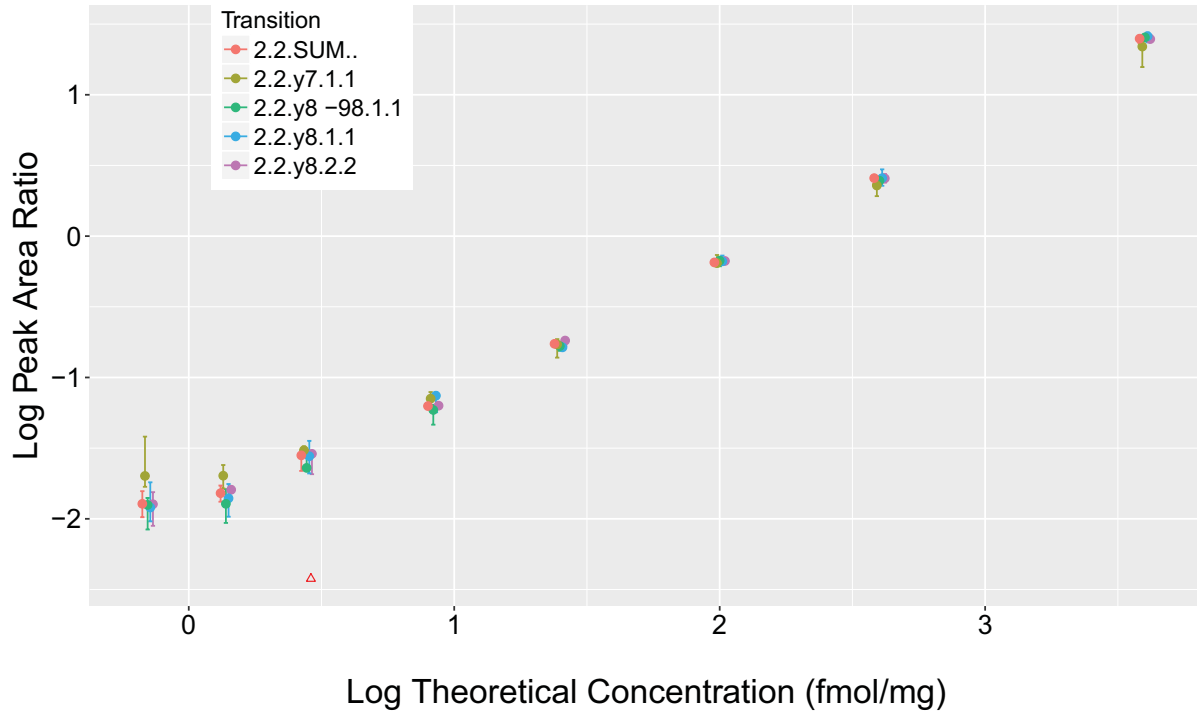

Analyte: sp|P38398|BRCA1\_HUMAN.NYPS[+80]QEELIK

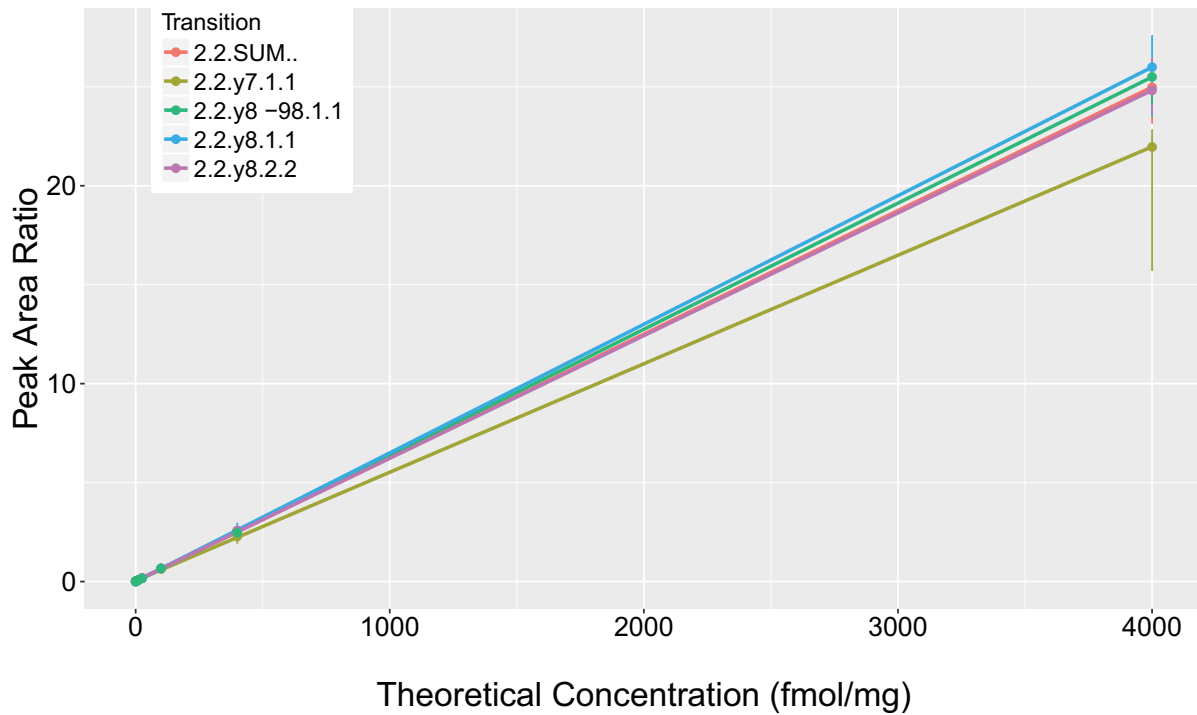

Analyte: sp|P38398|BRCA1\_HUMAN.NYPSQEELIK

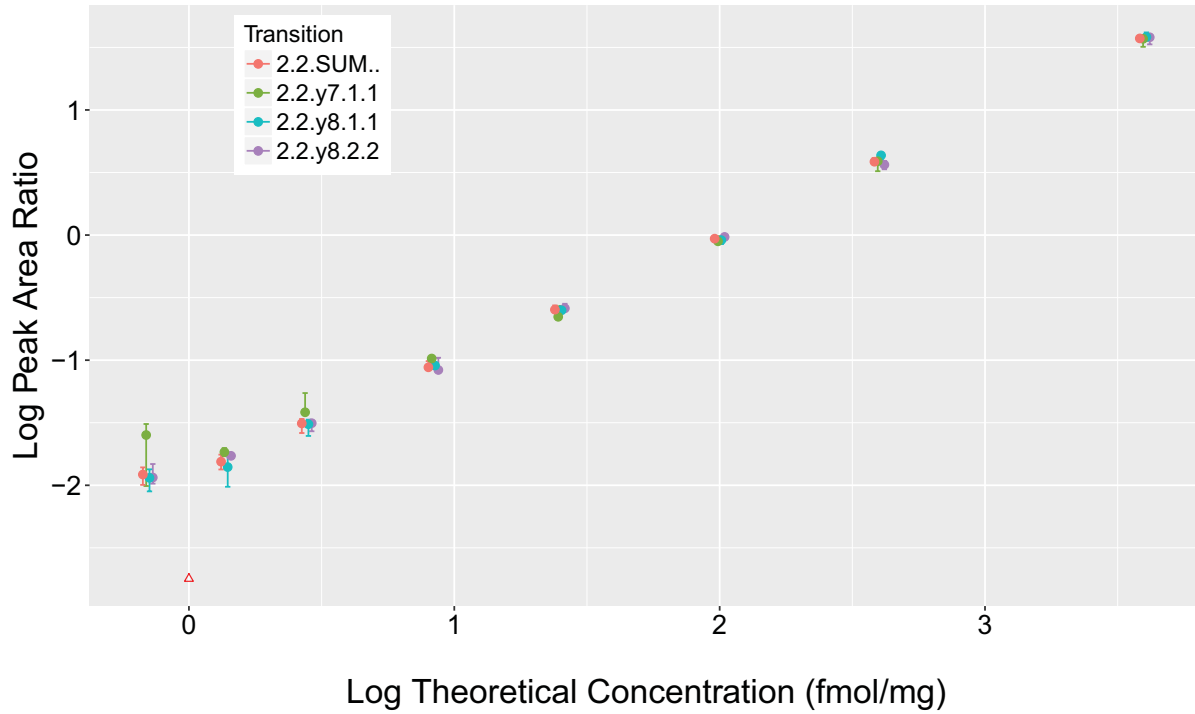

Analyte: sp|P38398|BRCA1\_HUMAN.NYPSQEELIK

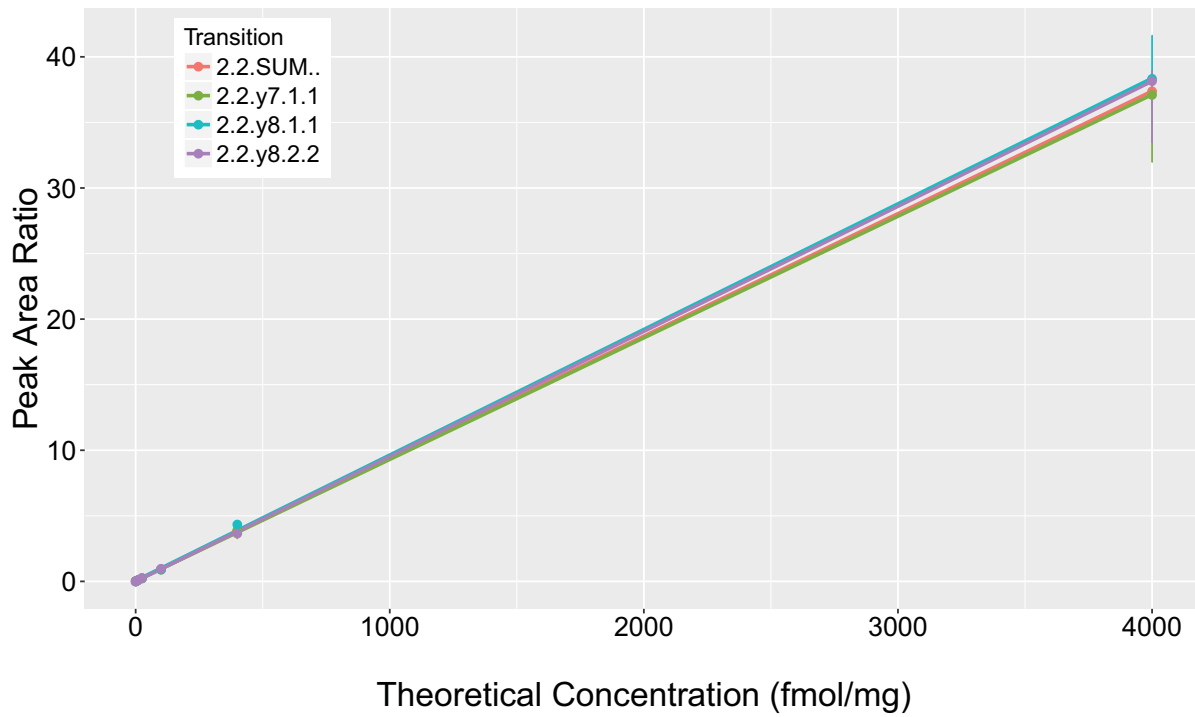

Analyte: sp|O15360|FANCA\_HUMAN.QQAAPDADLSQEPHLF

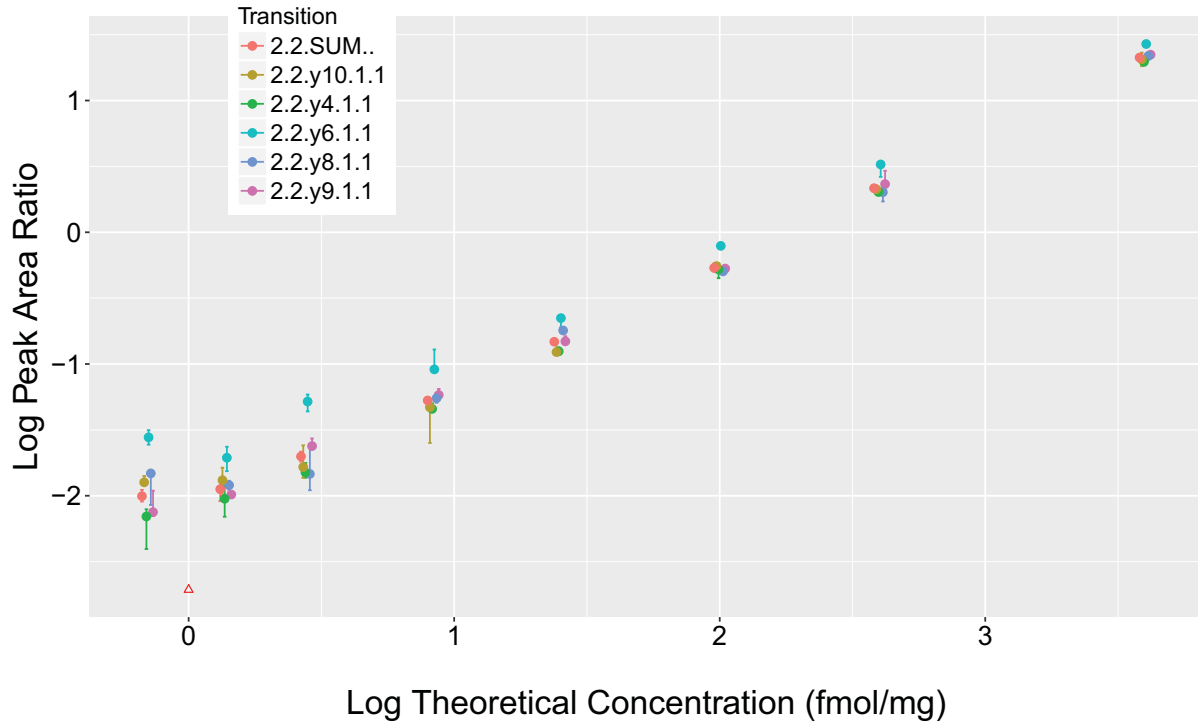

Analyte: sp|O15360|FANCA\_HUMAN.QQAAPDADLSQEPHLF

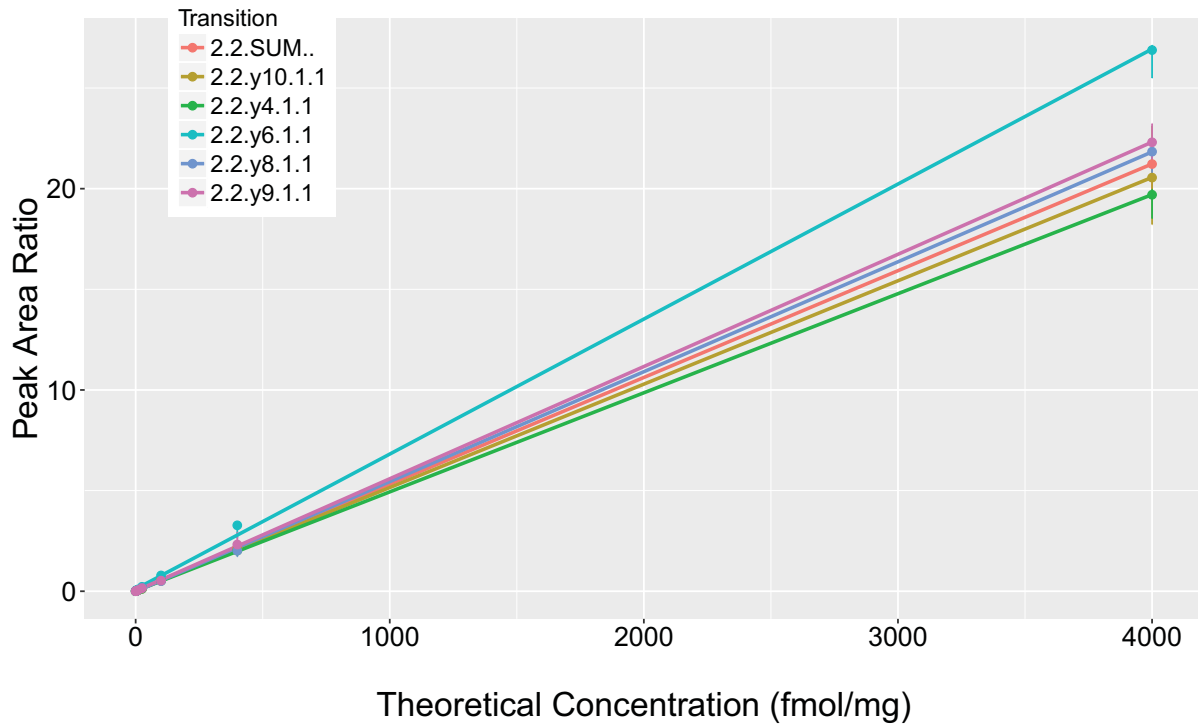

Analyte: sp|Q92547|TOPB1\_HUMAN.QTVPDVNTEPSQNEQIIWDDF

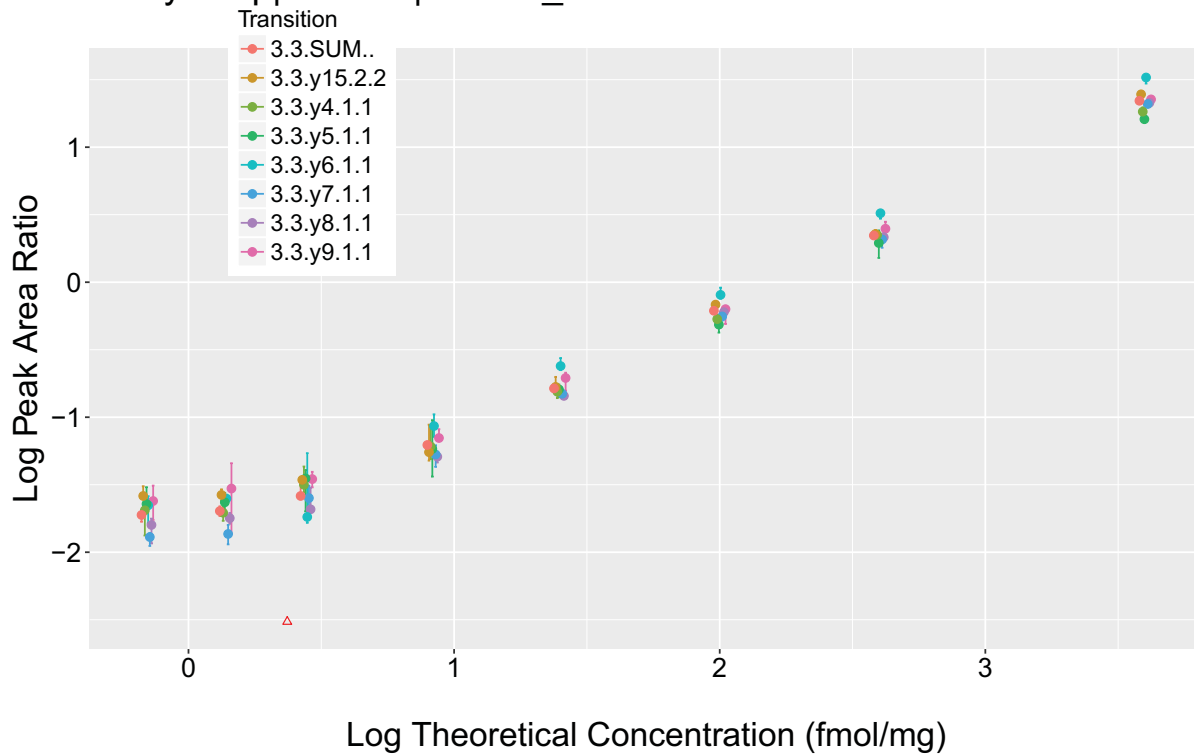

Analyte: sp|Q92547|TOPB1\_HUMAN.QTVPDVNTEPSQNEQIIWDDF

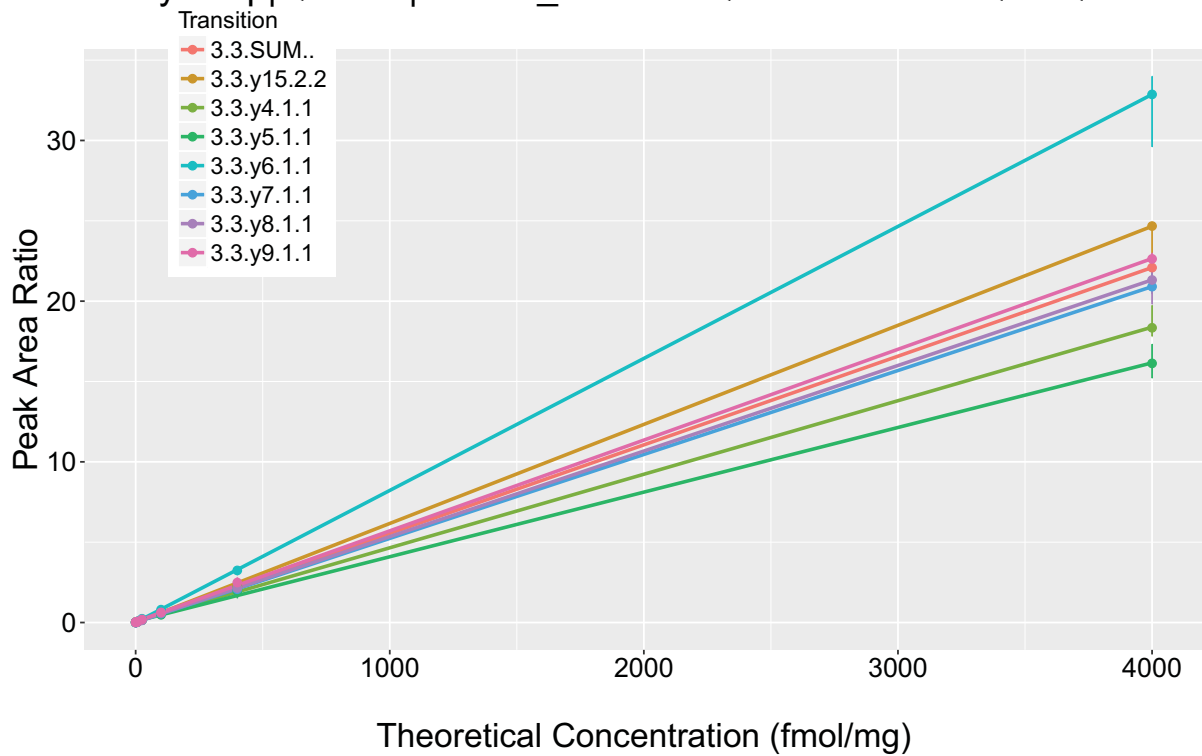



Analyte: sp|Q9NVI1|FANCI\_HUMAN.SADFS[+80]QSTSIGIK

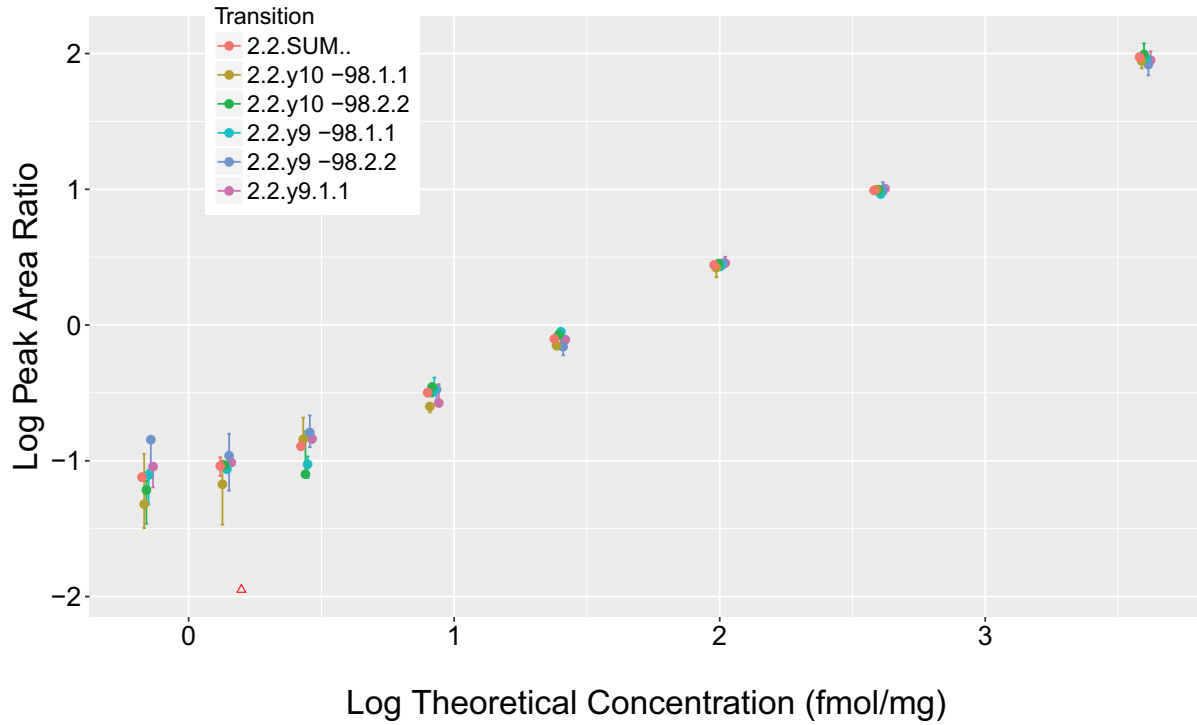

Analyte: sp|Q9NVI1|FANCI\_HUMAN.SADFS[+80]QSTSIGIK

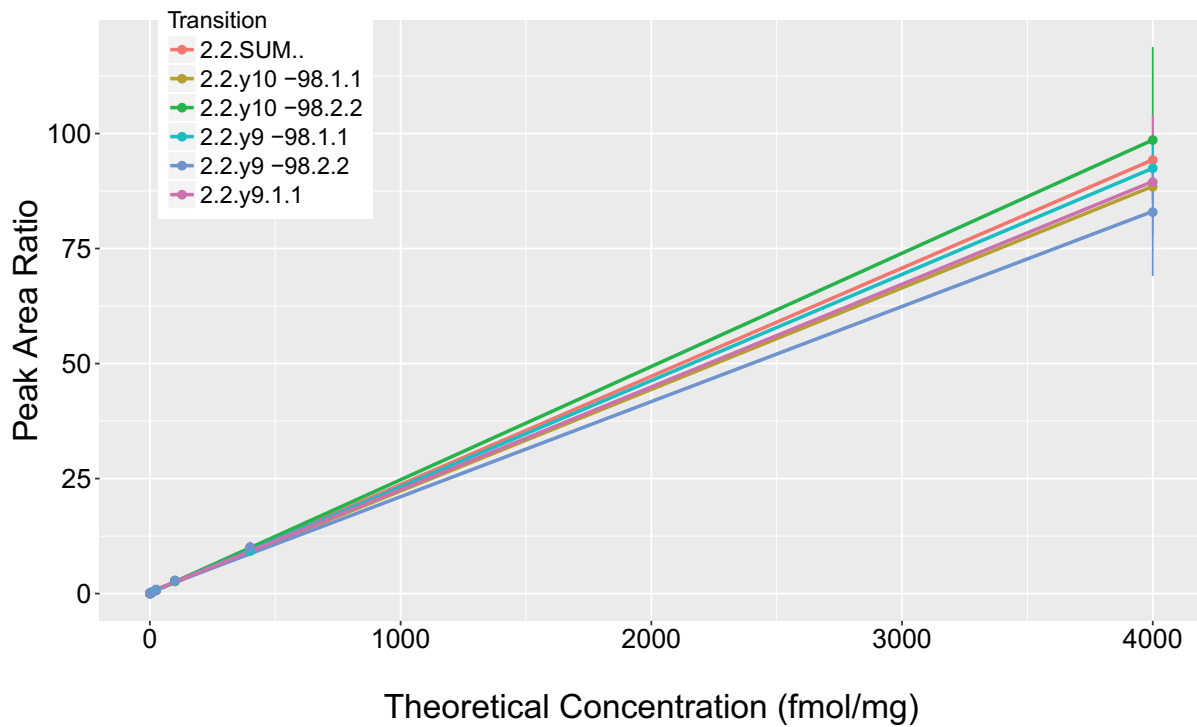

Analyte: sp|O60673|DPOLZ\_HUMAN.SGTLS[+80]PEIFEK

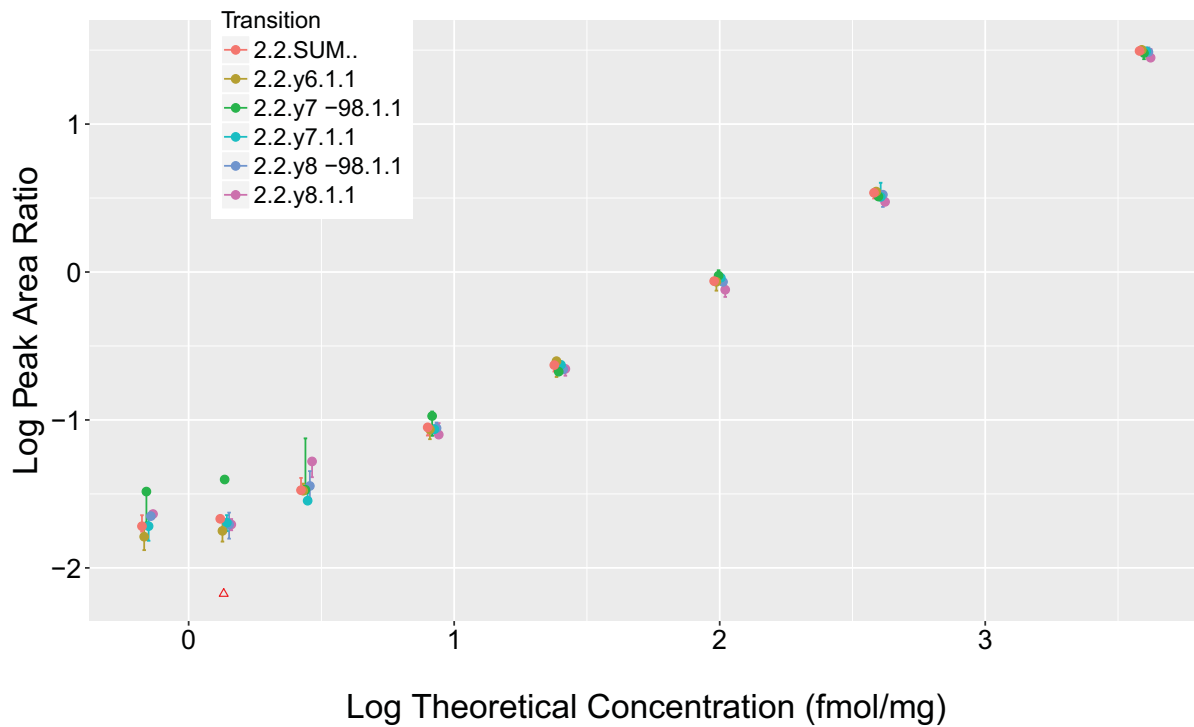

Analyte: sp|O60673|DPOLZ\_HUMAN.SGTLS[+80]PEIFEK

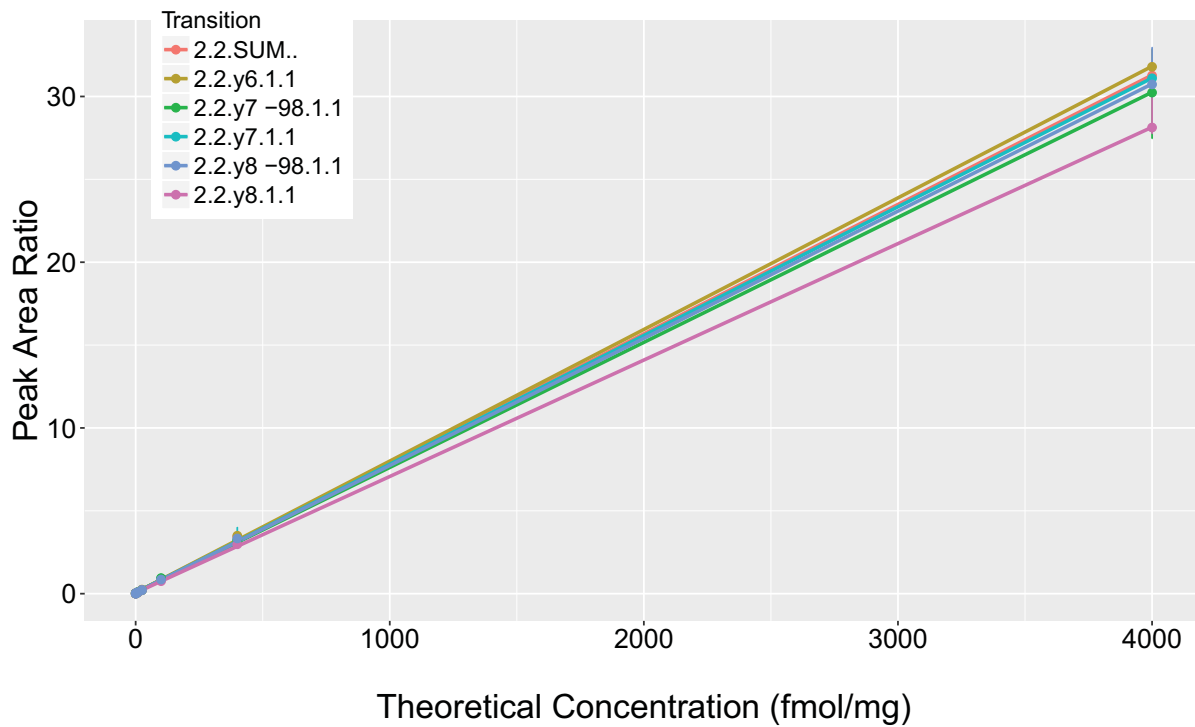

Analyte: sp|O60673|DPOLZ\_HUMAN.SGTLSP EIFEK

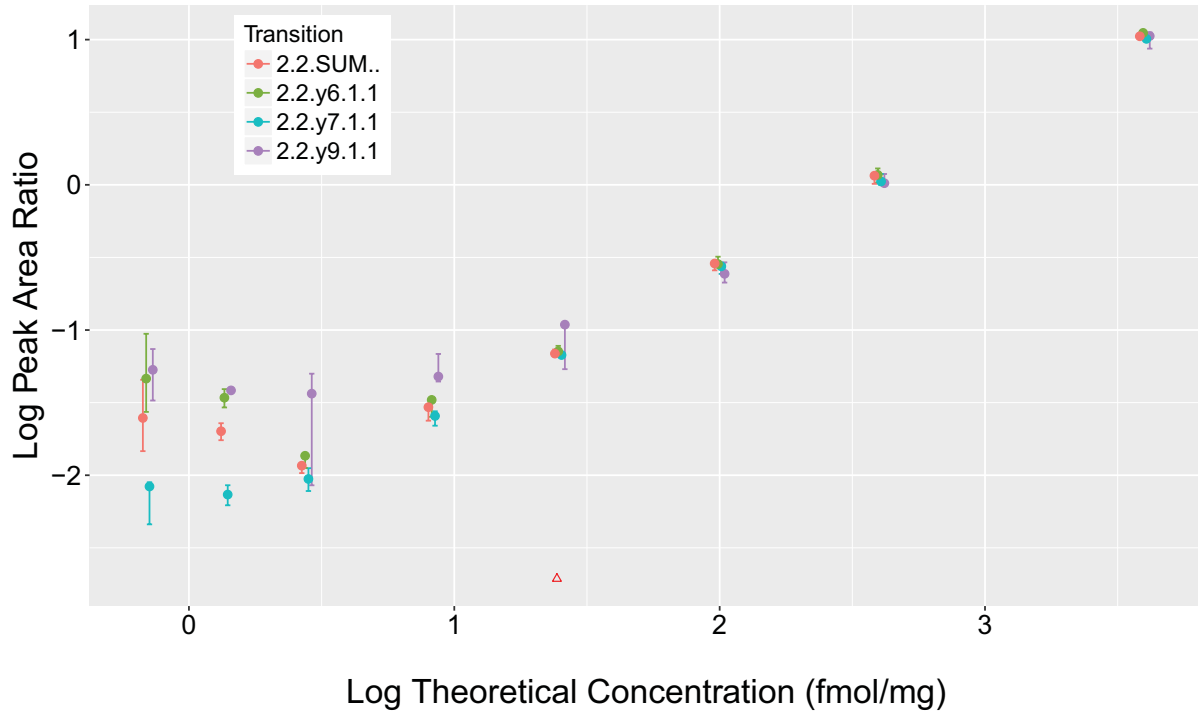

Analyte: sp|O60673|DPOLZ\_HUMAN.SGTLSP EIFEK

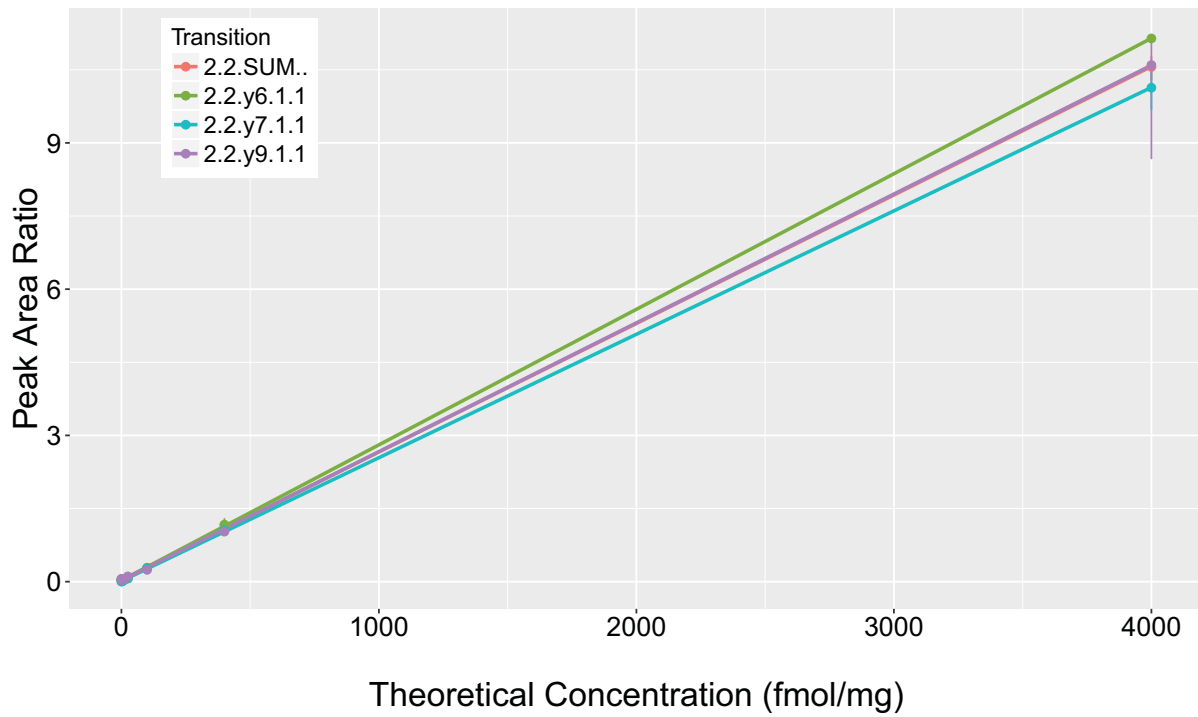

Analyte: sp|P39748|FEN1\_HUMAN.SIEEIVR

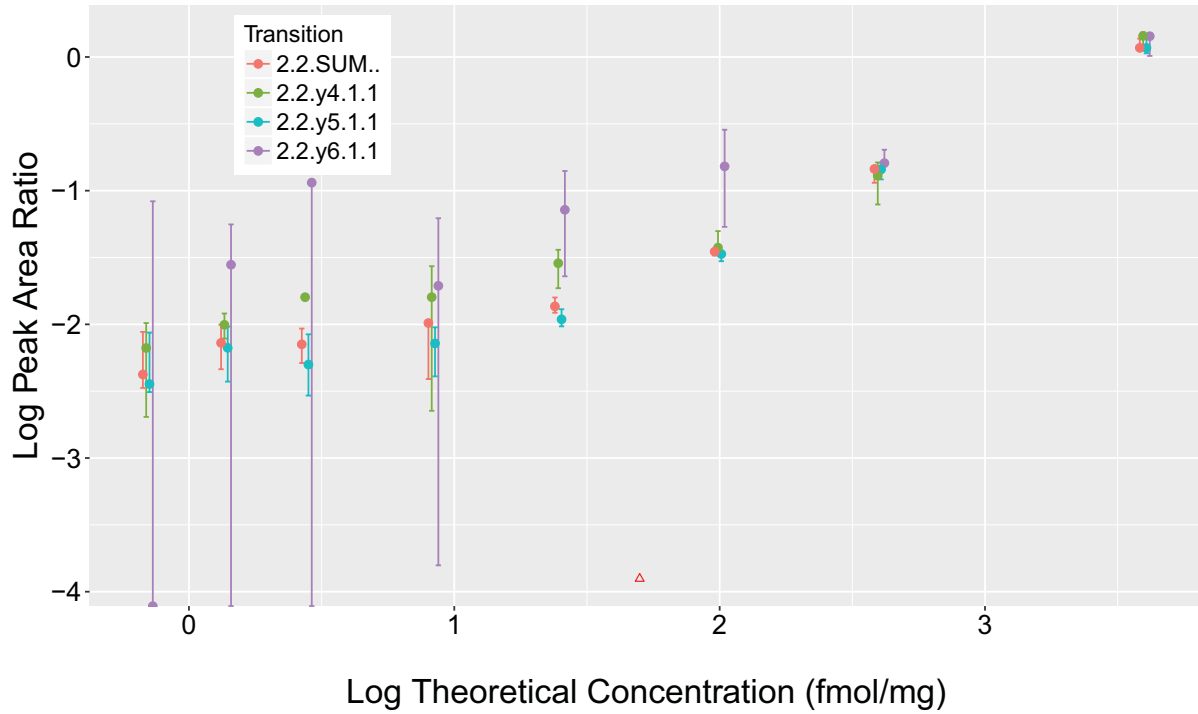

Analyte: sp|P39748|FEN1\_HUMAN.SIEEIVR

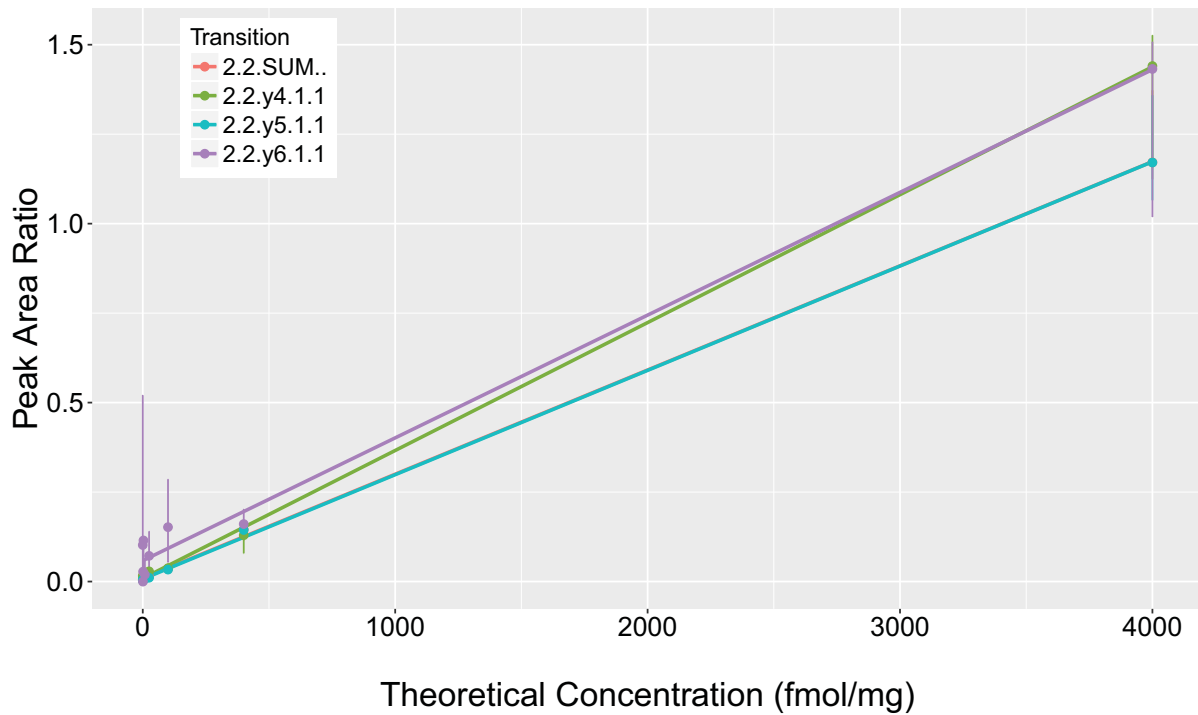

Analyte: sp|Q13315|ATM\_HUMAN.SLEIS[+80]QSYTTTQR

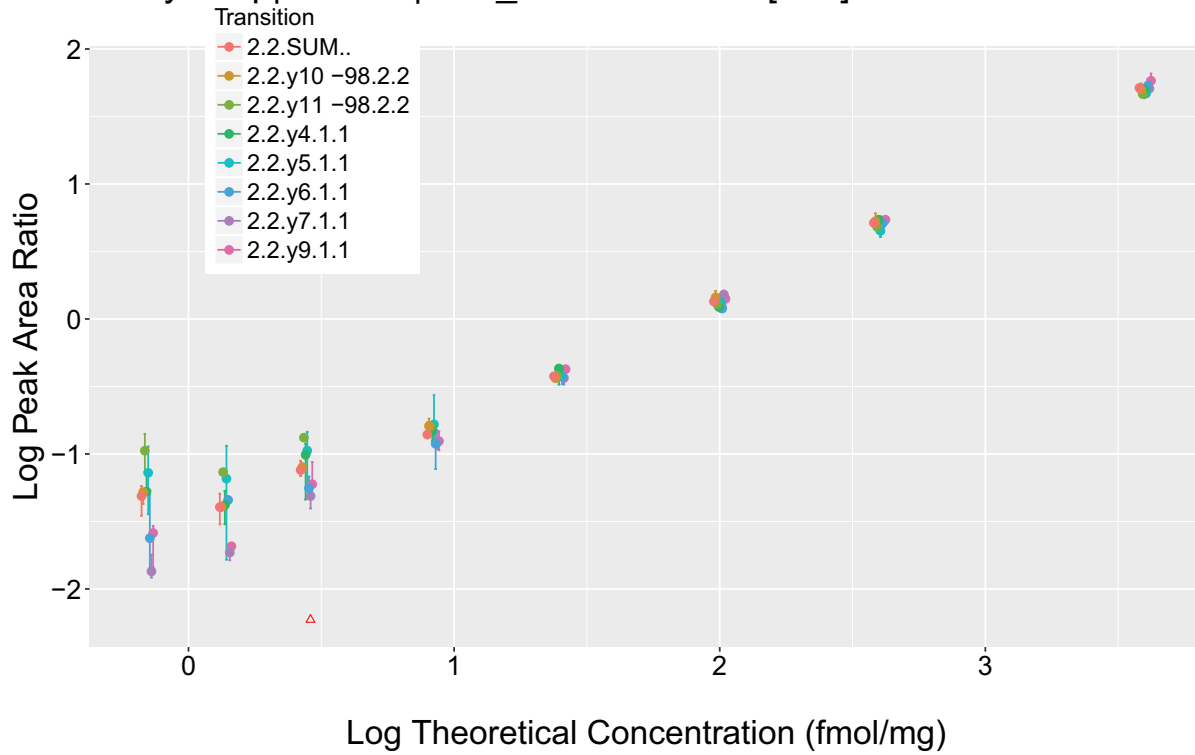

Analyte: sp|Q13315|ATM\_HUMAN.SLEIS[+80]QSYTTTQR

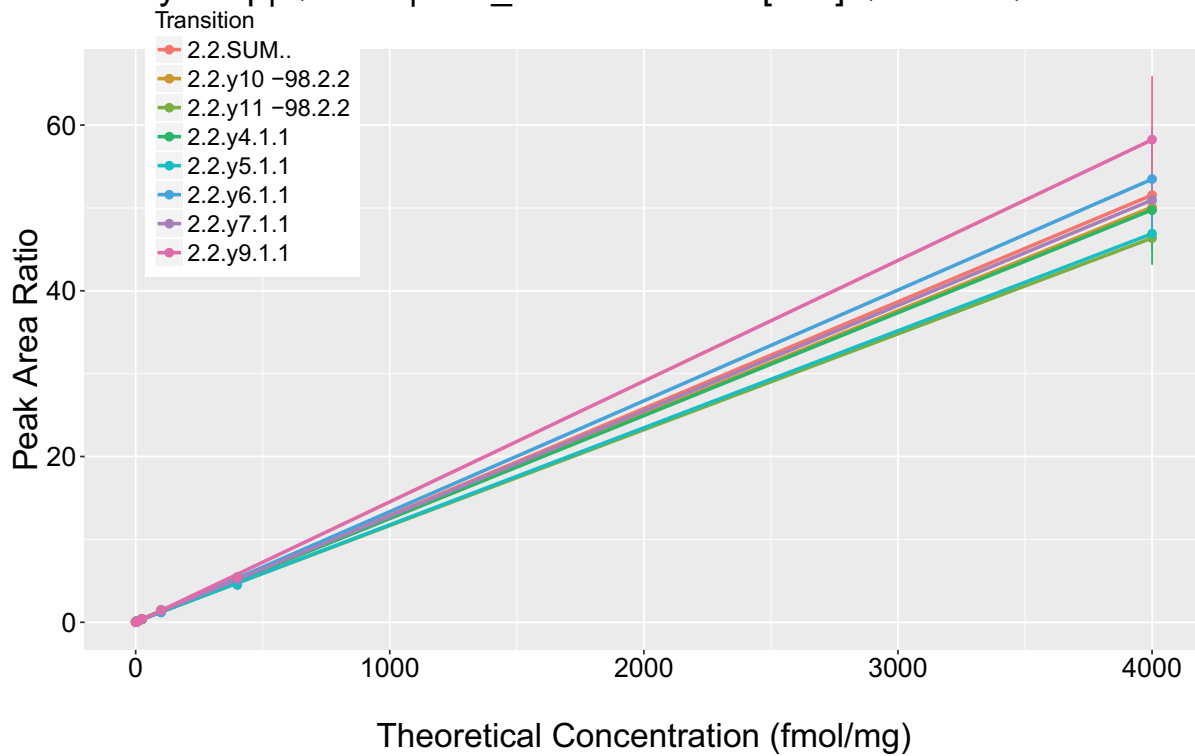

Analyte: sp|Q13315|ATM\_HUMAN.SLEISQSYTTTQR

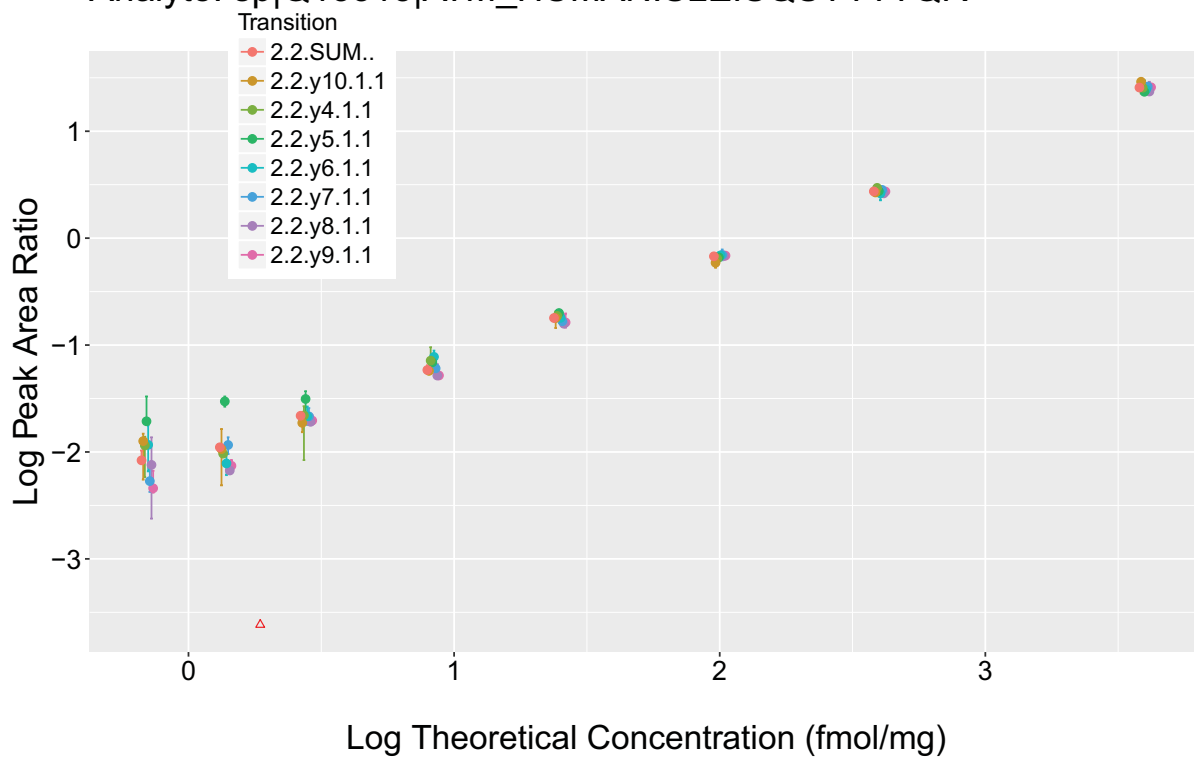

Analyte: sp|Q13315|ATM\_HUMAN.SLEISQSYTTTQR

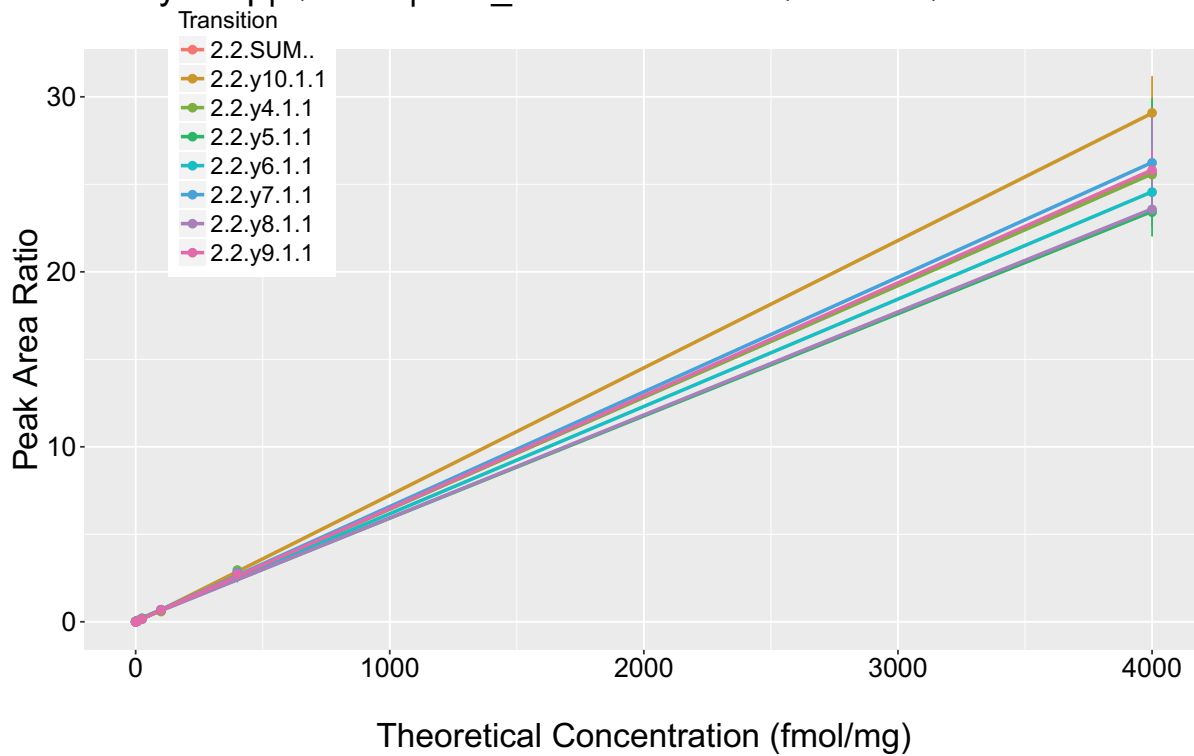

Analyte: sp|P51587|BRCA2\_HUMAN.TS[+80]VSQTSLLEAK

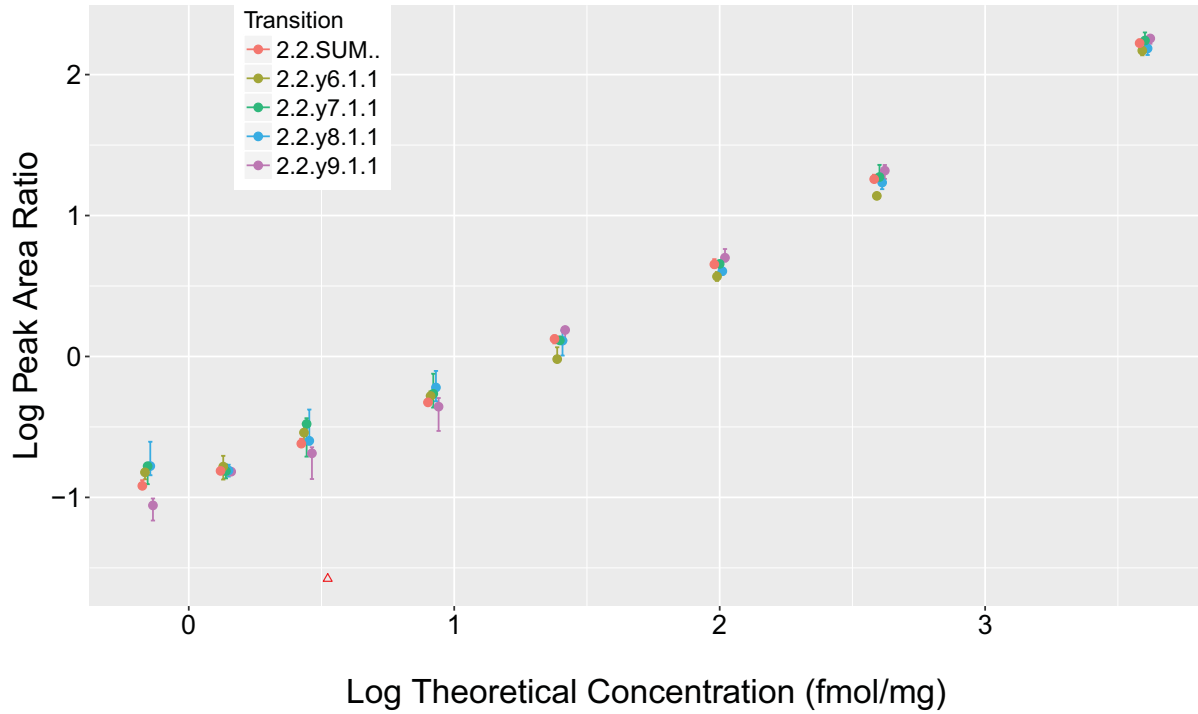

Analyte: sp|P51587|BRCA2\_HUMAN.TS[+80]VSQTSLLEAK

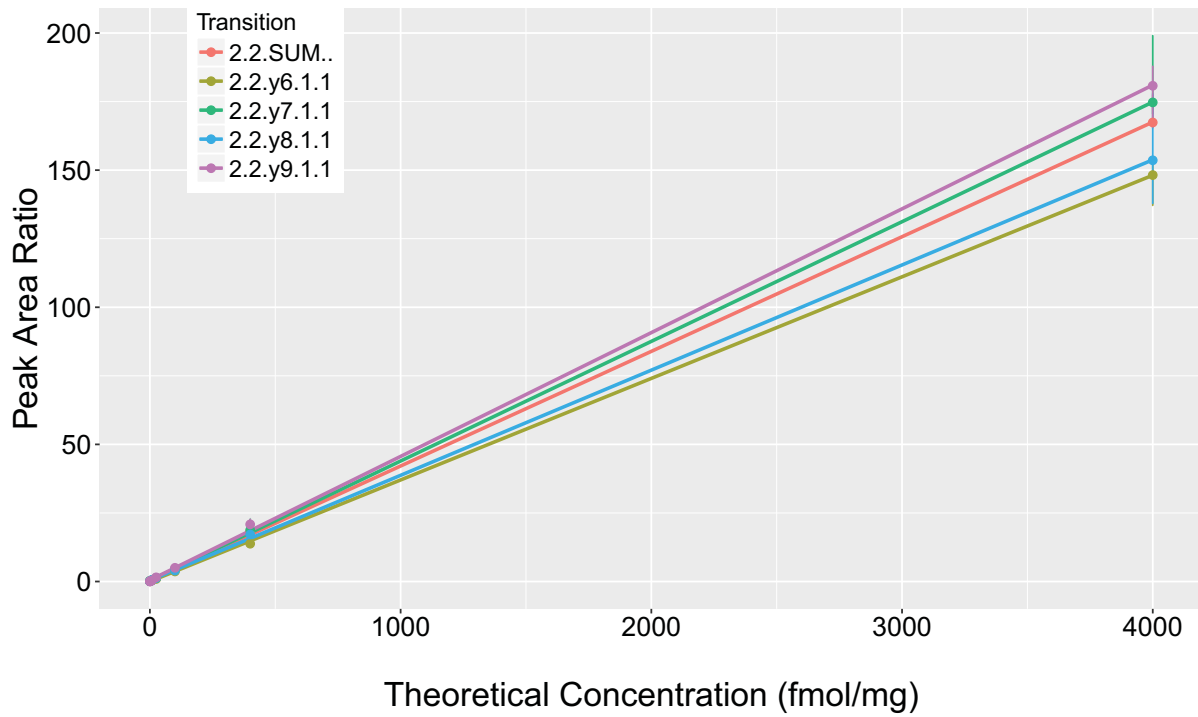

Analyte: sp|P51587|BRCA2\_HUMAN.TSVSQTSLLEAK

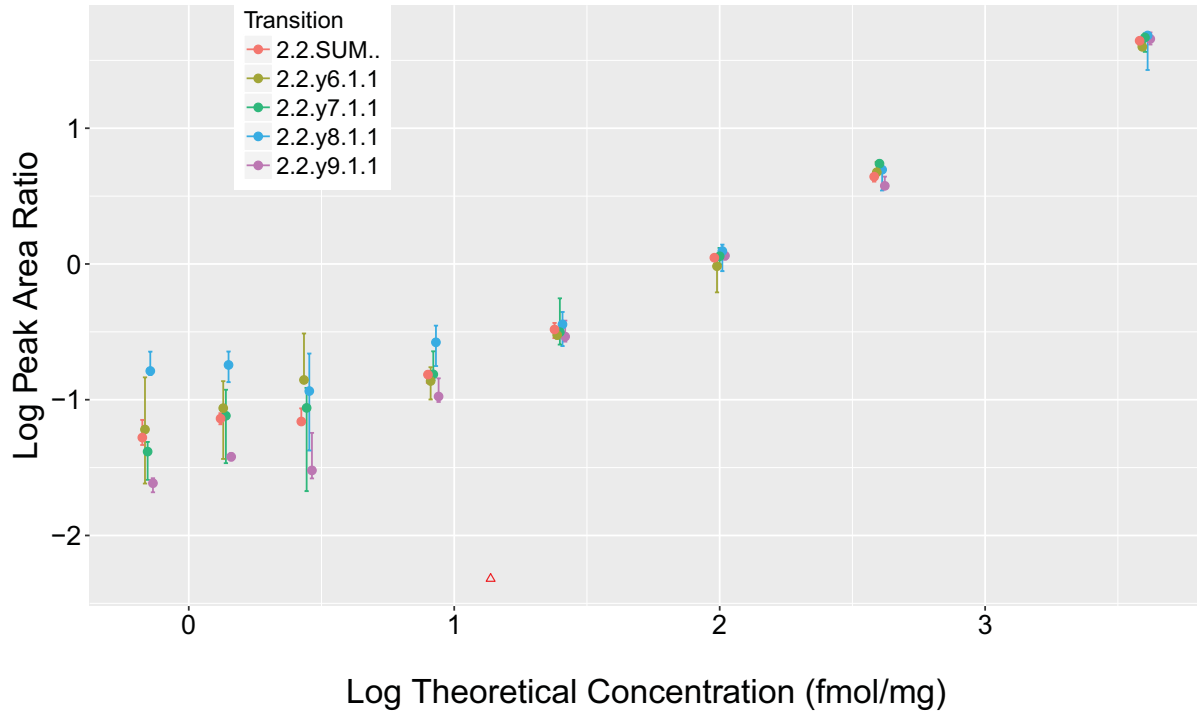

Analyte: sp|P51587|BRCA2\_HUMAN.TSVSQTSLLEAK

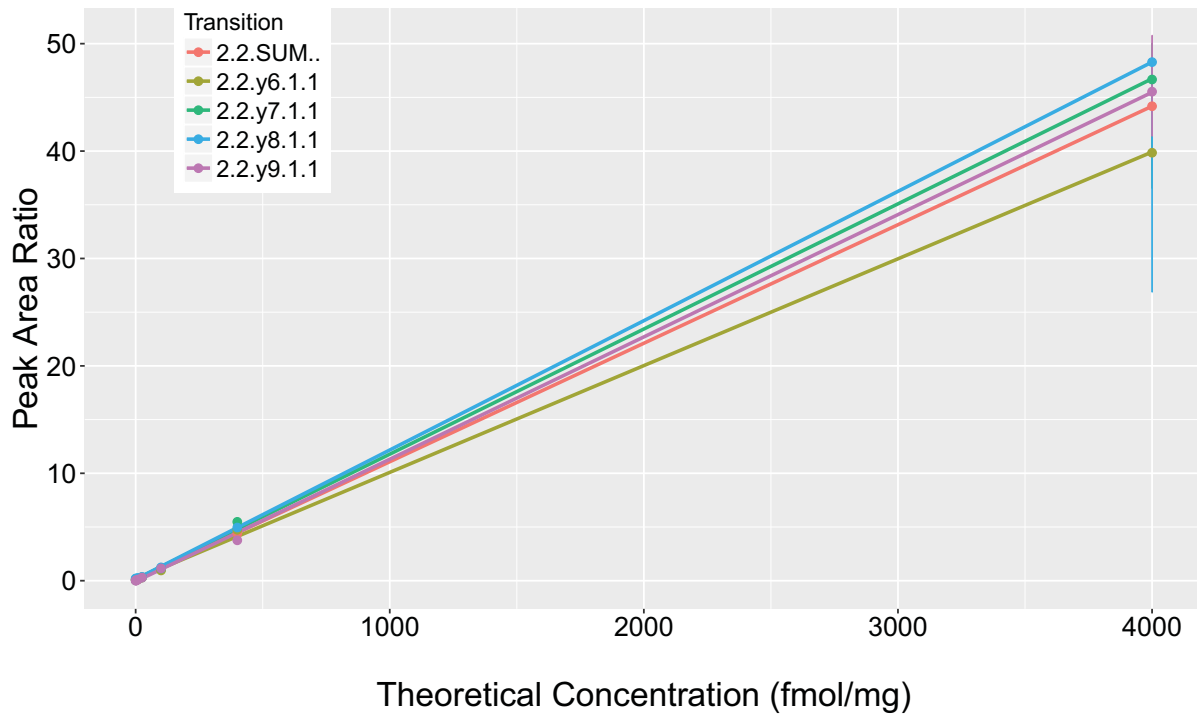



Analyte: sp|O60934|NBN\_HUMAN.TTTPGPSLS[+80]QGVSVDEK

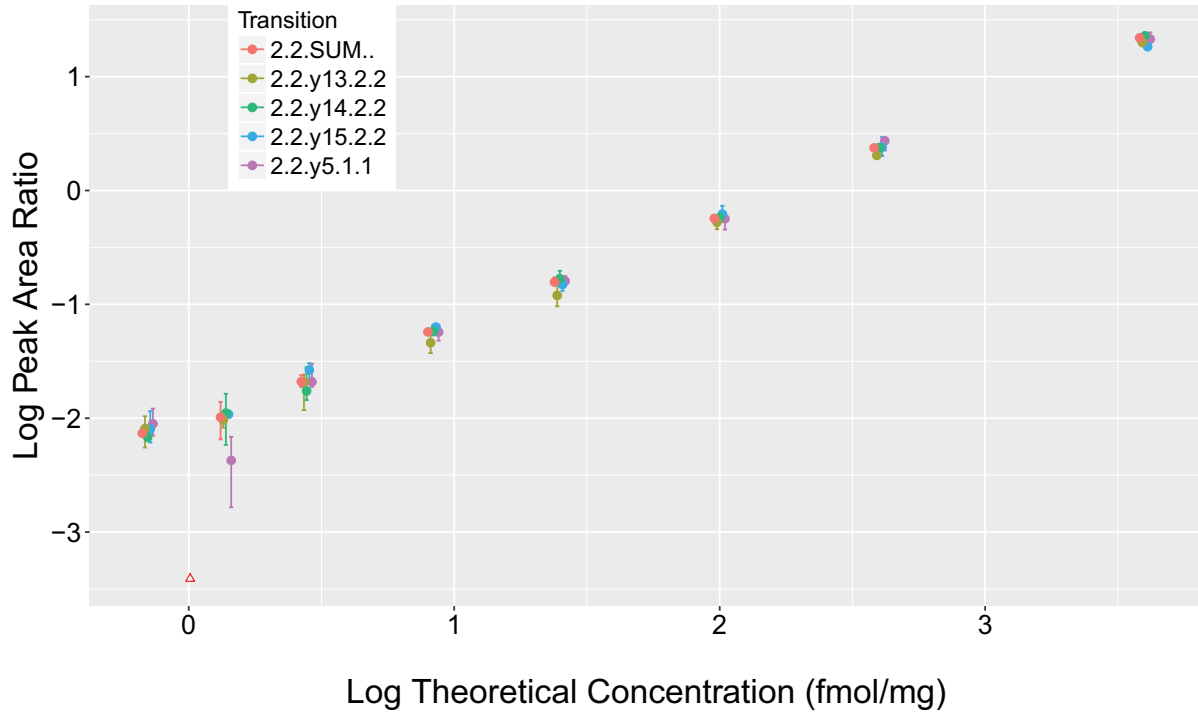

Analyte: sp|O60934|NBN\_HUMAN.TTTPGPSLS[+80]QGVSVDEK

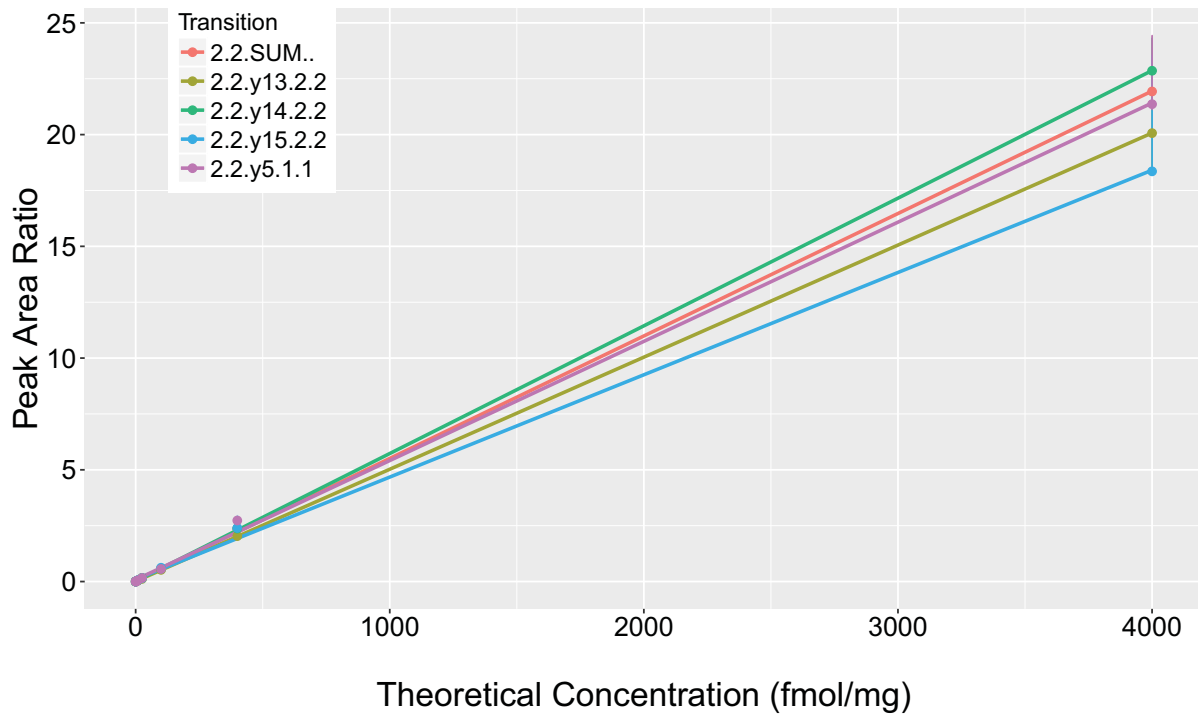

Analyte: sp|O60934|NBN\_HUMAN.TTTPGPSLSQGVSVDEK

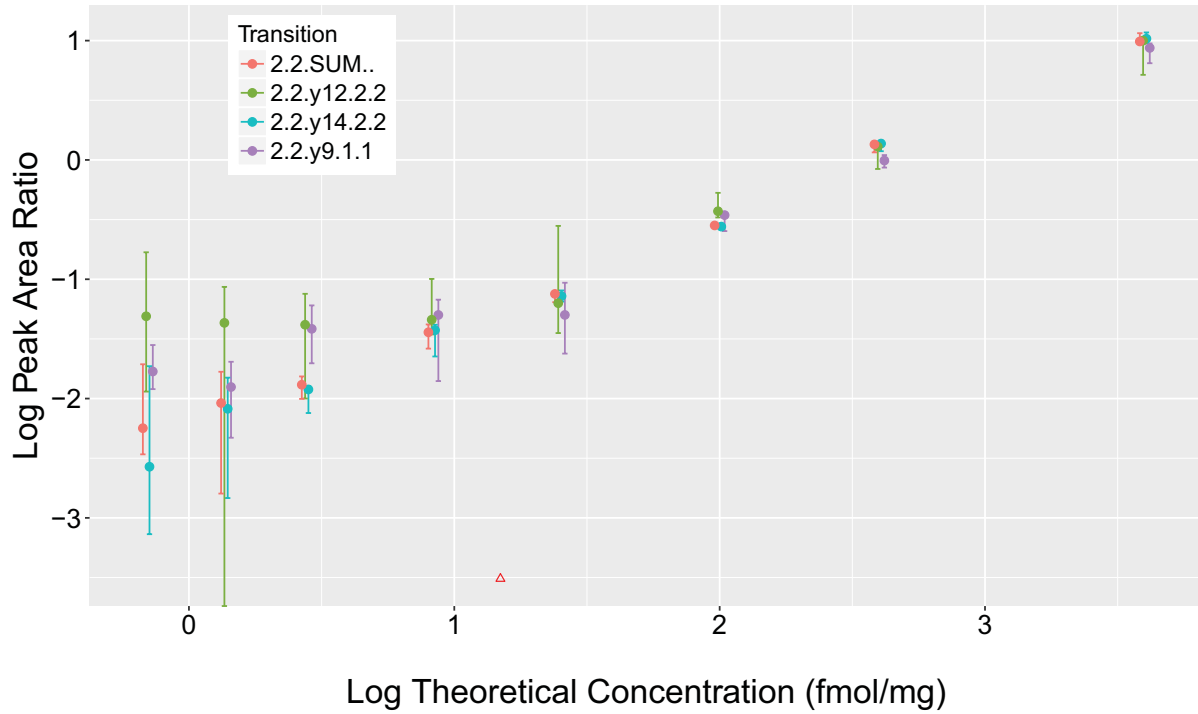

Analyte: sp|O60934|NBN\_HUMAN.TTTPGPSLSQGVSVDEK

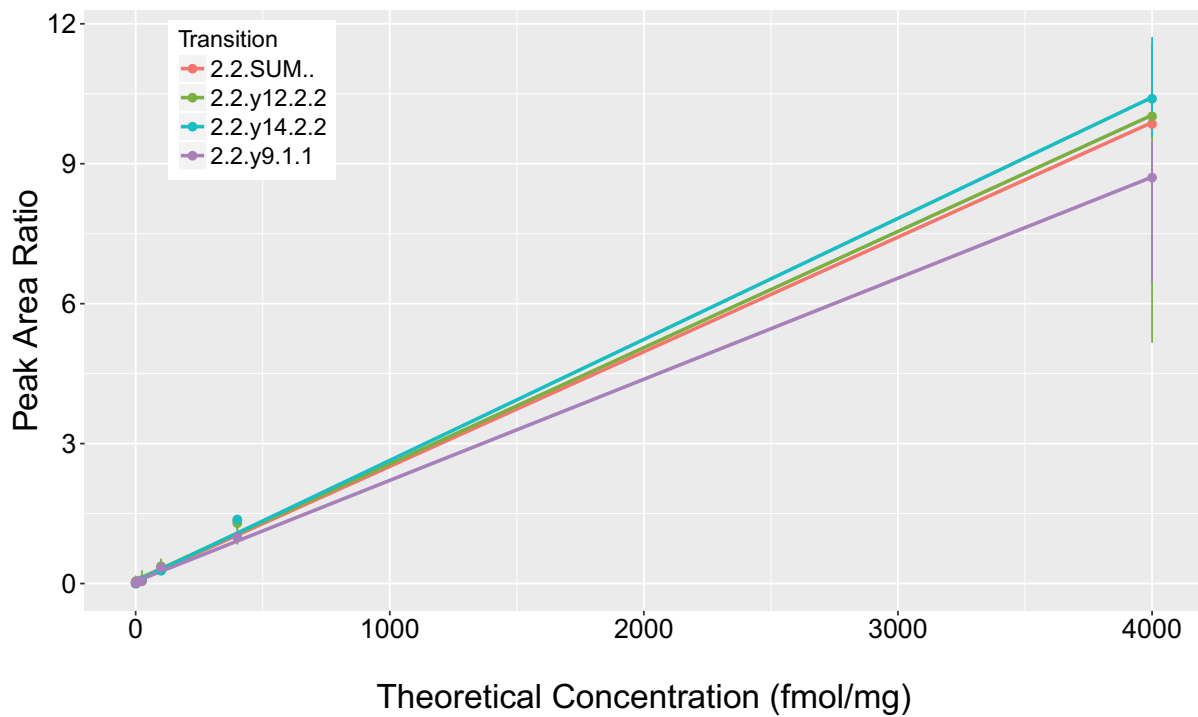

Analyte: sp|P09211|GSTP1\_HUMAN.YISLIYTNYEAGK

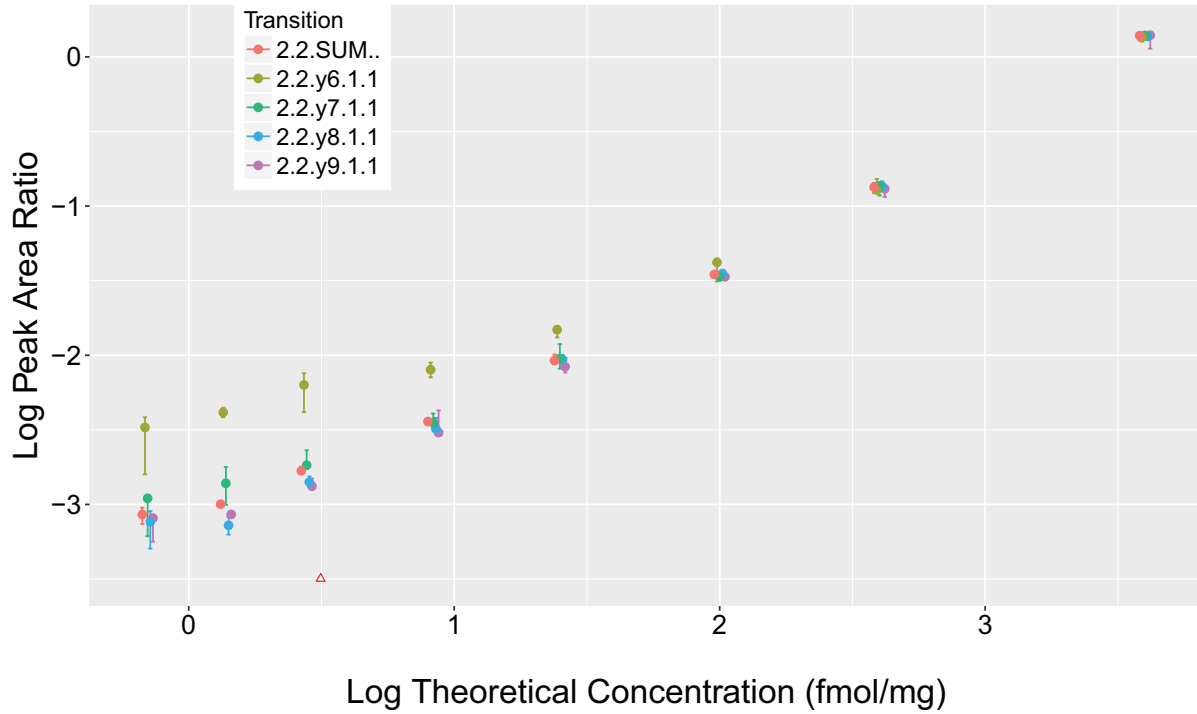

Analyte: sp|P09211|GSTP1\_HUMAN.YISLIYTNYEAGK

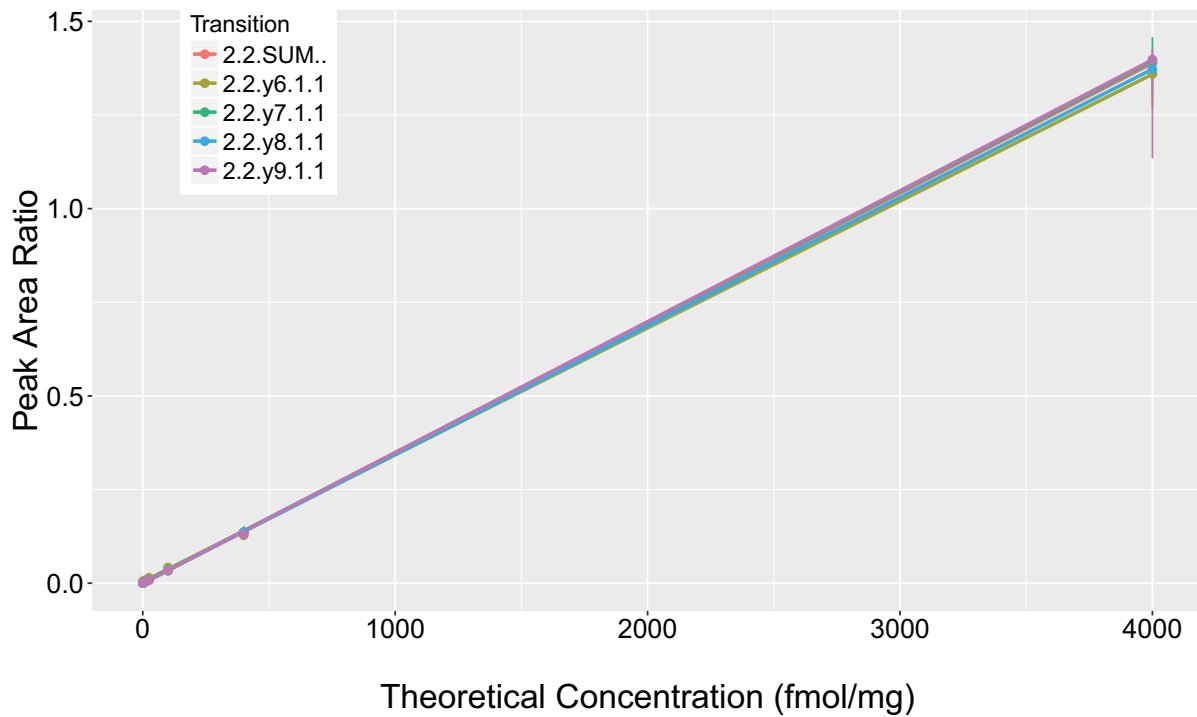

Analyte: sp|O14757|CHK1\_HUMAN.YSSS[+80]QPEPR

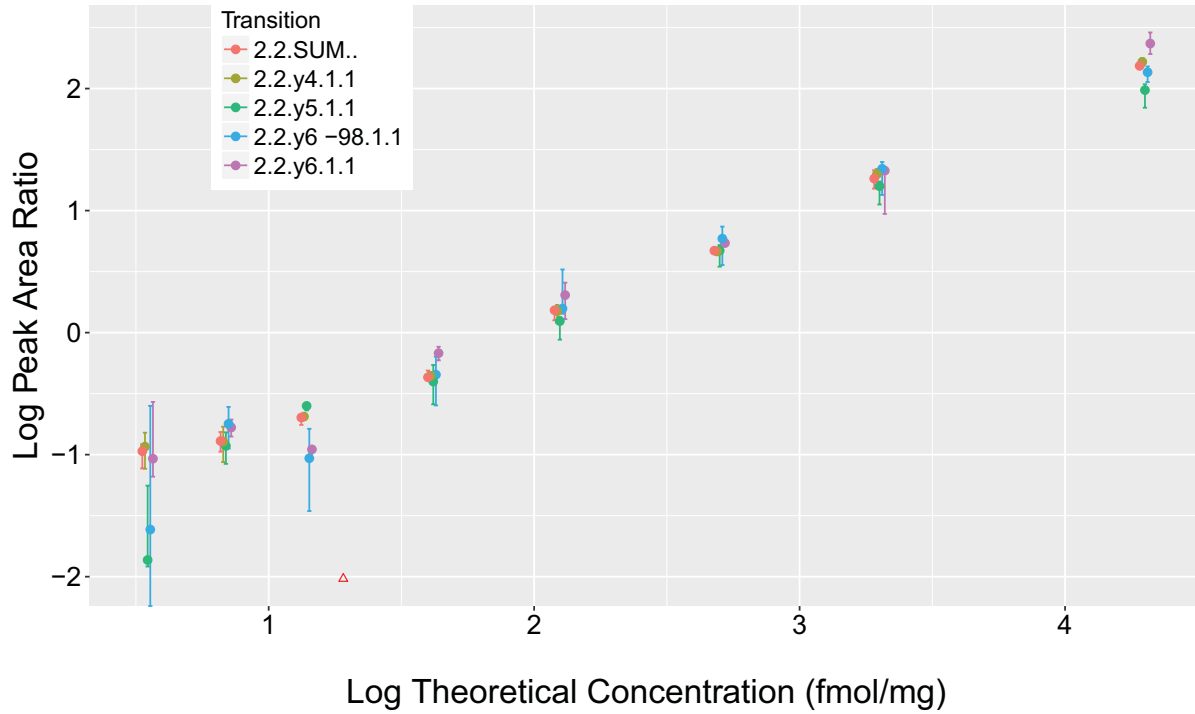

Analyte: sp|O14757|CHK1\_HUMAN.YSSS[+80]QPEPR

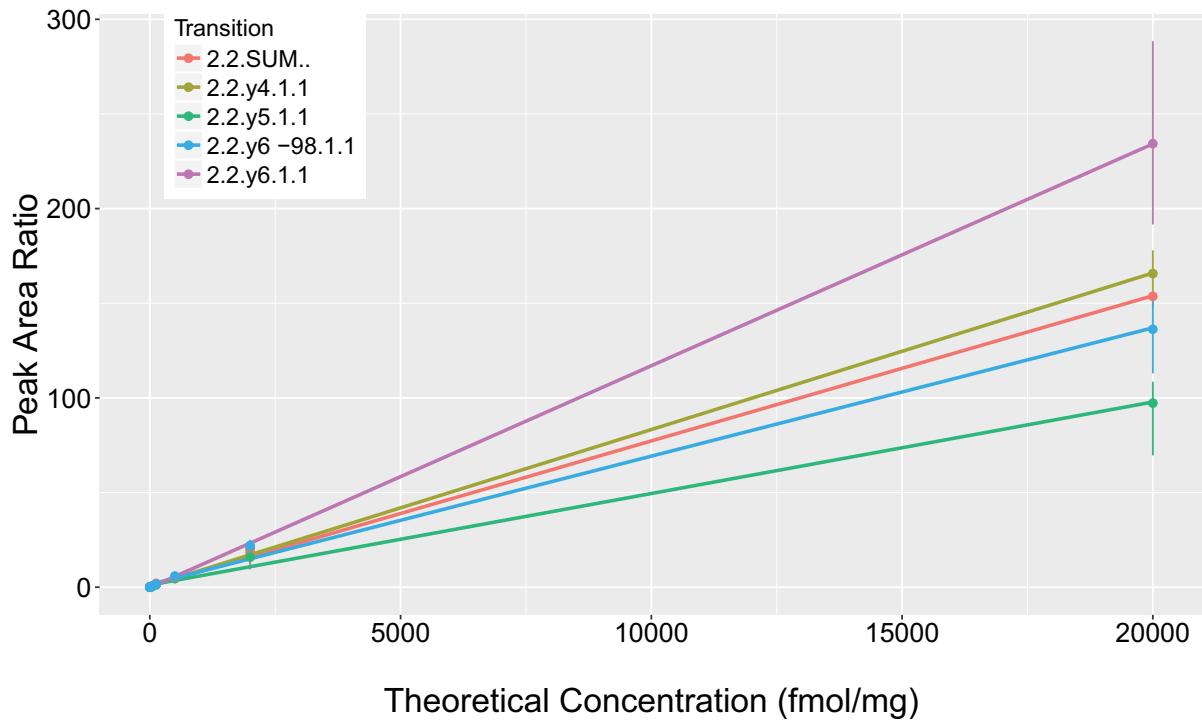

Analyte: sp|O14757|CHK1\_HUMAN.YSSSQPEPR

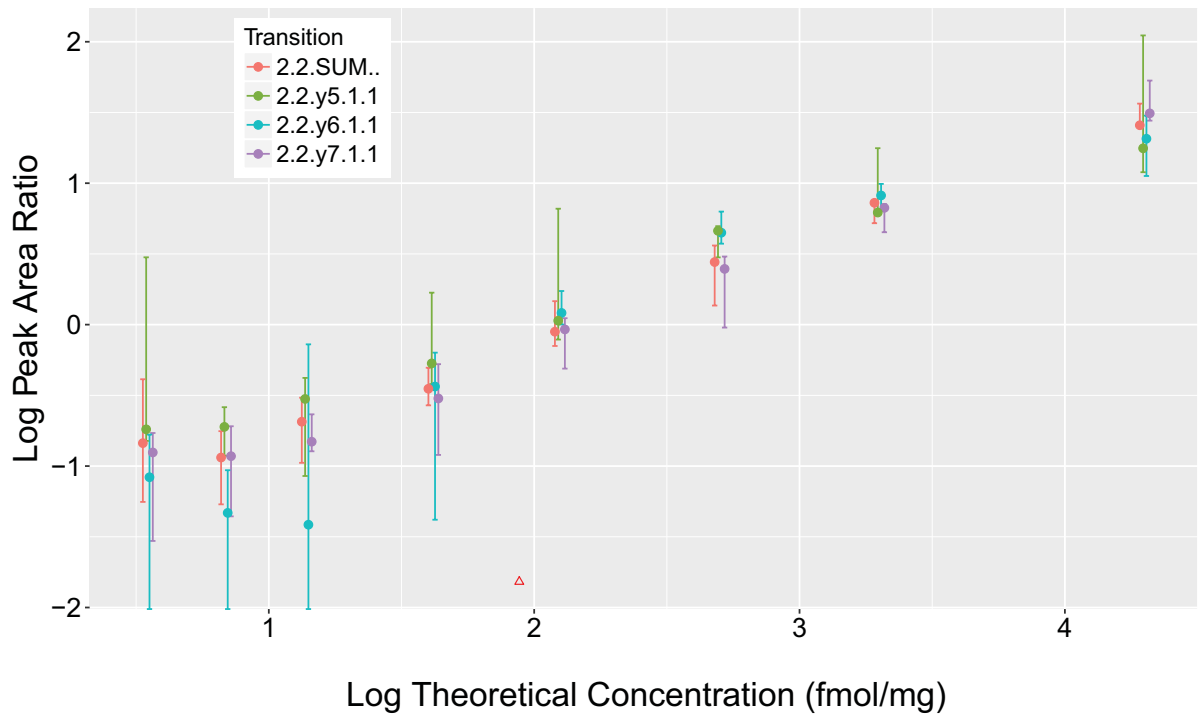

Analyte: sp|O14757|CHK1\_HUMAN.YSSSQPEPR

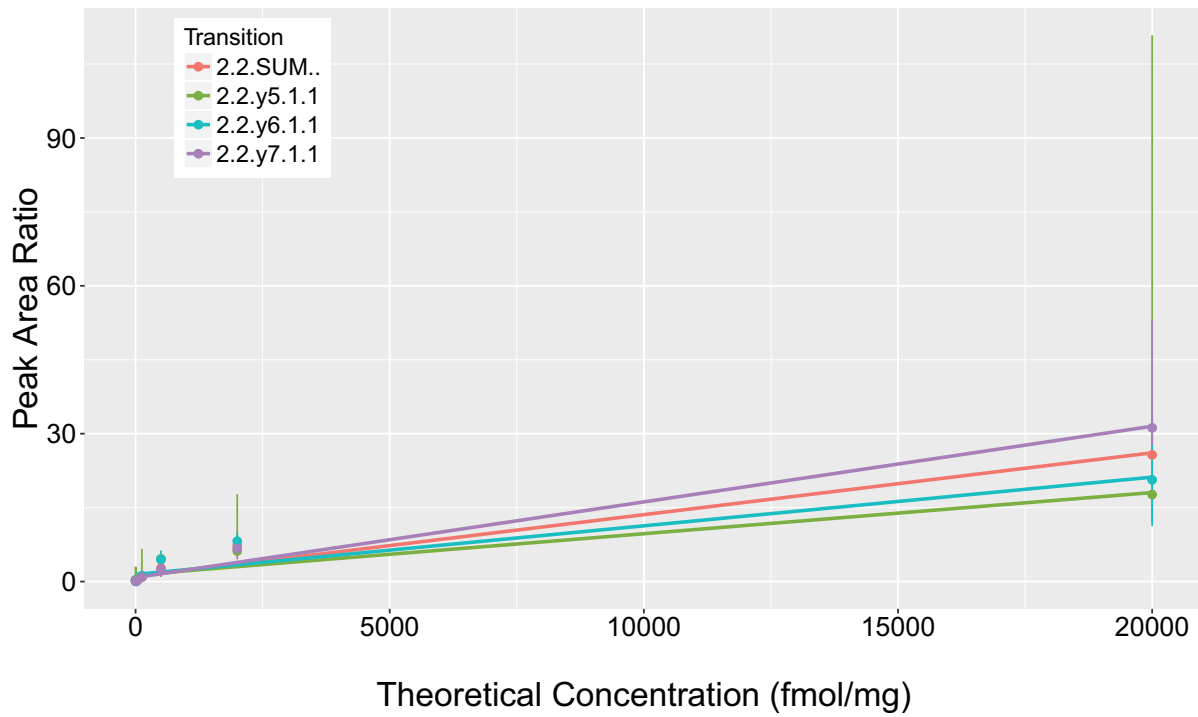

Analyte: sp|Q9BX63|FANCJ\_HUMAN.YSTPPYLLEAASHLSPENFVE

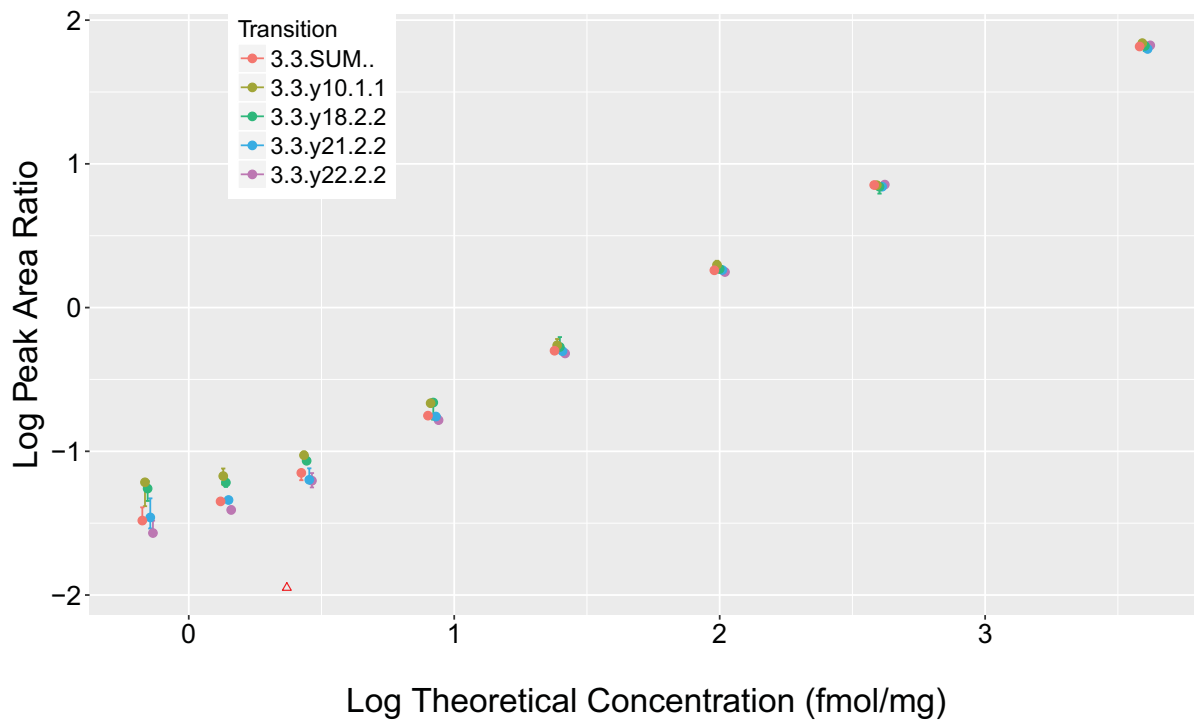

Analyte: sp|Q9BX63|FANCJ\_HUMAN.YSTPPYLLEAASHLSPENFVE

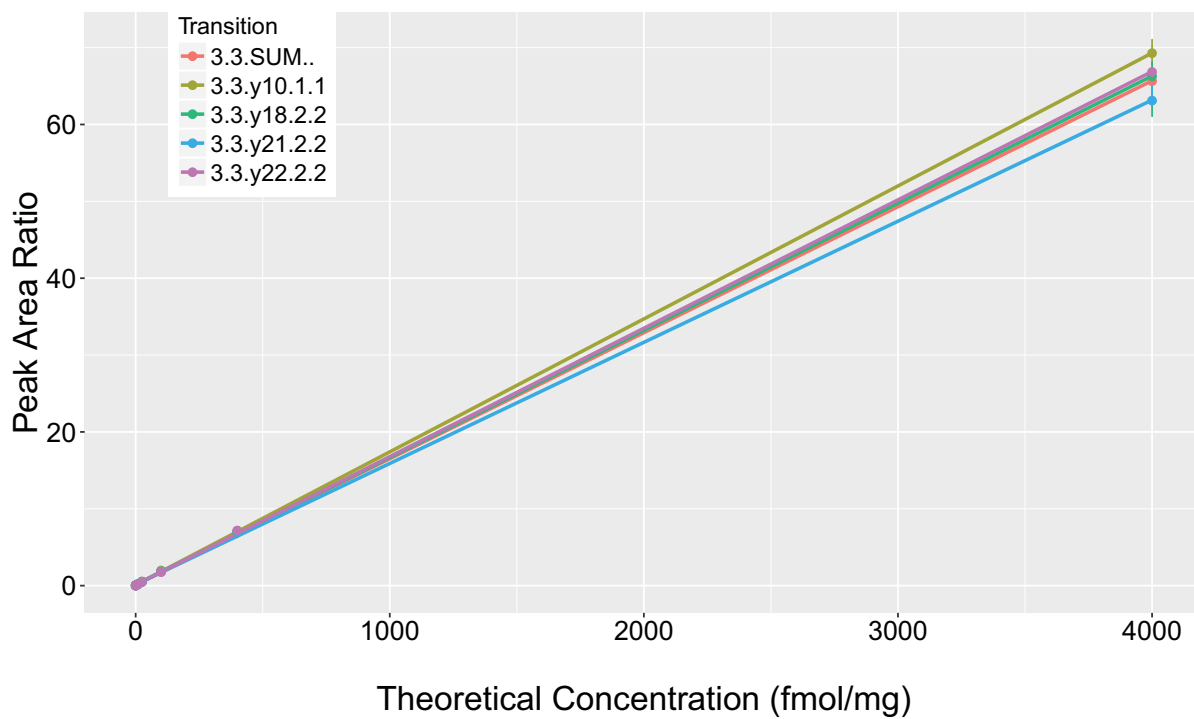

**Supplemental Figure 2. Images of Westerns from screening monoclonal antibodies. (A)** Images from screening against recombinant proteins. Target protein and antibody identifier are listed on top of each figure. (B) Images from screening against HeLa harvested 1 hour following 10 Gy irradiation.

**(A)**

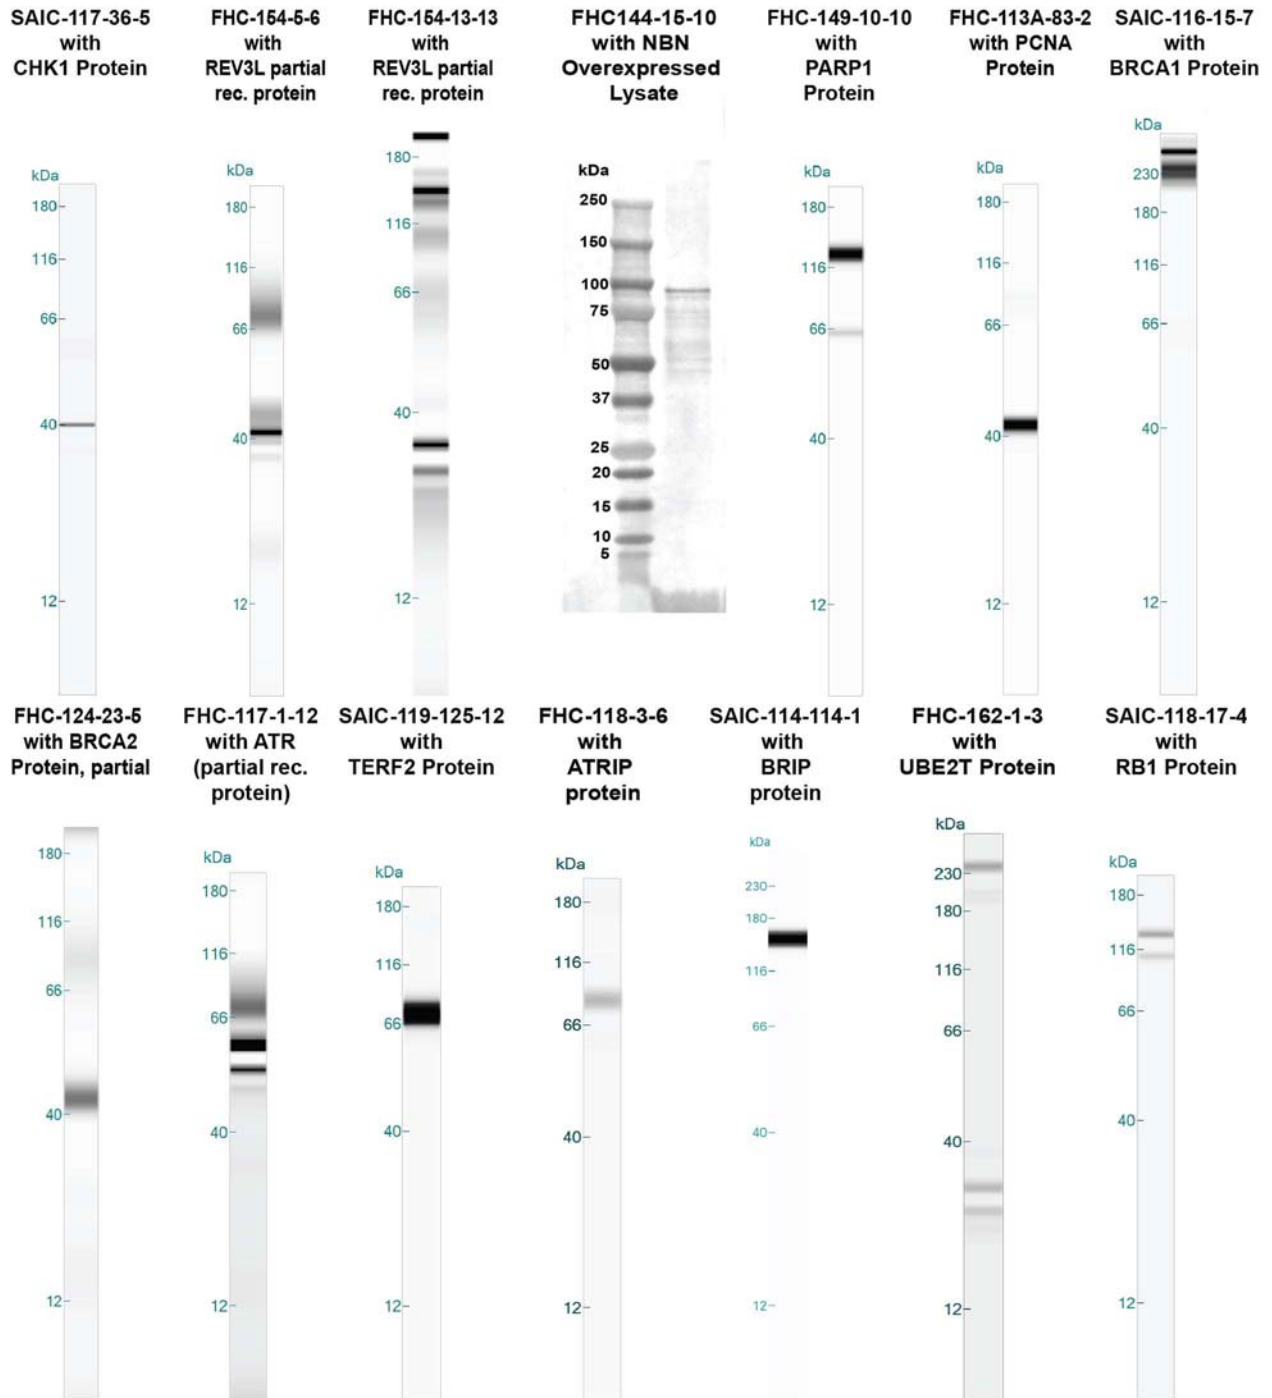

**FHC-151-108-8  
with  
RAD18 Protein**

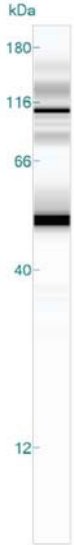

**FHC-151-110-7  
with  
RAD18 Protein**

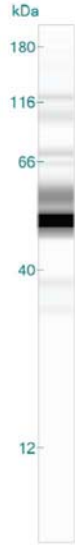

**FHC-142-26-5  
with JUN Lysate**

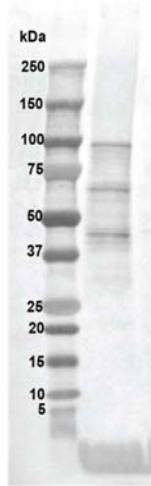

**FHC-113B-31-8  
with PCNA  
Protein**

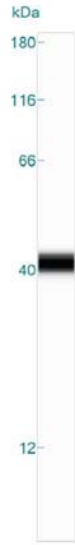

**FHC-130-8-4  
with  
FAAP100  
Protein**

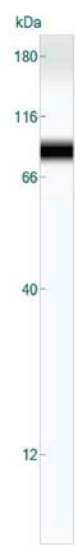

**FHC-130-22-10  
with  
FAAP100  
Protein**

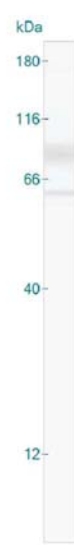

**SAIC-106-12-12  
with  
PCNA Protein**

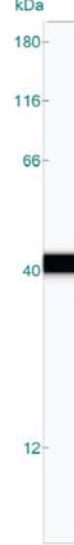

**(B)**

**SAIC-117-36-5  
CHK1**

Std HeLa  
Ladder Lysate

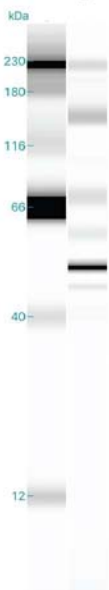

**FHC-149-10-10  
PARP1**

Std HeLa  
Ladder Lysate

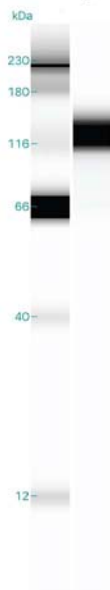

**FHC-113A-83-2  
PCNA**

Std HeLa  
Ladder Lysate

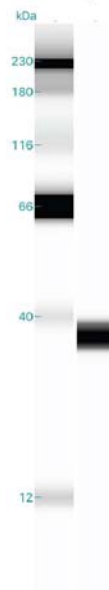

**SAIC-116-15-7  
BRCA1**

Std HeLa  
Ladder Lysate

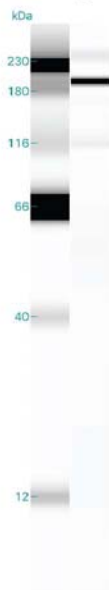

**FHC-130-8-4  
FAAP100**

Std HeLa  
Ladder Lysate

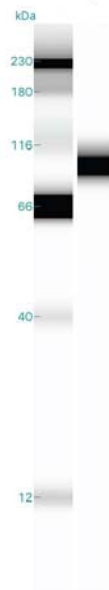



**SAIC-119-125-12  
TERF2**

Std HeLa  
Ladder Lysate

kDa  
230  
180  
116  
66  
40  
12

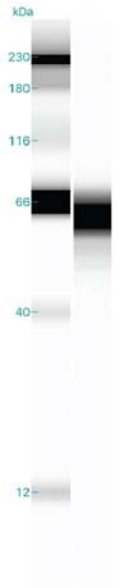

**SAIC-114-114-1  
BRIP1**

Std HeLa  
Ladder Lysate

kDa  
230  
180  
116  
66  
40  
12

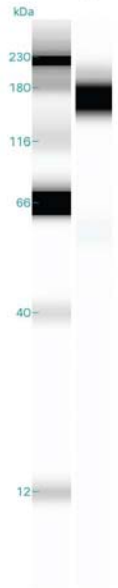

**FHC-142-25-5  
JUN**

Std HeLa  
Ladder Lysate

kDa  
230  
180  
116  
66  
40  
12

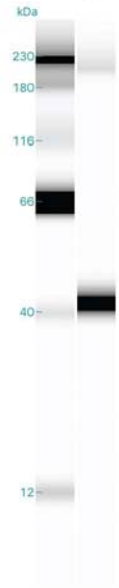

**FHC-113B-31-8  
PCNA**

Std HeLa  
Ladder Lysate

kDa  
230  
180  
116  
66  
40  
12

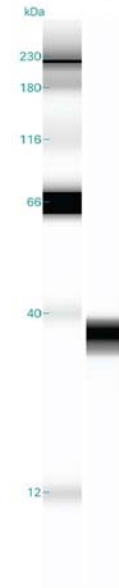

Supplement: NIHMS1500044-supplement-Supplementary_file_2.pdf [file NIHMS1500044-supplement-Supplementary_file_2.pdf]
